# Supplementary material for: Models of similarity in complex networks
Source: PeerJ Comput Sci. 2023 May 2;9:e1371. doi: 10.7717/peerj-cs.1371 (PMC10280390; doi:10.7717/peerj-cs.1371)
Supplement: Supplemental Information 1 [file peerj-cs-09-1371-s001.xlsx]

## Sheet: Sheet1
	date 1	date 2	Jaccard Index	Weighted Jaccard Index	Graph Edit Distance	Graph Edit Distance (norm)	veo	vertex_ranking	Vector Similarity Algorithm	Signature similarity	Frobenius	Frobenius_norm	Frobenius (Weighted)	IpsenMikhailov	HammingIpsenMikhailov	PolynomialDissimilarity	degreeJSD	PortraitDivergence	CommunicabilityJSD	GraphDiffusion	ResistancePerturbation	NetLSD	NetSimile	λ-d Adj.	λ-d Lap.	λ-d N.L.	Lap.JS	NBD	d-NBD	Onion Spectrum (Extended)	dk-series	nodes_neighborhood 1	nodes_neighborhood 2	nodes_neighborhood 3	MCS	deltacon	d-measure	LD-measure	lric_sim	QuantumJSD
0	2019-01	2019-02	0.764228	0.873903	667	0.224882	0.873314	0.71937	0.545888	0.999817	57.0877	0.416698	16419.5	0.117048	0.125265	0.00361059	0.757678	0.116968	0.00175313	4.56755		32.5133	1.93279	9142.08	6468.71	1.27953	0.119736	0.241472	1.89621	0.995121	0.703094	0.452351	0.538395	0.564484	0.328467	0.186467			0.0500903	0.308571
1	2019-01	2019-03	0.703362	0.848325	900	0.283822	0.83462	0.768694	0.465542	0.999939	54.2955	0.396317		0.125957	0.114637	0.00341732	0.746094	0.161916	0.00270892	3.97314		44.4599	2.35381	4802.92	10447	1.46892	0.136794	0.383708	2.32159	0.998609	0.698709	0.423938	0.489363	0.514072	0.357664	0.191955			0.070244	0.263068
2	2019-01	2019-04	0.637394	0.792933	1152	0.347616	0.789627	0.746553	0.36605	0.999817	56.6216	0.413296		0.0953407	0.123116	0.00351	0.774988	0.166174	0.000707413	4.17101		11.0782	2.62071	4370.71	12176.4	0.404686	0.122473	0.366638	1.61564	1	0.736795	0.368721	0.453857	0.45677	0.386861	0.192258			0.0919309	0.278685
3	2019-01	2019-05	0.611077	0.734027	1257	0.373108	0.770662	0.729586	0.36082	0.999817	56.2228	0.410385		0.133438	0.123623	0.00351312	0.763168	0.122915	0.00106196	3.97871		2.40586	2.44514	39817.1	17123	0.614355	0.175663	0.473053	2.50459	1	0.660709	0.353428	0.441423	0.44145	0.394161	0.193207			0.0999952	0.28585
4	2019-01	2019-06	0.598564	0.726463	1342	0.385632	0.761125	0.749904	0.335232	0.999817	56.6745	0.413683	26407.8	0.127929	0.126324	0.003606	0.771937	0.164136	0.00164305	4.11492		0.212384	3.8054	30663.9	19272.3	0.499618	0.147848	0.63603	1.81794	0.999324	0.665917	0.347283	0.434315	0.435846	0.40146	0.193305			0.104337	0.279543
5	2019-01	2019-07	0.606628	0.675167	1282	0.377503	0.767332	0.740251	0.332721	0.999756	57.2014	0.417528		0.1306	0.128696	0.00360357	0.758029	0.178161	0.00169756	4.46897		21.6802	3.25239	66580.1	24382.1	1.32233	0.115234	0.556153	3.34316	1	0.725171	0.351488	0.442725	0.453482	0.394161	0.191885			0.11804	0.298018
6	2019-01	2019-08	0.605158	0.637948	1286	0.378904	0.766267	0.779692	0.335965	0.999756	56.6392	0.413425		0.134909	0.125925	0.0035699	0.772974	0.154011	0.00123089	4.12903		21.5073	2.91842	127229	24403.6	1.32757	0.0916482	0.564268	2.72121	1	0.783379	0.348206	0.434311	0.435543	0.394161	0.190676			0.102159	0.290132
7	2019-01	2019-09	0.58053	0.657794	1409	0.403032	0.747627	0.753794	0.319578	0.999817	54.7266	0.399464		0.138226	0.119608	0.00341573	0.751773	0.152543	0.00202836	4.17765		32.946	3.45012	92528.8	21922.1	1.29931	0.118832	0.658086	2.41183	1	0.664783	0.33298	0.416022	0.425738	0.408759	0.192746			0.121361	0.28228
8	2019-01	2019-10	0.597033	0.604327	1358	0.387226	0.759901	0.660568	0.336846	0.999756	59.1101	0.43146		0.173624	0.139401	0.00380977	0.759303	0.136706	0.007384	4.7395		87.9248	5.67078	157519	31351.5	2.03609	0.132989	0.653045	2.69861	1	0.77625	0.361645	0.435141	0.439514	0.379562	0.185537			0.126734	0.30993
9	2019-01	2019-11	0.601371	0.640074	1337	0.382985	0.763153	0.731434	0.353403	0.999878	57	0.416058		0.167474	0.13052	0.00360205	0.785541	0.15108	0.00537921	4.46978		55.453	4.93232	146783	18324.4	1.8674	0.127617	0.627911	2.24793	1	0.682183	0.362501	0.444407	0.448636	0.386861	0.185654			0.108727	0.304081
10	2019-01	2019-12	0.586944	0.62289	1411	0.397129	0.752239	0.710694	0.339947	0.999756	58.1292	0.4243	45630	0.145031	0.13237	0.00370768	0.778371	0.143253	0.0107493	4.35139		110.453	6.05261	175085	18401.1	2.42466	0.124905	0.634358	1.21876	1	0.757859	0.344768	0.412316	0.415118	0.379562	0.185764			0.121251	0.290135
11	2019-01	2020-01	0.587872	0.629255	1400	0.396152	0.752999	0.77671	0.345364	0.999756	56.745	0.414197		0.142727	0.12626	0.00352137	0.763872	0.124096	0.00917317	3.73021		77.5726	4.7152	173134	18091.9	2.18759	0.119708	0.526759	1.55852	1	0.723341	0.351171	0.438749	0.438978	0.386861	0.186056			0.112992	0.283071
12	2019-01	2020-02	0.58088	0.622945	1438	0.403027	0.747631	0.683728	0.338163	0.999817	57.7754	0.421718		0.182207	0.131525	0.00372278	0.770161	0.200041	0.0132012	4.33836		122.126	6.47662	180133	18280	2.7276	0.106161	0.523634	1.24287	1	0.759968	0.356482	0.438817	0.445155	0.364964	0.185827			0.113148	0.309382
13	2019-01	2020-03	0.567098	0.625668	1471	0.416124	0.737275	0.678139	0.323788	0.999817	56.8419	0.414904	40892.8	0.135197	0.126859	0.00353401	0.756061	0.228171	0.00903115	4.33454		77.4063	4.6922	137016	11938.8	2.06318	0.108665	0.518581	1.8544	0.999322	0.732774	0.34885	0.430531	0.43703	0.40146	0.182137			0.113093	0.274489
14	2019-01	2020-04	0.499674	0.299011	1533	0.478913	0.685151	0.768349	0.208811	0.999329	53.6749	0.391788		0.151651	0.116354	0.00328993	0.760089	0.355469	0.00424156	4.8248		22.7994	2.63916	112290	57816.8	0.757031	0.125203	0.76064	3.54853	0.998443	0.777666	0.273324	0.403766	0.412829	0.423358	0.16933			0.112988	0.277822
15	2019-01	2020-05	0.525898	0.324451	1492	0.454324	0.706068	0.763079	0.2269	0.999329	54.8999	0.400729	12185.9	0.128081	0.117408	0.0034989	0.784855	0.34903	0.00214384	4.63516		44.9198	1.97181	105873	55252.6	0.423074	0.130293	0.424316	2.39826	1	0.644323	0.288377	0.403568	0.399936	0.437956	0.174809			0.105564	0.282046
16	2019-01	2020-06	0.538368	0.4434	1516	0.443145	0.715359	0.744423	0.245538	0.999573	55.3534	0.404039	43099.6	0.139272	0.119652	0.00346371	0.751825	0.356969	0.00167509	4.43962		44.2754	2.67769	60556.7	50781.2	1.52418	0.124028	0.336927	2.89502	1	0.720421	0.304528	0.420898	0.438679	0.408759	0.170615			0.119622	0.276928
17	2019-01	2020-07	0.553327	0.594649	1470	0.428821	0.72707	0.767511	0.257301	0.999634	55.3534	0.404039		0.13871	0.119016	0.00348049	0.785009	0.220934	0.00308182	4.48106		44.2782	3.17388	28156.6	31949.3	1.58292	0.136994	0.408823	2.47017	1	0.666383	0.312875	0.390052	0.400374	0.423358	0.164654			0.121006	0.29888
18	2019-01	2020-08	0.534297	0.598062	1514	0.446871	0.712277	0.706179	0.251563	0.999695	53.963	0.39389		0.134327	0.115749	0.00331125	0.75978	0.204845	0.0024026	4.04814		3.50664	2.43707	40361.7	21338.5	0.888018	0.131633	0.404557	3.61809	0.999271	0.685414	0.295101	0.378708	0.390458	0.437956	0.163039			0.116643	0.276276
19	2019-01	2020-09	0.528347	0.620262	1564	0.452939	0.707226	0.67235	0.253775	0.999634	56.9737	0.415866		0.158884	0.127628	0.00357314	0.759313	0.146381	0.00443714	4.49539		65.3814	3.6798	31153.7	26839.4	2.1615	0.154105	0.375261	2.75987	1	0.595703	0.303203	0.372334	0.373627	0.430657	0.166689			0.129014	0.320477
20	2019-01	2020-10	0.519798	0.609621	1613	0.461384	0.70013	0.686967	0.257316	0.999573	56.2761	0.410774	34973	0.153786	0.124109	0.00354398	0.786301	0.216485	0.00494358	4.19102		87.9088	3.95965	47742.4	29695	2.06439	0.161847	0.319698	2.91909	0.999291	0.669527	0.290889	0.349443	0.344364	0.430657	0.167658			0.150967	0.289785
21	2019-01	2020-11	0.529609	0.553312	1541	0.451509	0.70842	0.739284	0.266108	0.99939	54.7266	0.399464	38129.9	0.120108	0.115133	0.00347291	0.764707	0.310454	0.000733768	4.13181		12.0176	2.3018	47013.7	41663.4	0.231382	0.0949734	0.32793	1.70844	0.999279	0.732814	0.293194	0.372831	0.374038	0.430657	0.171259			0.132731	0.292407
22	2019-01	2020-12	0.540804	0.561338	1508	0.440807	0.717285	0.740132	0.272577	0.99939	56.5332	0.412651		0.0958083	0.122473	0.00349473	0.728331	0.247667	0.000552608	4.38863		22.2384	2.42504	60947.6	38274.9	0.318835	0.136743	0.361636	1.26869	0.999288	0.756441	0.312652	0.38799	0.394221	0.423358	0.175341			0.132692	0.282313
23	2019-01	2021-01	0.548966	0.560519	1483	0.432993	0.723682	0.726595	0.273702	0.999573	54.8361	0.400264	12767.6	0.102723	0.115242	0.00358884	0.732326	0.217877	0.000607786	4.39688		22.4165	1.67175	43994.4	41046	0.50113	0.131101	0.303568	1.70271	0.999287	0.608518	0.303236	0.386116	0.386666	0.437956	0.176136			0.122714	0.253062
24	2019-01	2021-02	0.534801	0.547641	1564	0.446985	0.712183	0.69677	0.258784	0.999451	56.107	0.40954	19695.4	0.131049	0.123634	0.00350437	0.769473	0.263916	0.00522078	4.55994		32.7085	2.81708	31331.8	46272.1	1.54424	0.114462	0.298487	2.51083	1	0.721888	0.303395	0.390497	0.40134	0.423358	0.173252			0.137194	0.30504
25	2019-01	2021-03	0.530409	0.512774	1606	0.451504	0.708424	0.730111	0.25784	0.99939	54.3139	0.396452	42958.3	0.15732	0.117426	0.00336618	0.775448	0.248175	0.0124796	3.75799		110.262	4.33475	115618	41912.3	2.07991	0.134983	0.366173	1.61929	1	0.687988	0.312255	0.405175	0.423562	0.40146	0.166649			0.131234	0.261488
26	2019-01	2021-04	0.541149	0.515998	1589	0.441389	0.716806	0.697617	0.262282	0.99939	57.3498	0.418612		0.171867	0.131302	0.00360735	0.751178	0.242656	0.0151736	4.20467		110.484	5.59994	139963	38097.7	2.67967	0.140095	0.424775	2.27969	0.999327	0.723389	0.31327	0.411507	0.431918	0.40146	0.164242			0.137819	0.292077
27	2019-01	2021-05	0.535411	0.518156	1640	0.447232	0.711978	0.680344	0.260613	0.99939	54.827	0.400197		0.196119	0.122597	0.00339306	0.731035	0.326206	0.0162643	3.95814		165.601	8.20492	164737	34145.2	3.07563	0.159847	0.615448	2.07494	0.998669	0.731819	0.319691	0.406194	0.421091	0.40146	0.167095			0.128029	0.249762
28	2019-01	2021-06	0.548123	0.523532	1601	0.435054	0.722	0.676317	0.27594	0.999451	54.909	0.400796	16089	0.184703	0.121561	0.00352569	0.760333	0.309701	0.0130434	4.19963		131.92	7.41306	201400	22777.7	2.39666	0.17745	0.812085	2.45058	0.999341	0.716927	0.323442	0.4117	0.430487	0.379562	0.165088			0.131629	0.306717
29	2019-01	2021-07	0.545151	0.50213	1632	0.438121	0.719491	0.70308	0.271385	0.999573	59.0762	0.431213		0.180317	0.141353	0.00376198	0.767142	0.290261	0.0137655	4.42068		122.204	7.75987	234976	6587.45	2.91541	0.138385	0.948085	2.91555	0.999352	0.678508	0.322986	0.418409	0.441912	0.372263	0.296156			0.132541	0.316266
30	2019-01	2021-08	0.547531	0.508248	1585	0.43544	0.721686	0.645057	0.275026	0.999573	56.9122	0.415418		0.15952	0.129857	0.00361631	0.749241	0.245272	0.00872167	4.54736		99.9373	6.54749	222054	5415.43	2.49743	0.133012	0.720435	2.09934	1	0.631089	0.317571	0.386839	0.389864	0.408759	0.166541			0.13275	0.315193
31	2019-01	2021-09	0.553167	0.552213	1538	0.429729	0.726335	0.715809	0.279378	0.999634	55.9643	0.408498		0.155469	0.124437	0.0035505	0.757191	0.241156	0.00469336	4.17148		56.1014	4.27249	171421	6109.98	1.62976	0.104323	0.632532	2.26491	0.997954	0.658203	0.305193	0.390311	0.401261	0.416058	0.170519			0.124024	0.279934
32	2019-01	2021-10	0.535314	0.537994	1658	0.447503	0.711752	0.677154	0.276498	0.999634	57.81	0.421971	36027.9	0.154158	0.131972	0.00375126	0.746082	0.280842	0.0039604	4.51881		33.7135	4.13305	213234	6491.61	1.68382	0.113534	0.78652	1.62779	1	0.682124	0.297241	0.394827	0.418414	0.40146	0.323695			0.128879	0.308417
33	2019-01	2021-11	0.559605	0.563614	1559	0.423987	0.730975	0.751591	0.292485	0.999756	55.3263	0.403842	24810.8	0.136981	0.122093	0.00352215	0.713787	0.271923	0.00757596	4.22789		78.4744	6.02233	202529	6789.08	2.18113	0.148961	0.765134	1.46569	1	0.644099	0.319207	0.399481	0.411158	0.416058	0.178355			0.111822	0.273623
34	2019-01	2021-12	0.571429	0.562017	1497	0.412397	0.740239	0.732786	0.302505	0.999634	56.2583	0.410645	32440.6	0.107985	0.125824	0.00349973	0.734555	0.300974	0.00387679	4.08307		11.9305	5.05435	215209	7493.61	0.695363	0.0976125	0.821028	1.57254	1	0.704397	0.320566	0.412034	0.416697	0.408759	0.180454			0.107795	0.260308
35	2019-02	2019-03	0.728499	0.877073	805	0.25951	0.850898	0.722583	0.512928	0.999878	57.4543	0.419375	28309.7	0.0985923	0.126266	0.00366185	0.751707	0.139841	0.00170837	4.69506		12.0503	1.77328	10193.6	7957.94	0.352188	0.0889207	0.4407	1.29143	0.9993	0.699598	0.431376	0.527196	0.550907	0.328467	0.185774			0.06715	0.318325
36	2019-02	2019-04	0.654586	0.809329	1077	0.330876	0.801767	0.738755	0.389157	0.999878	55.9553	0.408433	18894	0.142219	0.121417	0.00342952	0.784327	0.166905	0.0021806	4.37542		43.5798	3.74007	8758.49	10485.9	1.05678	0.134516	0.420562	1.76901	0.974766	0.684626	0.386692	0.488584	0.488963	0.372263	0.188347			0.0903239	0.284389
37	2019-02	2019-05	0.629536	0.746931	1174	0.355112	0.784112	0.750439	0.38041	0.999878	55.8928	0.407976	31239.5	0.144713	0.121469	0.00350344	0.752321	0.128244	0.00136325	4.24333		33.9119	3.01764	48186.2	15889.1	0.885298	0.126814	0.522027	1.47607	0.998602	0.721789	0.371232	0.479635	0.479267	0.364964	0.188606			0.09296	0.294056
38	2019-02	2019-06	0.609778	0.735745	1285	0.374636	0.769507	0.7445	0.3587	0.999878	56.8595	0.415033		0.161359	0.128055	0.00359058	0.782406	0.158912	0.00310578	4.57255		32.3976	4.3401	39143.6	18569.7	1.00609	0.119207	0.679844	1.4176	0.99932	0.702401	0.350495	0.45885	0.460668	0.372263	0.188921			0.0990116	0.309634
39	2019-02	2019-07	0.609235	0.688832	1261	0.374851	0.769343	0.775253	0.353859	0.999817	55.9017	0.408042	29485.7	0.128235	0.121683	0.0035116	0.781168	0.177495	0.000938714	4.3363		10.8343	3.28593	74993.8	23915.3	0.13173	0.133747	0.591063	1.8896	1	0.825278	0.347301	0.457502	0.463331	0.372263	0.188038			0.115674	0.297293
40	2019-02	2019-08	0.615265	0.644233	1235	0.368987	0.773768	0.760352	0.359436	0.999695	55.7046	0.406603		0.131102	0.121279	0.00343803	0.771736	0.136337	0.000844141	4.12425		11.0095	3.19771	135699	24250.7	0.127025	0.122027	0.590898	1.57357	1	0.715507	0.350608	0.446965	0.44489	0.372263	0.186058			0.0994118	0.308389
41	2019-02	2019-09	0.588058	0.675342	1366	0.395598	0.75343	0.740778	0.342504	0.999756	57.8619	0.42235		0.143717	0.132218	0.0036722	0.742845	0.144096	0.00116901	4.39252		1.16689	3.34188	100909	21570.8	0.183551	0.123407	0.699961	1.67735	0.99863	0.618596	0.335279	0.425585	0.435332	0.379562	0.185982			0.118725	0.321783
42	2019-02	2019-10	0.598025	0.61157	1343	0.386141	0.760734	0.690124	0.349588	0.999573	56.6833	0.413747	45959.5	0.158083	0.128682	0.00356692	0.788223	0.134564	0.00568743	4.50781		55.4288	4.86688	165929	30919.5	0.998613	0.0999001	0.698727	1.79332	0.998649	0.773822	0.357579	0.431019	0.434623	0.364964	0.183093			0.126717	0.329234
43	2019-02	2019-11	0.591873	0.646261	1366	0.392078	0.756159	0.727393	0.36625	0.999695	57.4456	0.419311	36620.2	0.173461	0.132328	0.00359713	0.821372	0.160448	0.00364868	4.18784		22.9974	4.32691	155231	18785.3	0.801984	0.109914	0.677743	1.64225	1	0.698551	0.3558	0.42398	0.423924	0.379562	0.181392			0.11816	0.312201
44	2019-02	2019-12	0.581765	0.631047	1422	0.402036	0.748408	0.719043	0.352463	0.999573	57.6541	0.420833		0.136561	0.13099	0.00368882	0.790728	0.117743	0.00917205	4.221		77.9661	5.25914	183597	18971.5	1.46588	0.114656	0.693804	1.60183	0.996489	0.726511	0.345037	0.424647	0.43184	0.379562	0.181054			0.120968	0.312506
45	2019-02	2020-01	0.580798	0.634329	1419	0.402896	0.747733	0.696852	0.350782	0.999573	58.4551	0.42668	44640.4	0.142861	0.134391	0.00371162	0.774397	0.128421	0.00798767	4.57526		45.1015	4.13298	181657	18708.7	1.22499	0.128258	0.564043	1.55732	0.998649	0.749731	0.34215	0.433122	0.442665	0.372263	0.180786			0.116429	0.337457
46	2019-02	2020-02	0.58966	0.629397	1389	0.394378	0.754377	0.689916	0.352736	0.999634	57.836	0.42216		0.174344	0.131938	0.00372779	0.803357	0.172973	0.0109973	4.22446		89.6503	5.60406	188636	19487.7	1.8347	0.113448	0.570185	1.79277	0.951634	0.692171	0.365311	0.45276	0.458346	0.350365	0.182046			0.111234	0.30389
47	2019-02	2020-03	0.569222	0.633669	1450	0.413931	0.739021	0.697157	0.327989	0.999634	57.0088	0.416122	43002.6	0.151635	0.127686	0.00354683	0.767189	0.221906	0.00776986	4.1657		44.9288	3.88833	145511	13095.2	1.07233	0.0963856	0.570827	1.6722	0.960771	0.755245	0.350548	0.431984	0.436113	0.394161	0.179162			0.115656	0.293997
48	2019-02	2020-04	0.510285	0.310776	1476	0.468423	0.694157	0.697106	0.215759	0.999268	55.2449	0.403248		0.153012	0.120426	0.0034235	0.760153	0.330118	0.00328688	4.75688		55.2665	2.95128	104021	58889.4	1.77856	0.11332	0.742689	2.10334	0.999217	0.781366	0.284269	0.404501	0.411727	0.408759	0.166871			0.120713	0.310256
49	2019-02	2020-05	0.530717	0.337864	1459	0.449476	0.710113	0.743842	0.234107	0.999146	53.8609	0.393145	18339	0.13717	0.11206	0.00341528	0.769711	0.315246	0.00310763	4.53738		77.3995	2.86976	97645.1	56356.3	1.36468	0.0918457	0.449521	1.62415	0.999249	0.659098	0.292866	0.407812	0.407879	0.430657	0.172468			0.112341	0.287484
50	2019-02	2020-06	0.536975	0.463405	1509	0.444346	0.714367	0.74468	0.250719	0.99939	55.9375	0.408303		0.111986	0.119796	0.00344954	0.756019	0.321446	0.000400275	4.26072		11.833	1.90236	52983.2	51917.3	0.391328	0.111115	0.354799	1.45232	0.998569	0.651653	0.300996	0.420774	0.434993	0.394161	0.167538			0.127348	0.307691
51	2019-02	2020-07	0.552051	0.600074	1463	0.429915	0.726184	0.749183	0.257565	0.999451	57.0877	0.416698		0.128547	0.124855	0.00356724	0.784985	0.207967	0.0011427	4.42115		11.8299	2.47726	33695.1	33389.7	0.425477	0.118941	0.455554	1.20877	1	0.673964	0.309109	0.388067	0.405149	0.40146	0.161928			0.129071	0.322954
52	2019-02	2020-08	0.532858	0.60272	1507	0.448112	0.711247	0.700116	0.252282	0.999512	56.1516	0.409866	21280.3	0.138497	0.121672	0.00349233	0.769912	0.189365	0.00202412	4.46764		34.447	2.71259	47719.1	22861.9	0.787858	0.140455	0.422289	2.15198	0.998533	0.729146	0.289307	0.368234	0.384735	0.423358	0.160176			0.129452	0.321843
53	2019-02	2020-09	0.520424	0.62148	1585	0.460488	0.700887	0.683	0.248476	0.999451	56.6304	0.41336	43025.5	0.133797	0.124549	0.0035237	0.758257	0.121994	0.00190816	4.39619		32.8737	2.74009	37594.4	28244.7	1.11924	0.132774	0.379123	1.58715	1	0.68911	0.291954	0.36392	0.373634	0.416058	0.163452			0.140382	0.325901
54	2019-02	2020-10	0.509693	0.608014	1644	0.47106	0.691904	0.702989	0.248163	0.99939	56.107	0.40954	30343.5	0.136963	0.122993	0.0034997	0.763433	0.212808	0.00237182	4.45983		55.4138	3.20384	55341.4	31142.5	1.01372	0.128086	0.341286	2.01384	1	0.668276	0.280131	0.346891	0.34973	0.408759	0.165135			0.160895	0.307619
55	2019-02	2020-11	0.527206	0.554187	1538	0.453687	0.706601	0.722058	0.259056	0.999207	54.1295	0.395106		0.138752	0.113385	0.00325776	0.763988	0.283037	0.00138031	4.26706		44.4299	3.23992	54483.3	42941.6	1.21503	0.11768	0.346348	1.97309	0.999275	0.619261	0.285767	0.360765	0.368933	0.416058	0.168251			0.152295	0.288831
56	2019-02	2020-12	0.53004	0.551751	1541	0.451112	0.708751	0.749774	0.259081	0.999207	54.2679	0.396116		0.137544	0.115492	0.00333599	0.739261	0.226885	0.00185308	4.21349		54.7346	3.46697	69009.8	39385.4	1.39844	0.115411	0.381625	2.35984	0.946271	0.744529	0.289277	0.369701	0.384589	0.416058	0.173113			0.147438	0.29526
57	2019-02	2021-01	0.541985	0.548056	1500	0.439625	0.718257	0.760249	0.261381	0.99939	56.0179	0.408889		0.118489	0.120988	0.00365848	0.775833	0.194444	0.0018903	4.37647		54.9045	2.19656	51456.1	42048.1	1.03269	0.119057	0.332739	1.42555	0.988702	0.797052	0.302197	0.381306	0.388389	0.423358	0.172943			0.127744	0.309432
58	2019-02	2021-02	0.532036	0.541933	1563	0.449525	0.710072	0.729617	0.253215	0.999268	56.0625	0.409215		0.117671	0.122443	0.00343426	0.765253	0.225742	0.00321355	4.38978		0.520238	2.17121	37705.7	47205.1	0.466512	0.103699	0.325086	1.25586	1	0.718582	0.307225	0.399523	0.408526	0.40146	0.170371			0.13858	0.309539
59	2019-02	2021-03	0.528563	0.506467	1601	0.453156	0.707045	0.608712	0.257579	0.999207	58.7282	0.428673	42332.9	0.150069	0.135397	0.00372005	0.814222	0.239505	0.00983889	4.94528		77.7708	3.86965	123920	42952	1.12983	0.135617	0.412794	1.75598	1	0.672655	0.308625	0.409642	0.426473	0.386861	0.162698			0.143588	0.311925
60	2019-02	2021-04	0.531829	0.508422	1618	0.45032	0.709411	0.727019	0.255997	0.999207	55.8928	0.407976		0.149571	0.124604	0.00344883	0.790773	0.21755	0.0129249	4.41683		77.9978	5.06366	148370	39112.5	1.85132	0.138764	0.468084	1.40061	0.939622	0.685851	0.312582	0.406646	0.422898	0.379562	0.162277			0.148313	0.295248
61	2019-02	2021-05	0.531036	0.510019	1647	0.451357	0.708547	0.6734	0.254255	0.999207	56.8243	0.414776		0.155219	0.129122	0.00359289	0.754794	0.317383	0.0132716	4.275		133.11	7.58055	173147	35321.5	2.31768	0.151835	0.668634	1.29934	1	0.664571	0.310197	0.401043	0.412755	0.379562	0.163571			0.139968	0.307967
62	2019-02	2021-06	0.53512	0.513873	1648	0.447583	0.711686	0.66863	0.266162	0.999268	56.6392	0.413425		0.170996	0.128448	0.00359574	0.765347	0.283361	0.0111266	4.52762		99.4206	6.68278	209831	24854.1	1.47158	0.164993	0.860002	1.47197	0.999337	0.6964	0.309516	0.409402	0.426961	0.372263	0.162758			0.14311	0.296687
63	2019-02	2021-07	0.530607	0.493614	1687	0.452158	0.707879	0.711452	0.260604	0.99939	57	0.416058		0.157451	0.131439	0.00357937	0.775561	0.269949	0.0115083	4.33551		89.7277	7.02347	243446	9996.25	2.09946	0.12402	0.996242	1.66521	0.999348	0.776082	0.304107	0.408186	0.42756	0.357664	0.164088			0.145425	0.323751
64	2019-02	2021-08	0.544071	0.505468	1588	0.438674	0.719038	0.677311	0.272802	0.99939	57.4282	0.419184		0.124599	0.130381	0.0035844	0.807867	0.222251	0.00638604	4.65209		67.4644	5.77256	230520	9783	1.61093	0.126712	0.770489	1.24606	0.99933	0.690315	0.30768	0.381528	0.390207	0.386861	0.165409			0.144914	0.331561
65	2019-02	2021-09	0.561543	0.554697	1489	0.421455	0.733011	0.773284	0.290138	0.999451	56.2761	0.410774		0.159124	0.125078	0.00360346	0.749139	0.224848	0.00277877	4.24382		23.7069	3.58682	179841	10660.5	0.470697	0.127665	0.680694	1.23942	0.999314	0.804833	0.305723	0.394922	0.411491	0.394161	0.169466			0.126284	0.305739
66	2019-02	2021-10	0.544912	0.535241	1601	0.43803	0.719566	0.704363	0.288577	0.999451	55.254	0.403314	33931.1	0.151702	0.121149	0.00348652	0.771679	0.262728	0.00302105	4.10451		2.11194	4.03754	221699	10697.5	0.526972	0.123694	0.839678	1.5972	0.99732	0.766856	0.29909	0.394976	0.414825	0.379562	0.174727			0.129468	0.304201
67	2019-02	2021-11	0.551402	0.558661	1584	0.431843	0.724618	0.717937	0.291805	0.999573	56.4447	0.412005	38831.8	0.146499	0.128315	0.00356135	0.764814	0.265755	0.00690986	4.36383		46.0427	5.25831	211002	11502.7	1.24625	0.149843	0.820526	2.42043	1	0.638646	0.319218	0.407819	0.420033	0.394161	0.175201			0.115297	0.286814
68	2019-02	2021-12	0.571264	0.560295	1486	0.412434	0.74021	0.800346	0.30444	0.999451	54.626	0.39873	25718.6	0.148275	0.121933	0.00338315	0.787437	0.281354	0.00508071	3.846		20.7309	5.28302	223725	11803.2	0.842784	0.112412	0.865459	2.55873	1	0.675331	0.317583	0.407426	0.41776	0.394161	0.179458			0.113775	0.280904
69	2019-03	2019-04	0.732468	0.869258	824	0.256139	0.853119	0.763371	0.467649	0.999878	55.0091	0.401526		0.128629	0.11814	0.00335011	0.773862	0.18216	0.00200306	3.79162		55.5364	2.86451	3129.67	3919.26	1.24366	0.120714	0.288321	2.12882	1	0.693246	0.444509	0.568086	0.573632	0.335766	0.191597			0.0619307	0.262218
70	2019-03	2019-05	0.717363	0.811952	879	0.270711	0.843455	0.723909	0.452194	0.999878	55.4887	0.405027		0.117166	0.120301	0.00343961	0.74038	0.150466	0.00275334	4.15951		45.9215	3.19935	38419.5	8584.59	1.05432	0.12075	0.366141	1.37858	1	0.784683	0.448656	0.561852	0.585018	0.328467	0.191714			0.0652136	0.291187
71	2019-03	2019-06	0.690741	0.779849	1002	0.296713	0.8258	0.745884	0.401898	0.999878	52.8583	0.385827		0.134048	0.112723	0.00327011	0.767865	0.169889	0.00167051	3.79334		44.3415	3.40621	29398.3	11738.8	1.18716	0.125239	0.465822	1.85885	1	0.755547	0.41655	0.543065	0.555172	0.335766	0.195046			0.0724817	0.2355
72	2019-03	2019-07	0.680225	0.727266	1022	0.306631	0.818923	0.759588	0.39218	0.999817	54.9181	0.400862		0.103903	0.118222	0.00346524	0.76737	0.170328	0.000695135	4.19668		22.8088	2.29768	65159.2	16878.9	0.360234	0.142446	0.400104	1.97946	1	0.660807	0.408685	0.538688	0.551069	0.335766	0.190836			0.0856554	0.286128
73	2019-03	2019-08	0.676673	0.675799	1034	0.310045	0.816537	0.775153	0.39002	0.999817	54.7723	0.399797		0.114315	0.118326	0.00334577	0.763407	0.135788	0.00103134	4.01083		23.0079	2.50921	125980	17409.1	0.367739	0.131388	0.409569	1.82514	0.99933	0.738263	0.398344	0.527864	0.535188	0.335766	0.188445			0.0730365	0.282337
74	2019-03	2019-09	0.651897	0.705517	1147	0.334207	0.79937	0.728235	0.366214	0.999878	56.0446	0.409085		0.13546	0.125578	0.00348648	0.761811	0.154835	0.000602118	4.37875		11.5247	2.42508	91162.2	14865.3	0.355289	0.131472	0.464131	2.16911	1	0.671006	0.388209	0.493491	0.512168	0.343066	0.189187			0.0942081	0.291152
75	2019-03	2019-10	0.661446	0.643591	1124	0.325137	0.805872	0.780448	0.372998	0.999695	53.8888	0.393349		0.134683	0.117954	0.0033666	0.761823	0.127854	0.0023347	3.85163		43.4763	3.94657	156171	23965.2	0.81468	0.120494	0.470457	2.33105	0.998697	0.649981	0.401981	0.503305	0.523904	0.328467	0.189148			0.105538	0.273837
76	2019-03	2019-11	0.64574	0.669319	1185	0.340322	0.794947	0.770253	0.375843	0.999817	54.0463	0.394498		0.148669	0.119709	0.00333549	0.766026	0.149341	0.00123713	4.17979		10.9943	3.61882	145529	13291	0.597126	0.0916553	0.477675	2.40088	0.997798	0.637682	0.390408	0.491928	0.503819	0.350365	0.186625			0.0977769	0.295549
77	2019-03	2019-12	0.63623	0.649127	1235	0.34966	0.788128	0.717982	0.35887	0.999695	56.8595	0.415033	21418.5	0.116838	0.127243	0.00360539	0.781094	0.146413	0.00406852	4.28982		65.9956	4.23955	173902	13429.5	1.26801	0.12617	0.408488	2.12794	1	0.755483	0.383711	0.475652	0.480303	0.343066	0.18495			0.108672	0.278965
78	2019-03	2020-01	0.626839	0.648084	1268	0.358699	0.781455	0.784188	0.351771	0.999695	53.6284	0.391448	32770.6	0.121001	0.114081	0.00327496	0.753761	0.164759	0.00312864	4.00129		33.1134	3.03558	171970	13680	1.04471	0.135361	0.404288	2.02411	1	0.70848	0.372743	0.480701	0.489175	0.343066	0.187689			0.100907	0.26788
79	2019-03	2020-02	0.635668	0.649094	1238	0.350212	0.787723	0.710402	0.354095	0.999756	56.6745	0.413683		0.133216	0.126181	0.00363996	0.743382	0.147005	0.00560146	4.27662		77.6661	4.63173	178940	13938.4	1.66835	0.108286	0.384131	2.20895	0.995209	0.681145	0.393942	0.514122	0.518722	0.321168	0.186006			0.0969991	0.294623
80	2019-03	2020-03	0.619881	0.635139	1281	0.365269	0.776557	0.718301	0.349543	0.999756	57.1052	0.416826	23791.4	0.129514	0.12816	0.00359309	0.756496	0.187217	0.00307516	4.20823		32.9485	2.86482	135941	19312.3	0.869103	0.106157	0.355925	2.30046	0.999342	0.750327	0.381577	0.505907	0.516344	0.350365	0.182787			0.0973227	0.280436
81	2019-03	2020-04	0.543911	0.296237	1397	0.436563	0.720768	0.722315	0.216715	0.99939	53.3948	0.389743		0.138194	0.115007	0.00322812	0.737823	0.295722	0.0088823	4.78628		67.2461	4.2767	113779	66198.9	1.96607	0.13836	1.01959	1.75807	0.998493	0.826341	0.311887	0.446437	0.460562	0.386861	0.169375			0.111453	0.276296
82	2019-03	2020-05	0.571975	0.321838	1344	0.410131	0.742035	0.739994	0.240812	0.999268	53.9444	0.393755	33389.9	0.128671	0.114263	0.00343829	0.733011	0.283129	0.00683897	4.51123		89.3759	3.60222	107396	63663	1.56635	0.12093	0.637227	1.49186	1	0.771081	0.325019	0.456316	0.473402	0.394161	0.17531			0.0970467	0.276851
83	2019-03	2020-06	0.579172	0.440777	1382	0.403975	0.746886	0.785701	0.257506	0.999512	54.0925	0.394836		0.0965845	0.112185	0.00332411	0.730847	0.279307	0.000574727	4.15338		0.380546	1.87143	62249.4	59234.4	0.468232	0.103246	0.410003	1.2902	1	0.647557	0.332943	0.458318	0.482918	0.364964	0.171542			0.121196	0.279736
84	2019-03	2020-07	0.589215	0.594106	1356	0.394415	0.754348	0.73146	0.265391	0.999573	58.0689	0.423861		0.106838	0.129601	0.00363981	0.756386	0.171793	0.000557218	4.76246		0.46919	2.44981	28757.4	40567.2	0.485009	0.132587	0.403311	1.64238	1	0.65459	0.344866	0.448019	0.458207	0.372263	0.164022			0.122544	0.316259
85	2019-03	2020-08	0.570684	0.602591	1400	0.412007	0.740549	0.749622	0.264795	0.999634	54.6077	0.398596	28279	0.137453	0.117229	0.00339607	0.740029	0.192504	0.00597526	4.02108		46.4776	3.88664	40153.7	29940.8	0.93987	0.140535	0.405482	2.32532	1	0.840513	0.32718	0.423755	0.449965	0.386861	0.163024			0.119318	0.297592
86	2019-03	2020-09	0.562162	0.616009	1458	0.420536	0.733747	0.733117	0.262636	0.999573	56.7803	0.414455		0.127997	0.126518	0.00352171	0.735487	0.148459	0.00174686	4.3812		20.9797	3.09034	31458.5	35512	0.928203	0.130259	0.445977	2.24166	0.999307	0.720385	0.332566	0.415171	0.432677	0.386861	0.165771			0.122846	0.304766
87	2019-03	2020-10	0.552756	0.599361	1509	0.429792	0.726283	0.799104	0.259635	0.999512	49.7695	0.363281	36897.1	0.126774	0.0996253	0.00301943	0.772953	0.176114	0.00177955	3.66243		43.4598	3.02324	47309.9	38361.2	0.810595	0.116665	0.41971	2.37513	1	0.693241	0.329579	0.403308	0.408672	0.379562	0.169192			0.141536	0.258049
88	2019-03	2020-11	0.567642	0.544997	1419	0.415034	0.738144	0.72081	0.264939	0.999329	54.1202	0.395038	10545.7	0.14853	0.115096	0.00334797	0.789718	0.238853	0.00323588	4.35339		56.4199	3.38917	46754.7	50235.5	1.39714	0.147001	0.46107	2.46878	0.994169	0.768749	0.331621	0.414053	0.421459	0.386861	0.171048			0.135368	0.306295
89	2019-03	2020-12	0.569659	0.548583	1424	0.413233	0.739576	0.746906	0.262442	0.999329	54.4059	0.397123		0.141432	0.116916	0.00333823	0.724686	0.211191	0.00334921	4.32094		66.6967	3.40644	60198.1	46661.1	1.59473	0.130088	0.404056	2.69306	1	0.819247	0.325029	0.417902	0.428549	0.394161	0.17683			0.132294	0.281495
90	2019-03	2021-01	0.58298	0.54391	1377	0.400407	0.749682	0.790867	0.272261	0.999512	52.259	0.381452	29584.2	0.11615	0.105767	0.00337411	0.760178	0.179769	0.00236648	4.04598		66.8728	2.09198	43488.4	49405	1.2217	0.122101	0.396566	1.45314	0.999309	0.654248	0.334157	0.428378	0.431175	0.40146	0.178129			0.122923	0.235082
91	2019-03	2021-02	0.573722	0.538281	1434	0.409597	0.742457	0.762545	0.261685	0.99939	54.9181	0.400862	44957.2	0.111851	0.117552	0.0034497	0.715624	0.216593	0.000985369	4.44246		11.7988	2.10888	31110.6	54565.9	0.348514	0.120941	0.385632	1.41517	0.997061	0.701973	0.340963	0.464071	0.485668	0.364964	0.173964			0.125298	0.29313
92	2019-03	2021-03	0.563647	0.498571	1498	0.419608	0.734491	0.76128	0.258746	0.999329	49.3761	0.36041	35928.9	0.134892	0.0988668	0.00299547	0.752178	0.211381	0.00522205	3.22836		65.8063	3.31287	114563	50328.3	0.945801	0.142503	0.340746	2.31293	0.995484	0.665503	0.341243	0.472115	0.490637	0.364964	0.318157			0.130269	0.223594
93	2019-03	2021-04	0.571675	0.503951	1491	0.412106	0.74047	0.687436	0.264706	0.999329	57.1752	0.417337		0.118254	0.128835	0.00352881	0.736765	0.195699	0.00708227	4.17244		66.0267	4.00667	138933	46519.1	1.69816	0.133579	0.311788	1.88558	0.998694	0.606752	0.345076	0.463359	0.489962	0.343066	0.164803			0.132032	0.29189
94	2019-03	2021-05	0.547938	0.504907	1622	0.435436	0.721688	0.634432	0.260259	0.999329	58.2409	0.425116		0.141	0.133783	0.00365246	0.740815	0.278524	0.0083442	4.20774		121.143	6.70151	163669	42669.8	2.17109	0.147278	0.442358	1.74074	1	0.679844	0.337773	0.462764	0.486943	0.343066	0.165804			0.126003	0.292322
95	2019-03	2021-06	0.544955	0.509215	1655	0.438527	0.719158	0.671797	0.257532	0.99939	58.4722	0.426804		0.148167	0.135031	0.00372416	0.7311	0.258686	0.00593414	4.73018		87.4685	5.67688	200300	31718.9	1.30132	0.154361	0.612714	1.93862	1	0.553223	0.333437	0.44977	0.473738	0.343066	0.164161			0.137609	0.323147
96	2019-03	2021-07	0.546296	0.494878	1666	0.437385	0.720094	0.710157	0.262682	0.999512	57.8446	0.422223		0.129574	0.133928	0.00365728	0.761309	0.222394	0.00616273	4.07705		77.7439	5.97939	233901	14397	1.95164	0.139755	0.726665	2.0592	0.999371	0.853062	0.341545	0.467284	0.491787	0.335766	0.16422			0.129945	0.293519
97	2019-03	2021-08	0.559955	0.506435	1567	0.423743	0.731172	0.686549	0.269425	0.999512	58.6771	0.4283		0.101313	0.135333	0.0037109	0.737732	0.189486	0.00287985	4.5949		55.4775	4.75073	220934	11780.3	1.44522	0.12948	0.516077	1.74016	1	0.606921	0.336803	0.433388	0.450168	0.357664	0.167136			0.133489	0.326595
98	2019-03	2021-09	0.585648	0.557715	1432	0.398553	0.75113	0.807132	0.288628	0.999573	55.8749	0.407846	44991.4	0.131651	0.12379	0.00352557	0.749559	0.189486	0.000953899	3.81039		11.6628	2.84837	170331	15250.1	0.325925	0.128605	0.471132	1.75554	0.998678	0.799984	0.336901	0.461072	0.484805	0.357664	0.171019			0.10674	0.263938
99	2019-03	2021-10	0.576404	0.54646	1508	0.407898	0.743799	0.743167	0.291571	0.999573	57.7408	0.421466		0.121419	0.130769	0.00372297	0.744613	0.229278	0.000631748	4.23908		10.76	2.68962	212135	11110.9	0.387952	0.121735	0.573002	2.09077	1	0.783543	0.34058	0.465714	0.475232	0.357664	0.175057			0.11558	0.305536
100	2019-03	2021-11	0.584922	0.568813	1481	0.39973	0.750211	0.771541	0.296629	0.999695	55	0.40146		0.113466	0.12196	0.00343933	0.774771	0.221738	0.00238159	3.68908		34.023	4.2348	201466	14624.6	1.06552	0.146101	0.552157	2.93232	1	0.669554	0.347532	0.456851	0.469722	0.372263	0.179399			0.111387	0.254213
101	2019-03	2021-12	0.596536	0.573505	1421	0.388357	0.75903	0.789997	0.305371	0.999573	55.4707	0.404896	27965.4	0.13042	0.124816	0.0034316	0.751822	0.231288	0.00197956	3.74343		32.59	4.30816	214103	12149.5	1.01777	0.113571	0.57626	2.99725	0.999364	0.72977	0.338051	0.44522	0.457096	0.379562	0.181362			0.111004	0.263691
102	2019-04	2019-05	0.767511	0.856638	707	0.222467	0.874845	0.846041	0.53728	0.999878	43.0697	0.314377		0.123994	0.0728913	0.00247744	0.7922	0.133457	0.000741575	3.20376		9.83716	2.26662	40166.2	6642.21	0.380988	0.14452	0.268402	2.20716	1	0.684065	0.474139	0.573402	0.590607	0.328467	0.473151			0.0493281	0.195005
103	2019-04	2019-06	0.743752	0.82599	810	0.245603	0.860007	0.727659	0.482425	0.999878	54.6077	0.398596	40675.2	0.130589	0.115098	0.00326699	0.791498	0.134023	0.000575854	4.02279		11.1959	2.47332	31195.5	9659.91	0.240031	0.125021	0.377849	1.59142	0.998688	0.720749	0.450449	0.547795	0.564089	0.343066	0.194611			0.0555698	0.254281
104	2019-04	2019-07	0.723214	0.761781	868	0.2652	0.847129	0.874683	0.451063	0.999817	45.3431	0.330972	29657.2	0.107629	0.0814057	0.00266336	0.792245	0.154621	0.00117388	3.27361		32.7501	2.10935	66960.8	14592.3	1.09743	0.106158	0.326352	3.10697	1	0.65777	0.425484	0.530078	0.547788	0.350365	0.48309			0.0690845	0.213581
105	2019-04	2019-08	0.719019	0.704276	882	0.269231	0.844444	0.825562	0.445698	0.999695	49.4773	0.361148	26237.2	0.135641	0.0957758	0.00288313	0.755893	0.177109	0.000780241	3.49338		32.5714	2.19716	127738	15450.4	1.1098	0.101128	0.344755	2.33257	1	0.736332	0.428986	0.534309	0.548031	0.350365	0.191334			0.056505	0.21003
106	2019-04	2019-09	0.696716	0.731274	979	0.290936	0.829769	0.769739	0.417264	0.999756	51.3128	0.374546	35309.8	0.119419	0.103602	0.00301534	0.770853	0.170884	0.00157563	3.63331		44.0224	2.73851	92978.3	13106.9	1.06799	0.132554	0.409201	2.12377	1	0.663826	0.412633	0.517231	0.537444	0.343066	0.191637			0.0732018	0.229292
107	2019-04	2019-10	0.701932	0.665071	972	0.286051	0.833104	0.699059	0.428508	0.999573	56.8859	0.415225	21257.9	0.163628	0.127641	0.00350961	0.793493	0.158676	0.00624581	4.29589		98.9989	4.84091	157979	22101.9	1.8322	0.143502	0.384667	2.5278	1	0.679055	0.432122	0.529696	0.545498	0.343066	0.187103			0.0831639	0.297024
108	2019-04	2019-11	0.677976	0.678999	1063	0.309191	0.817134	0.742008	0.409543	0.999695	53.9537	0.393823	40310.6	0.165499	0.115539	0.00326749	0.77417	0.136199	0.00417295	3.92924		66.5291	4.28825	147309	12322.7	1.64511	0.094382	0.389141	2.0768	0.999347	0.613087	0.412137	0.513361	0.532834	0.343066	0.187169			0.077148	0.280907
109	2019-04	2019-12	0.647215	0.656498	1197	0.339093	0.795838	0.751771	0.38111	0.999573	54.4518	0.397458		0.158343	0.114905	0.00332723	0.798548	0.14833	0.00875413	3.85117		121.529	5.02691	175653	12334	2.22705	0.14031	0.384628	1.26762	0.99758	0.648777	0.388838	0.481293	0.482739	0.357664	0.18609			0.0957082	0.261292
110	2019-04	2020-01	0.639741	0.64944	1222	0.346274	0.79061	0.727255	0.378087	0.999573	55.4977	0.405093	43263.7	0.154652	0.119352	0.00336646	0.788	0.223854	0.00710443	3.99155		88.649	4.20901	173711	12956.3	1.98656	0.125453	0.318792	1.30089	0.924465	0.623871	0.387896	0.487781	0.500771	0.350365	0.185975			0.0984563	0.284401
111	2019-04	2020-02	0.638441	0.653937	1234	0.347606	0.789635	0.679787	0.373643	0.999634	56.4447	0.412005		0.181585	0.12432	0.00347704	0.763924	0.179408	0.0112545	3.82979		133.202	5.76882	180688	12491.4	2.53994	0.120156	0.298889	1.31153	0.977751	0.674602	0.399683	0.507475	0.520377	0.328467	0.186431			0.0920071	0.287446
112	2019-04	2020-03	0.621789	0.638196	1281	0.363507	0.777874	0.709	0.366256	0.999634	54.7083	0.399331		0.136304	0.116266	0.00331001	0.757095	0.153112	0.00707598	4.1258		88.4824	4.28668	137595	21367.4	1.85602	0.139451	0.322104	1.46409	0.974963	0.74881	0.385609	0.489737	0.502264	0.350365	0.184523			0.100148	0.245856
113	2019-04	2020-04	0.532497	0.300564	1453	0.447766	0.711535	0.776322	0.220394	0.999268	51.5461	0.376249	30077.2	0.159385	0.112079	0.00300592	0.777312	0.227036	0.0057931	4.40553		11.7359	4.81862	111788	68132	0.989354	0.127107	1.05348	3.05681	1	0.794132	0.296725	0.448114	0.466781	0.394161	0.170747			0.12103	0.258116
114	2019-04	2020-05	0.582803	0.324445	1310	0.399756	0.750191	0.780406	0.240235	0.999146	52.3068	0.381801		0.130908	0.108461	0.00322085	0.788742	0.188348	0.00303673	4.31717		33.844	3.4828	105398	65605.3	0.551391	0.132168	0.647272	2.18206	0.994319	0.633977	0.322901	0.453591	0.469986	0.40146	0.176134			0.103927	0.237294
115	2019-04	2020-06	0.591463	0.443872	1340	0.392157	0.756098	0.760522	0.269789	0.99939	54.2771	0.396183		0.152056	0.115373	0.00326381	0.792471	0.201734	0.00148497	4.17306		55.3511	2.82611	60182.2	61226.4	1.28451	0.109103	0.385371	2.52088	0.998621	0.728845	0.335097	0.45528	0.479161	0.379562	0.170536			0.125045	0.243481
116	2019-04	2020-07	0.594203	0.598572	1344	0.389678	0.758012	0.778779	0.274846	0.999451	55.857	0.407715		0.145397	0.120076	0.00333832	0.804242	0.158594	0.00269124	4.18689		55.353	2.60313	28816.6	42367.7	1.33955	0.146696	0.376706	2.12028	1	0.746008	0.328908	0.41652	0.424756	0.40146	0.164958			0.135427	0.274599
117	2019-04	2020-08	0.58111	0.608311	1366	0.402001	0.748435	0.767907	0.279277	0.999512	53.479	0.390357		0.132428	0.11241	0.00321941	0.756284	0.150667	0.00353235	4.09857		9.58317	3.0365	41060.8	31909.7	0.587509	0.120556	0.401979	3.12809	0.999293	0.708825	0.3232	0.416331	0.43709	0.40146	0.163399			0.123242	0.263598
118	2019-04	2020-09	0.572845	0.613783	1422	0.410271	0.741924	0.743254	0.272415	0.999451	53.6656	0.39172	12135.8	0.159308	0.113285	0.00320362	0.772191	0.14865	0.00444368	3.94329		76.4519	4.10065	31947.7	37477	1.9496	0.136387	0.430767	2.46662	1	0.730421	0.333832	0.399678	0.410067	0.40146	0.166715			0.129316	0.266285
119	2019-04	2020-10	0.551795	0.592746	1523	0.430835	0.725437	0.681126	0.266696	0.99939	54.7996	0.399997	27101.4	0.164218	0.117742	0.00331215	0.789988	0.160098	0.00474244	4.16346		98.9832	4.21398	48369.6	40361.4	1.85206	0.129917	0.365244	2.97478	1	0.660122	0.314311	0.387646	0.375876	0.408759	0.168088			0.146299	0.283713
120	2019-04	2020-11	0.56702	0.539923	1431	0.415747	0.737576	0.762795	0.273648	0.999207	52.9811	0.386724		0.138097	0.107759	0.00317607	0.781238	0.189936	0.0010598	3.90273		1.50516	1.45698	47707.9	52249.2	0.34459	0.121094	0.416294	1.43197	0.999043	0.750655	0.317848	0.41252	0.408427	0.416058	0.171501			0.131553	0.249166
121	2019-04	2020-12	0.574225	0.548947	1414	0.408907	0.743003	0.735966	0.276219	0.999207	54.7905	0.399931	26337.8	0.111047	0.115092	0.00326935	0.754135	0.136849	0.000797024	4.34611		11.1607	1.94526	61536.6	48654	0.580464	0.148508	0.365315	1.53589	0.980849	0.651837	0.320983	0.417194	0.415392	0.416058	0.175341			0.127833	0.251527
122	2019-04	2021-01	0.590868	0.540551	1353	0.392857	0.755556	0.753237	0.269892	0.99939	54.4885	0.397727	43499.1	0.111457	0.113959	0.00352385	0.781202	0.147543	0.000368471	4.30646		11.3401	2.14321	44504.3	51398.3	0.2681	0.140814	0.362792	1.4807	0.972394	0.739712	0.328459	0.438806	0.441972	0.40146	0.176772			0.120437	0.256573
123	2019-04	2021-02	0.571681	0.530288	1452	0.411681	0.740807	0.716589	0.260566	0.999268	55.1543	0.402586	44720.8	0.127897	0.118982	0.00329686	0.783711	0.164425	0.003858	4.17786		43.7805	4.00063	31652.5	56583.1	1.3133	0.107524	0.342018	2.28354	0.99932	0.740169	0.32753	0.439465	0.442548	0.394161	0.174132			0.128201	0.282668
124	2019-04	2021-03	0.563531	0.494698	1508	0.419822	0.73432	0.703423	0.255274	0.999207	55.6956	0.406537	17493.6	0.169374	0.122067	0.0033889	0.759353	0.193834	0.0104971	4.14032		121.337	5.40406	116124	52373.4	1.88088	0.137972	0.339131	1.60482	1	0.760551	0.330643	0.459868	0.471689	0.372263	0.166283			0.131537	0.28714
125	2019-04	2021-04	0.577816	0.495631	1473	0.406233	0.745112	0.695851	0.264489	0.999207	57	0.416058		0.166114	0.128673	0.00345912	0.778557	0.179847	0.0131535	3.91687		121.56	6.13621	140557	48561.9	2.5107	0.140382	0.30601	2.16379	0.978167	0.672169	0.343436	0.448283	0.462855	0.364964	0.164879			0.127686	0.274748
126	2019-04	2021-05	0.553085	0.497066	1608	0.430522	0.725691	0.609337	0.252976	0.999207	59.3127	0.43294	35336	0.200043	0.139477	0.00369617	0.828287	0.199214	0.0142096	4.25094		176.676	7.72307	165306	44645.3	2.92253	0.161704	0.416803	1.98379	1	0.730772	0.328999	0.443435	0.460288	0.357664	0.16588			0.121237	0.298374
127	2019-04	2021-06	0.548767	0.502897	1647	0.434909	0.722119	0.579697	0.259654	0.999268	60.291	0.44008		0.186905	0.142251	0.0038264	0.781029	0.229543	0.0109953	4.69357		142.993	6.36927	201940	33396.6	2.21086	0.162219	0.585966	2.52412	0.99936	0.700844	0.320697	0.44391	0.465635	0.357664	0.163857			0.131288	0.329317
128	2019-04	2021-07	0.560229	0.493507	1610	0.423907	0.731039	0.703764	0.268159	0.99939	58.2237	0.424991		0.169067	0.134893	0.00360413	0.79508	0.235482	0.0115415	4.13233		133.28	6.74818	235563	15480.7	2.7484	0.132208	0.690629	2.66395	0.999371	0.754954	0.331854	0.453963	0.468422	0.364964	0.165791			0.126813	0.322553
129	2019-04	2021-08	0.568622	0.508037	1537	0.415405	0.737848	0.611825	0.27238	0.99939	58.6259	0.427927		0.150238	0.134246	0.00363039	0.766207	0.201316	0.00706615	4.44312		111.014	5.5229	222611	12518.5	2.31419	0.13484	0.468666	1.82652	1	0.714232	0.325825	0.417094	0.427497	0.379562	0.168204			0.131501	0.320887
130	2019-04	2021-09	0.603373	0.559243	1364	0.381432	0.76434	0.739604	0.293271	0.999451	57.5326	0.419946	39572.3	0.139145	0.128421	0.00362355	0.790801	0.156679	0.00384766	4.24376		67.1778	3.5212	171966	16518.2	1.40223	0.101861	0.391248	2.10335	1	0.737589	0.338753	0.459755	0.477002	0.372263	0.172183			0.10763	0.277105
131	2019-04	2021-10	0.589975	0.550345	1456	0.394794	0.754054	0.631569	0.293417	0.999451	60.2329	0.439656	37572.9	0.138568	0.139609	0.00386139	0.78822	0.185588	0.00254456	4.75611		44.7886	2.89442	213802	11656.3	1.46071	0.077698	0.518073	1.19223	1	0.75533	0.332888	0.444479	0.446984	0.386861	0.175559			0.11522	0.313832
132	2019-04	2021-11	0.599831	0.561493	1423	0.385324	0.761362	0.717146	0.296796	0.999573	56.2406	0.410515		0.137882	0.122824	0.00346701	0.772673	0.194421	0.00550832	3.89633		89.5508	5.02578	203114	15692.4	1.98282	0.134815	0.492625	1.79782	1	0.765825	0.348611	0.447022	0.454621	0.379562	0.179651			0.107003	0.277751
133	2019-04	2021-12	0.614441	0.567112	1351	0.371052	0.772214	0.746159	0.310336	0.999451	57.6975	0.42115	42999.6	0.1152	0.128867	0.00352032	0.76247	0.182492	0.00211702	4.2446		22.987	3.90944	215788	12548.4	0.41006	0.0843277	0.541519	2.00107	1	0.702489	0.346012	0.451028	0.447852	0.386861	0.18273			0.104418	0.267385
134	2019-05	2019-06	0.796483	0.887276	625	0.194825	0.892074	0.7534	0.560884	0.999878	54.2125	0.395712		0.112678	0.112879	0.00333871	0.786002	0.148529	0.00176159	4.04475		2.54589	1.81629	10091	4714.43	0.357231	0.13201	0.254375	1.68617	0.999345	0.626088	0.489695	0.596747	0.615742	0.313869	0.195072			0.0391911	0.272906
135	2019-05	2019-07	0.776938	0.845853	679	0.213455	0.880521	0.904974	0.532017	0.999817	36.0139	0.262875	28840.9	0.103833	0.0511879	0.00222299	0.765993	0.153888	0.00137219	2.99037		23.1138	1.60833	27042.4	9282.33	0.922383	0.163665	0.24175	1.78726	0.996151	0.741428	0.465301	0.575944	0.590932	0.313869	0.577144			0.053805	0.184903
136	2019-05	2019-08	0.757566	0.782437	745	0.232087	0.868722	0.791938	0.508275	0.999817	52.6972	0.384651	40571.9	0.0929624	0.106417	0.0031412	0.782116	0.137371	0.000784065	3.68654		22.9147	1.29904	87624.8	9729.25	0.938531	0.157594	0.259312	1.5219	0.99548	0.728297	0.452139	0.582293	0.597124	0.313869	0.191243			0.0445654	0.249442
137	2019-05	2019-09	0.738662	0.811763	824	0.250456	0.856845	0.774297	0.488463	0.999878	52.4214	0.382638	44588.7	0.124668	0.106931	0.00316782	0.755169	0.134871	0.00191082	3.67658		34.4012	1.91483	52874.2	7317.82	0.880875	0.153382	0.31863	1.84748	0.99802	0.648011	0.440234	0.548266	0.572221	0.321168	0.192012			0.0611488	0.253868
138	2019-05	2019-10	0.741925	0.736213	823	0.247444	0.858809	0.721683	0.481512	0.999695	56.6304	0.41336	32042.4	0.127875	0.125374	0.00354862	0.751749	0.126739	0.00783053	4.37175		89.336	4.14089	117845	15900.9	1.67395	0.14217	0.331229	1.9799	0.998046	0.786129	0.462229	0.567571	0.597983	0.306569	0.187911			0.0671634	0.318504
139	2019-05	2019-11	0.701135	0.73264	974	0.286808	0.832589	0.736237	0.441309	0.999695	54.1849	0.39551		0.115304	0.11589	0.00335528	0.750048	0.123682	0.00534676	4.16889		56.9007	3.35474	107191	8115.53	1.47916	0.129935	0.33802	2.14329	0.997548	0.691866	0.428079	0.528352	0.549852	0.328467	0.187363			0.0747379	0.300459
140	2019-05	2019-12	0.676859	0.702325	1078	0.310394	0.816292	0.758499	0.418281	0.999695	54.2586	0.396048		0.124607	0.11519	0.0032959	0.774066	0.115465	0.0113943	3.75503		111.875	5.25627	135556	8205.17	2.0781	0.143957	0.349809	2.10264	0.999353	0.697109	0.405629	0.504572	0.522878	0.335766	0.187429			0.0902217	0.272488
141	2019-05	2020-01	0.662784	0.693967	1129	0.32396	0.806711	0.759399	0.408651	0.999695	55.6866	0.406472		0.145047	0.121481	0.0034038	0.72819	0.170523	0.00977662	3.85491		79.0113	4.67297	133621	9207.66	1.84645	0.161196	0.304327	2.14789	1	0.735669	0.397153	0.495107	0.515863	0.335766	0.18662			0.0901621	0.304739
142	2019-05	2020-02	0.65837	0.698615	1153	0.328303	0.803611	0.690999	0.395876	0.999756	54.6717	0.399064	14093.3	0.157132	0.118095	0.00341332	0.778757	0.156346	0.0137511	3.89602		123.561	6.23005	140580	8844.63	2.40429	0.15868	0.299492	2.28685	1	0.719973	0.414428	0.525128	0.546426	0.313869	0.187162			0.0832941	0.299005
143	2019-05	2020-03	0.645123	0.675744	1186	0.340903	0.794525	0.687539	0.380002	0.999634	55.0454	0.401792	17797.5	0.127276	0.118969	0.00337537	0.771385	0.168229	0.00967163	4.18039		78.8391	4.74889	97802.1	26119.9	1.71089	0.141305	0.280086	2.22418	1	0.757568	0.40942	0.523865	0.541761	0.335766	0.184354			0.0875638	0.27102
144	2019-05	2020-04	0.551578	0.27153	1378	0.429283	0.726696	0.732044	0.227106	0.999268	50.9117	0.371618		0.153236	0.11001	0.00305401	0.768389	0.291315	0.00354029	4.3058		21.3842	4.46366	151007	73875.9	1.15934	0.165368	1.15722	1.8089	1	0.770952	0.308052	0.445338	0.452868	0.386861	0.170482			0.111372	0.258454
145	2019-05	2020-05	0.592	0.294084	1275	0.390865	0.757097	0.773702	0.245242	0.999146	51.4101	0.375256	26181.7	0.122553	0.105759	0.00313883	0.740563	0.276991	0.0018734	4.15143		43.5075	3.48257	144484	71336.5	0.786144	0.130444	0.7477	1.39725	0.999277	0.677275	0.328453	0.478394	0.498004	0.386861	0.176905			0.0863007	0.227736
146	2019-05	2020-06	0.597859	0.401641	1315	0.38597	0.760866	0.759903	0.273476	0.99939	53.2259	0.38851	20551.8	0.127753	0.110798	0.00323614	0.763912	0.263085	0.00143329	4.15108		45.7235	3.10277	97827.3	66899.7	1.13801	0.155269	0.442612	1.20324	0.999311	0.706328	0.330019	0.447937	0.459994	0.379562	0.171055			0.116336	0.247645
147	2019-05	2020-07	0.606383	0.586211	1295	0.377882	0.767044	0.774502	0.287373	0.999451	55.3082	0.40371		0.12629	0.117774	0.00342007	0.767714	0.168306	0.00294046	4.37166		45.7239	3.09338	33680.3	48155.8	1.18406	0.149906	0.363492	1.48882	1	0.725933	0.336752	0.432464	0.435763	0.386861	0.165417			0.12311	0.298169
148	2019-05	2020-08	0.60429	0.633622	1273	0.379547	0.765777	0.796267	0.298139	0.999512	51.7784	0.377944		0.112223	0.10403	0.00306877	0.744161	0.160113	0.00218457	3.68383		1.14302	1.51937	23369.2	37585.2	0.459299	0.152191	0.410273	2.04014	0.999294	0.802558	0.342152	0.43928	0.459586	0.394161	0.164023			0.116352	0.249201
149	2019-05	2020-09	0.592525	0.612796	1341	0.39119	0.756845	0.722581	0.289768	0.999451	52.6972	0.384651	20452.5	0.140789	0.110113	0.0031665	0.724934	0.122303	0.00454697	3.9166		66.7745	4.05134	28924.8	43233.2	1.80169	0.150829	0.45183	1.98748	1	0.731294	0.35065	0.433048	0.445276	0.386861	0.167255			0.118517	0.268153
150	2019-05	2020-10	0.573174	0.622228	1432	0.41008	0.742075	0.690201	0.274454	0.99939	54	0.394161	37847.6	0.133985	0.114569	0.00332657	0.776972	0.181362	0.00498038	4.08696		89.3208	4.36014	22837.1	45963.8	1.70009	0.135277	0.394525	2.02825	0.999313	0.694133	0.32599	0.415378	0.423496	0.386861	0.168852			0.129922	0.295489
151	2019-05	2020-11	0.588235	0.567837	1344	0.395178	0.753756	0.775319	0.283329	0.999207	50.8134	0.370901		0.146681	0.100627	0.00305678	0.795365	0.229574	0.000787198	3.6488		10.5465	2.3768	24717.9	57839.8	0.569758	0.169986	0.484643	2.28101	1	0.75373	0.337389	0.440571	0.435594	0.394161	0.172253			0.119578	0.230157
152	2019-05	2020-12	0.587682	0.57633	1359	0.395864	0.753223	0.743417	0.283385	0.999207	53.9166	0.393552	37395.8	0.13692	0.113518	0.00331125	0.74427	0.186944	0.00069235	4.21132		20.8949	1.84738	27054	54278.1	0.771261	0.1512	0.416512	2.66334	1	0.707898	0.325227	0.436699	0.435421	0.40146	0.175972			0.117759	0.265095
153	2019-05	2021-01	0.605977	0.568258	1292	0.37822	0.766787	0.710148	0.27248	0.99939	53.8331	0.392942		0.130089	0.113263	0.0035015	0.762656	0.156986	0.000984633	4.44853		21.0488	2.68696	21831	57086.6	0.437239	0.156165	0.452275	1.61153	1	0.697719	0.341815	0.445653	0.445498	0.40146	0.176767			0.107323	0.275047
154	2019-05	2021-02	0.584373	0.52699	1399	0.399372	0.75049	0.705525	0.259488	0.999268	54.3047	0.396385		0.140593	0.117514	0.00330055	0.777738	0.207699	0.00509292	4.28058		34.1322	3.97603	27600	62300.4	1.15921	0.157435	0.421209	1.60965	1	0.735245	0.337287	0.460839	0.472244	0.372263	0.174383			0.119109	0.290754
155	2019-05	2021-03	0.576385	0.520913	1453	0.407345	0.744235	0.684337	0.260076	0.999207	54.9818	0.401327	31870.1	0.143244	0.121476	0.00339285	0.766012	0.216518	0.0128614	4.15445		111.679	5.6875	77078.1	58055.2	1.73896	0.172603	0.378621	2.28447	1	0.686124	0.346003	0.48153	0.480672	0.372263	0.166511			0.121157	0.290621
156	2019-05	2021-04	0.598955	0.521513	1382	0.38571	0.761065	0.728658	0.275015	0.999207	56.8331	0.41484		0.151277	0.129994	0.00355841	0.786235	0.183876	0.015941	3.9389		111.907	6.66522	101129	54245.6	2.38757	0.191349	0.320263	1.97396	1	0.719972	0.35631	0.470515	0.492416	0.357664	0.165326			0.117342	0.304782
157	2019-05	2021-05	0.571067	0.523438	1527	0.413038	0.739731	0.677931	0.265357	0.999207	58.7622	0.428921	33439.9	0.179798	0.138	0.00367597	0.745482	0.246966	0.016339	4.10439		167.016	8.06694	125658	50342	2.80689	0.190781	0.3605	1.76798	0.998064	0.708477	0.344807	0.465425	0.485761	0.350365	0.166316			0.111691	0.299899
158	2019-05	2021-06	0.56428	0.532889	1576	0.419819	0.734322	0.603035	0.266126	0.999268	60.7124	0.443156		0.187385	0.144547	0.00391095	0.731479	0.253826	0.0135896	4.74686		133.324	5.76953	162121	39072.9	2.0726	0.176899	0.470418	1.76319	1	0.697322	0.339812	0.455687	0.476025	0.357664	0.164204			0.119426	0.332578
159	2019-05	2021-07	0.573631	0.529513	1549	0.410875	0.741446	0.73412	0.277366	0.99939	58.2323	0.425053		0.152424	0.133787	0.00364444	0.760094	0.222094	0.0137353	3.92985		123.639	6.14965	195689	21183.2	2.62655	0.163539	0.576558	1.79254	1	0.772407	0.344409	0.458242	0.477005	0.350365	0.16591			0.120948	0.328217
160	2019-05	2021-08	0.578442	0.55041	1494	0.405868	0.745399	0.608374	0.286771	0.99939	58.9067	0.429976		0.125054	0.134616	0.00373733	0.758377	0.214903	0.00850545	4.7215		101.375	4.85283	182681	17623.3	2.1838	0.170651	0.375079	1.56747	1	0.706982	0.347278	0.434839	0.448236	0.372263	0.168147			0.123017	0.33957
161	2019-05	2021-09	0.618001	0.596497	1303	0.367249	0.775073	0.755073	0.304797	0.999451	56.9473	0.415674	23576.8	0.130038	0.124941	0.0036097	0.75997	0.169932	0.00468046	4.31209		57.581	2.67176	132274	21851.3	1.24094	0.169436	0.332891	1.60757	0.999339	0.589278	0.352869	0.46958	0.487887	0.364964	0.172809			0.0948205	0.27923
162	2019-05	2021-10	0.60085	0.584089	1409	0.384238	0.762194	0.618293	0.308861	0.999451	60.3738	0.440685	45094.7	0.135496	0.139764	0.00397809	0.765052	0.243931	0.00375717	4.60842		35.2084	2.44931	173924	16070	1.30403	0.138185	0.415962	1.97264	1	0.681366	0.350807	0.459008	0.459644	0.379562	0.175886			0.106052	0.330415
163	2019-05	2021-11	0.60802	0.595959	1388	0.377379	0.767426	0.716075	0.306287	0.999573	56.0535	0.40915		0.127755	0.122577	0.00348702	0.746925	0.236758	0.00786134	3.92224		79.9427	4.34479	163270	20550.9	1.85546	0.147528	0.399035	2.90013	1	0.693711	0.355932	0.459473	0.474278	0.372263	0.179941			0.110284	0.274717
164	2019-05	2021-12	0.620956	0.60258	1324	0.364738	0.776954	0.725239	0.318213	0.999451	57.4456	0.419311	31636.6	0.107767	0.128253	0.00357493	0.741951	0.208866	0.00422265	3.98692		13.6283	3.31341	175811	16690.9	0.331113	0.135303	0.444434	2.9318	1	0.655291	0.346468	0.454675	0.453313	0.386861	0.183329			0.109369	0.279449
165	2019-06	2019-07	0.808871	0.876946	586	0.182953	0.899313	0.737378	0.597751	0.999939	55.1362	0.402454	37342.1	0.118492	0.11689	0.00339776	0.728639	0.152319	0.00104159	4.17206		21.5652	1.46826	36089.5	5909.32	1.03315	0.109097	0.261562	2.17935	1	0.736045	0.494616	0.61064	0.618314	0.313869	0.194062			0.0418323	0.284651
166	2019-06	2019-08	0.784149	0.816227	670	0.206726	0.884721	0.744761	0.573207	0.999817	55.3715	0.404171		0.116724	0.117212	0.00342654	0.757187	0.155756	0.000927071	4.06599		21.393	1.51568	96919.1	6445.79	1.05149	0.118887	0.284448	1.54695	1	0.795021	0.474335	0.624179	0.639366	0.306569	0.192277			0.0294429	0.276924
167	2019-06	2019-09	0.7631	0.82733	755	0.227136	0.871882	0.71961	0.526609	0.999878	56.1694	0.409996	44086.3	0.126528	0.120714	0.00351652	0.758457	0.145803	0.00114794	4.03151		32.8297	1.98942	62150.2	4585.43	0.999834	0.125951	0.247769	1.31511	0.999357	0.625268	0.459931	0.578891	0.604666	0.306569	0.192452			0.0458736	0.274199
168	2019-06	2019-10	0.757333	0.745308	786	0.23282	0.868253	0.739564	0.510198	0.999695	52.2494	0.381382		0.13443	0.106179	0.00323353	0.772586	0.139333	0.00455236	3.66035		87.8076	3.50516	127114	13327.2	1.78058	0.113268	0.251388	1.69834	1	0.775204	0.477036	0.591983	0.61874	0.291971	0.190965			0.0517374	0.266615
169	2019-06	2019-11	0.712176	0.737452	955	0.276411	0.839631	0.776917	0.452693	0.999817	51.3323	0.374688		0.139507	0.102225	0.00314769	0.746777	0.137397	0.0026987	3.8517		55.3347	2.82254	116470	7615.86	1.58878	0.0954641	0.243143	1.39215	0.999364	0.623976	0.435715	0.54835	0.574321	0.321168	0.385278			0.0662572	0.280066
170	2019-06	2019-12	0.685093	0.707142	1071	0.302713	0.821649	0.737672	0.433903	0.999695	54.3599	0.396788		0.13385	0.114112	0.00335904	0.738962	0.149943	0.00641727	3.89576		110.335	4.66526	144790	7756.07	2.17572	0.128784	0.268633	1.44214	1	0.689745	0.411184	0.530704	0.540708	0.321168	0.188509			0.0772248	0.267575
171	2019-06	2020-01	0.667836	0.69081	1136	0.31937	0.80997	0.785822	0.409487	0.999695	51.5364	0.376178	13803.8	0.147902	0.103372	0.00315425	0.749029	0.218082	0.00477067	3.71047		77.4546	4.08628	142898	9272.61	1.93543	0.131259	0.312025	1.44416	0.999366	0.683943	0.411396	0.534299	0.547361	0.321168	0.190073			0.0825153	0.260721
172	2019-06	2020-02	0.66783	0.683094	1142	0.319441	0.80992	0.743641	0.400246	0.999756	54.2771	0.396183	30469.4	0.163751	0.115359	0.00337259	0.753778	0.199051	0.0087552	3.6855		122.008	5.66581	149883	8248.39	2.48991	0.110286	0.296247	1.43157	1	0.746877	0.417382	0.545112	0.563972	0.306569	0.325234			0.0791387	0.276135
173	2019-06	2020-03	0.641421	0.647619	1231	0.344818	0.791674	0.68278	0.377601	0.999634	56.0625	0.409215	26949.7	0.145542	0.122054	0.00346446	0.75017	0.187955	0.00483757	4.25549		77.2885	4.19979	107111	28981.3	1.80168	0.136575	0.321529	1.6035	1	0.753567	0.402519	0.544721	0.569789	0.328467	0.185553			0.077338	0.251415
174	2019-06	2020-04	0.536654	0.26882	1479	0.444278	0.714424	0.711263	0.228224	0.99939	52.9623	0.386586		0.169632	0.122096	0.00323687	0.757796	0.237329	0.00838454	4.66205		22.9211	5.93921	142393	76428.3	1.10342	0.140898	1.34336	2.47359	1	0.709386	0.3	0.456744	0.475862	0.386861	0.171507			0.114085	0.277997
175	2019-06	2020-05	0.59451	0.293774	1300	0.388872	0.758633	0.7268	0.254648	0.999268	54.074	0.394701		0.143648	0.119761	0.0034118	0.774781	0.252677	0.0052518	4.70095		45.0396	4.61235	135909	73881.8	0.65741	0.142592	0.918196	1.55098	1	0.696012	0.327071	0.502283	0.530062	0.372263	0.177608			0.0907221	0.277715
176	2019-06	2020-06	0.602032	0.398237	1332	0.382319	0.763662	0.701129	0.277059	0.999512	56.4624	0.412134		0.14784	0.127304	0.00354063	0.794435	0.247798	0.00181178	4.67038		44.1575	3.48975	89671	69430.7	1.23492	0.124625	0.589307	1.97271	1	0.693676	0.33922	0.482487	0.507461	0.350365	0.171892			0.107779	0.30496
177	2019-06	2020-07	0.615133	0.579893	1292	0.369777	0.773174	0.73994	0.295399	0.999573	56.7627	0.414326		0.119422	0.125528	0.00353933	0.763771	0.175583	0.00230408	4.56114		44.1597	3.44494	29556.4	50594.2	1.27465	0.0896403	0.48644	1.56587	1	0.692358	0.346283	0.476138	0.487671	0.364964	0.165953			0.105484	0.284945
178	2019-06	2020-08	0.615244	0.621539	1262	0.36933	0.77351	0.749622	0.30091	0.999634	54.0925	0.394836		0.138859	0.115804	0.00336272	0.775507	0.186128	0.0048521	4.26283		3.63	2.91663	24505.9	40079.5	0.506794	0.1281	0.547859	2.40898	1	0.709168	0.353602	0.478326	0.49708	0.372263	0.165202			0.100927	0.302446
179	2019-06	2020-09	0.597268	0.611464	1356	0.386986	0.760085	0.692924	0.291859	0.999573	55.0091	0.401526	38316.7	0.156793	0.120155	0.00337194	0.775892	0.132942	0.00403708	4.31535		65.2652	4.20701	26102.6	45639.1	1.89573	0.129206	0.606131	1.73272	1	0.753456	0.359671	0.47448	0.496135	0.364964	0.16817			0.0995243	0.293819
180	2019-06	2020-10	0.583333	0.604271	1425	0.400618	0.749517	0.775116	0.284628	0.999512	52.0865	0.380193	43898.5	0.14602	0.10721	0.00321719	0.762193	0.168866	0.00421225	3.70732		87.7918	4.32558	27492	48384.6	1.79246	0.125346	0.540446	2.07334	1	0.727808	0.330675	0.450901	0.444988	0.372263	0.325445			0.118974	0.281435
181	2019-06	2020-11	0.591208	0.550068	1367	0.392703	0.755675	0.73462	0.285619	0.999329	55.7584	0.406996	38659.9	0.137501	0.121025	0.00348176	0.781544	0.232284	0.00183194	4.36788		12.1423	3.20121	28622.3	60287.5	0.414027	0.122875	0.643356	1.59308	1	0.671491	0.339769	0.477001	0.481734	0.372263	0.173076			0.106733	0.307545
182	2019-06	2020-12	0.586879	0.559757	1398	0.397046	0.752303	0.765373	0.283912	0.999329	54.074	0.394701	27532.5	0.120118	0.114612	0.00331852	0.75748	0.161424	0.00165381	4.18181		22.3563	2.62344	35273.7	56731.1	0.675095	0.113376	0.565657	1.95811	0.996399	0.717762	0.330867	0.460157	0.466609	0.386861	0.177623			0.106887	0.26835
183	2019-06	2021-01	0.606124	0.552247	1325	0.378463	0.766602	0.803753	0.278233	0.999512	51.7591	0.377803	30659.8	0.139008	0.106937	0.00331132	0.764147	0.137515	0.000896608	4.24612		22.5353	3.31951	25237.5	59482.2	0.30181	0.133098	0.616768	1.288	0.999328	0.741997	0.350111	0.482123	0.486202	0.372263	0.17948			0.0995634	0.254072
184	2019-06	2021-02	0.589654	0.526869	1412	0.394634	0.754178	0.763217	0.261376	0.99939	54.1295	0.395106	43800.5	0.152147	0.118599	0.00330167	0.7425	0.182501	0.00280931	4.11356		32.5926	4.12459	25138	64764.9	1.26757	0.103294	0.58397	1.67097	0.999338	0.735016	0.33749	0.492483	0.50476	0.357664	0.320952			0.107405	0.269178
185	2019-06	2021-03	0.58672	0.506819	1444	0.397687	0.751805	0.69617	0.267531	0.999329	54.5344	0.398061		0.157264	0.119771	0.00334907	0.762587	0.197369	0.00816041	3.97701		110.144	5.3799	86465	60477.6	1.83625	0.154645	0.505959	1.38179	1	0.783166	0.348814	0.479908	0.486921	0.364964	0.168192			0.118254	0.254196
186	2019-06	2021-04	0.60244	0.50762	1401	0.382682	0.763385	0.61119	0.277353	0.999329	59.0339	0.430904		0.176578	0.13926	0.00365637	0.75442	0.209428	0.010644	4.55293		110.367	6.10969	110398	56711	2.47206	0.159594	0.418012	1.59756	0.998729	0.676673	0.358656	0.474453	0.502828	0.350365	0.165609			0.113987	0.291649
187	2019-06	2021-05	0.575041	0.507552	1546	0.409536	0.742505	0.666481	0.271638	0.999329	59.127	0.431584		0.186446	0.139547	0.00371899	0.775223	0.26987	0.0118984	4.33625		165.483	7.53025	134984	52818.5	2.88579	0.163302	0.396788	1.4546	1	0.727795	0.34556	0.479374	0.495964	0.343066	0.167964			0.10602	0.302294
188	2019-06	2021-06	0.572165	0.521681	1577	0.412503	0.740155	0.589162	0.277887	0.99939	59.9083	0.437287	30349.6	0.176745	0.139825	0.00383808	0.769067	0.245355	0.00847776	4.92571		131.802	5.19509	171580	41406.5	2.16599	0.158069	0.400777	1.76531	1	0.637701	0.339993	0.468507	0.491511	0.350365	0.165857			0.114284	0.332114
189	2019-06	2021-07	0.590761	0.520894	1506	0.394551	0.754243	0.703371	0.2922	0.999512	59.649	0.435394		0.158884	0.138987	0.0037746	0.775228	0.253812	0.00914051	4.45192		122.085	5.28266	205057	23086.1	2.70566	0.115924	0.444754	1.87722	0.999388	0.671705	0.35006	0.478902	0.498728	0.343066	0.166308			0.114517	0.309002
190	2019-06	2021-08	0.590178	0.538067	1477	0.394814	0.754038	0.664203	0.298378	0.999512	59.5735	0.434843		0.143928	0.137323	0.00379793	0.761636	0.201627	0.00556042	4.56903		99.8189	4.06496	192064	19299.4	2.26494	0.144591	0.300945	1.12226	0.998113	0.584918	0.35173	0.457464	0.468603	0.364964	0.168208			0.111234	0.317622
191	2019-06	2021-09	0.629971	0.583055	1284	0.355974	0.783474	0.762347	0.315807	0.999573	54.7905	0.399931		0.131256	0.115418	0.00342101	0.745482	0.18313	0.00281319	3.83367		55.9819	2.09699	141677	24029.9	1.34473	0.145934	0.261524	1.25745	1	0.657759	0.357923	0.488491	0.510336	0.357664	0.173275			0.0882003	0.256514
192	2019-06	2021-10	0.615857	0.573622	1376	0.369992	0.773012	0.690868	0.316887	0.999573	59.6657	0.435516	19567.4	0.131978	0.136302	0.00382131	0.747665	0.228161	0.00147146	4.34624		33.593	1.65647	183292	18256.2	1.39837	0.12177	0.309317	1.20014	1	0.747313	0.362464	0.487926	0.49626	0.364964	0.177186			0.095142	0.300251
193	2019-06	2021-11	0.617027	0.581638	1381	0.368955	0.773792	0.736846	0.31639	0.999573	55.6327	0.406078		0.125836	0.118996	0.00344725	0.754925	0.215271	0.00351505	3.86099		78.3549	3.46002	172659	22783.7	1.93254	0.124371	0.287293	1.98011	1	0.578019	0.360244	0.46952	0.479601	0.364964	0.180965			0.101006	0.252496
194	2019-06	2021-12	0.62939	0.587464	1319	0.356872	0.782809	0.734729	0.326715	0.999573	55.4166	0.404501		0.104841	0.117868	0.0033811	0.769825	0.218657	0.000847474	3.91895		11.8033	2.42389	185198	18885.8	0.365539	0.116811	0.312806	2.24933	0.999381	0.594155	0.357213	0.472049	0.478559	0.379562	0.183641			0.10362	0.262188
195	2019-07	2019-08	0.801593	0.872765	598	0.189781	0.895161	0.826904	0.61163	0.999878	53.2729	0.388853		0.101224	0.108084	0.00324683	0.747612	0.164176	0.000134419	4.04716		0.361023	0.650369	61149.3	4098.57	0.107541	0.0813473	0.205166	1.32964	0.995256	0.669449	0.498105	0.619055	0.64995	0.291971	0.190412			0.0397247	0.267806
196	2019-07	2019-09	0.76578	0.870053	731	0.224371	0.873639	0.811535	0.544043	0.999817	52.4881	0.383125	33095.9	0.106797	0.105755	0.00315703	0.730177	0.162719	0.000159852	3.84305		11.2902	0.938428	26412.1	5281.08	0.18834	0.138684	0.224969	1.90055	1	0.721668	0.47653	0.590654	0.624349	0.306569	0.191127			0.0556272	0.264766
197	2019-07	2019-10	0.754871	0.790044	780	0.235011	0.866849	0.728609	0.51684	0.999634	56.6216	0.413296	15813.8	0.122199	0.12389	0.00351298	0.778552	0.145503	0.00360629	4.27494		66.2511	3.0804	91209.9	9469.78	0.981859	0.11774	0.315501	1.66722	0.993288	0.704788	0.473334	0.590417	0.625022	0.291971	0.187291			0.0651727	0.304494
198	2019-07	2019-11	0.700122	0.76694	983	0.287848	0.83188	0.766703	0.444323	0.999756	55.0727	0.40199	42704.4	0.118591	0.117503	0.00338519	0.765575	0.163231	0.00176809	4.27612		33.7934	2.40609	80680.7	10633.9	0.78284	0.110462	0.277502	2.12814	0.998702	0.763876	0.425886	0.544999	0.575428	0.313869	0.186649			0.0829924	0.314925
199	2019-07	2019-12	0.681519	0.734671	1065	0.305947	0.8194	0.800362	0.432708	0.999634	54.3967	0.397056		0.122636	0.114876	0.00330281	0.760875	0.176701	0.00600843	3.6248		88.7843	4.24645	109054	10727.2	1.4475	0.133775	0.302102	2.82637	1	0.793382	0.417295	0.515777	0.535338	0.306569	0.186151			0.0959337	0.289012
200	2019-07	2020-01	0.66399	0.718332	1130	0.322857	0.807496	0.761836	0.408837	0.999634	55.6417	0.406144	43095	0.12524	0.120296	0.00339564	0.778455	0.215052	0.00469397	4.11588		55.9101	3.55268	107220	12414.9	1.20678	0.106144	0.296654	2.63052	0.999353	0.709631	0.404853	0.516275	0.550944	0.321168	0.185781			0.101112	0.27937
201	2019-07	2020-02	0.66253	0.709937	1142	0.32434	0.806441	0.735906	0.400089	0.999695	55.3534	0.404039		0.144846	0.119727	0.00348588	0.752238	0.210541	0.00791073	3.90012		100.463	5.1702	114139	10975.8	1.81641	0.124427	0.307596	3.06488	0.999356	0.722558	0.41184	0.537917	0.559179	0.29927	0.18619			0.0962957	0.289884
202	2019-07	2020-03	0.636175	0.671021	1229	0.349644	0.78814	0.710178	0.36486	0.999573	54.9818	0.401327		0.120596	0.117444	0.00336688	0.72792	0.187197	0.004676	4.13608		55.7407	3.59835	71931.9	34331	1.06129	0.152487	0.266672	2.75369	0.999347	0.657762	0.393188	0.524811	0.55733	0.321168	0.183918			0.0988179	0.272048
203	2019-07	2020-04	0.540957	0.249456	1429	0.439692	0.718202	0.779946	0.22469	0.999329	51.4879	0.375824		0.153732	0.112911	0.0030754	0.772801	0.26806	0.00627459	4.48865		44.4453	5.25267	177692	81765.4	1.82851	0.140744	1.23094	1.60693	1	0.794204	0.293584	0.437213	0.452702	0.394161	0.169854			0.126383	0.273798
204	2019-07	2020-05	0.584046	0.272662	1314	0.398665	0.751042	0.807799	0.247761	0.999207	52.1344	0.380543		0.134698	0.110168	0.00326491	0.750621	0.257149	0.00475597	4.58582		66.5778	4.40965	171146	79213.9	1.40351	0.145447	0.820563	2.09761	0.997847	0.755763	0.320959	0.469478	0.483152	0.386861	0.176011			0.10598	0.261919
205	2019-07	2020-06	0.595021	0.37108	1334	0.388808	0.758683	0.782907	0.271771	0.999451	54.3691	0.396855		0.116836	0.116256	0.00332189	0.74784	0.273238	0.000319685	4.25298		22.6142	2.35836	124278	74791.2	0.361983	0.125823	0.499172	1.49609	1	0.693541	0.329898	0.469722	0.49908	0.372263	0.170457			0.124174	0.277315
206	2019-07	2020-07	0.62111	0.54333	1242	0.36369	0.777738	0.794902	0.295445	0.999512	56.3738	0.411487	45604.3	0.120868	0.122125	0.00347422	0.787845	0.173409	0.000659196	4.35282		22.6157	2.38461	56757.4	55854.1	0.387315	0.116417	0.418934	1.66045	0.995841	0.729238	0.350976	0.471633	0.484407	0.364964	0.164867			0.125446	0.307078
207	2019-07	2020-08	0.615313	0.59286	1236	0.368955	0.773792	0.799977	0.294912	0.999573	52.8394	0.385689		0.117139	0.107735	0.00317889	0.774189	0.172133	0.00344625	4.01504		23.6863	2.32506	40642.5	45364.9	0.798282	0.134283	0.449788	1.32123	1	0.755616	0.345579	0.463163	0.482401	0.372263	0.163454			0.114401	0.279142
208	2019-07	2020-09	0.595519	0.572044	1336	0.388372	0.759019	0.778796	0.289861	0.999512	52.5738	0.38375		0.12437	0.10841	0.00315469	0.753819	0.16251	0.00188657	3.98539		43.7022	3.40541	50951.9	50920.2	1.09106	0.150595	0.516172	1.59608	1	0.70183	0.348453	0.467438	0.491384	0.357664	0.166836			0.115505	0.263496
209	2019-07	2020-10	0.580405	0.585134	1409	0.403147	0.747536	0.735112	0.281223	0.999451	54.5619	0.398262	28856.6	0.135102	0.116215	0.00338085	0.768751	0.175317	0.00212393	4.23396		66.2355	3.46247	34768.9	53714.8	0.987418	0.151495	0.481569	1.69536	0.991051	0.698412	0.331569	0.45603	0.462038	0.357664	0.168149			0.130474	0.293355
210	2019-07	2020-11	0.595165	0.532284	1323	0.388546	0.758885	0.779869	0.286365	0.999268	51.9326	0.37907	41206.9	0.141848	0.105803	0.0032024	0.790896	0.236554	0.00154548	3.95677		33.6141	2.47277	37683.4	65651.8	1.25621	0.100165	0.568533	3.08481	0.998613	0.809651	0.336949	0.46435	0.467158	0.372263	0.171741			0.124193	0.272618
211	2019-07	2020-12	0.590689	0.567462	1354	0.393033	0.755419	0.771886	0.278874	0.999268	54.5527	0.398195	32276	0.127114	0.11775	0.00335207	0.74719	0.186777	0.00181084	4.3882		43.9071	1.99868	24325.7	62105.5	1.44322	0.147464	0.470402	3.68013	1	0.729524	0.331449	0.449945	0.453646	0.394161	0.17524			0.124878	0.295492
212	2019-07	2021-01	0.600665	0.525549	1321	0.383454	0.762794	0.741147	0.273742	0.999451	54.5069	0.39786		0.117829	0.11719	0.00348568	0.792631	0.133292	0.00124996	4.38703		44.079	2.60272	36913.1	64844.4	1.05879	0.138818	0.546552	2.5304	1	0.752849	0.335528	0.476459	0.491286	0.379562	0.176287			0.11964	0.28507
213	2019-07	2021-02	0.58733	0.484175	1394	0.396586	0.752661	0.755831	0.263006	0.999329	55.3173	0.403776	44492.2	0.126379	0.121541	0.00338916	0.764434	0.208462	0.00156853	4.3551		11.0312	3.32381	49858.5	70136.5	0.4493	0.111197	0.524652	1.58868	0.998649	0.782835	0.34407	0.492391	0.51747	0.350365	0.173746			0.124558	0.289142
214	2019-07	2021-03	0.584378	0.531442	1426	0.399664	0.750263	0.713016	0.26575	0.999268	55.3715	0.404171	14597.9	0.147743	0.122188	0.00341868	0.783086	0.247732	0.00713376	4.20115		88.5911	4.757	52825.3	65844.1	1.11252	0.125708	0.424866	2.76665	0.999086	0.793726	0.34751	0.497376	0.51333	0.350365	0.165965			0.132297	0.289818
215	2019-07	2021-04	0.603648	0.529234	1369	0.381231	0.764493	0.712939	0.278196	0.999268	57.5587	0.420136		0.133925	0.13183	0.00359634	0.780028	0.210464	0.00979773	4.38271		88.8159	5.57783	75718.4	62067.6	1.83663	0.140465	0.407857	1.88045	1	0.660926	0.365038	0.500585	0.527255	0.343066	0.164683			0.127156	0.306863
216	2019-07	2021-05	0.576556	0.527462	1510	0.407777	0.743894	0.694807	0.270458	0.999268	59.279	0.432693	13774.7	0.150714	0.138829	0.00372146	0.770359	0.252914	0.0105738	4.07712		143.931	7.13874	99855.1	58149.4	2.30564	0.16557	0.372236	2.03711	0.997188	0.784099	0.352912	0.506777	0.520802	0.328467	0.165717			0.118089	0.314518
217	2019-07	2021-06	0.576657	0.543788	1527	0.407853	0.743835	0.587722	0.272114	0.999329	61.9597	0.45226		0.153128	0.14909	0.00400532	0.772812	0.288538	0.00794411	4.92719		110.245	4.86078	136201	46567.5	1.45488	0.155377	0.442887	1.61793	1	0.650125	0.349945	0.494862	0.526073	0.328467	0.163635			0.127152	0.357622
218	2019-07	2021-07	0.592131	0.550084	1472	0.392952	0.755482	0.735483	0.290488	0.999451	58.8218	0.429356	45450.7	0.132269	0.134836	0.003689	0.784724	0.23367	0.00836001	4.0559		100.541	5.06038	169541	27941.5	2.08269	0.122675	0.501227	1.2858	0.997669	0.643188	0.356898	0.506555	0.533338	0.321168	0.165235			0.123589	0.323501
219	2019-07	2021-08	0.596536	0.566953	1421	0.388357	0.75903	0.587867	0.300844	0.999451	59.203	0.432139		0.108031	0.134737	0.00377726	0.77648	0.225523	0.00432067	5.06839		78.2756	3.72066	156497	23833.8	1.58854	0.126879	0.312684	1.86807	1	0.753162	0.357274	0.476708	0.494723	0.343066	0.16747			0.126985	0.346402
220	2019-07	2021-09	0.627934	0.609602	1268	0.357687	0.782205	0.788153	0.314224	0.999512	57.2364	0.417784	17002.5	0.113761	0.125487	0.00361735	0.766457	0.208949	0.00150215	4.24459		34.4675	1.54613	106472	28884	0.442794	0.116683	0.322046	1.77335	0.999343	0.678682	0.361886	0.517362	0.546809	0.335766	0.172192			0.0995097	0.270914
221	2019-07	2021-10	0.606789	0.597651	1390	0.37854	0.766544	0.666481	0.306738	0.999512	60.0333	0.438199	37289.8	0.119254	0.138079	0.00394897	0.754628	0.231449	0.0008971	4.50464		12.1059	0.971916	147781	22813.4	0.491937	0.0965142	0.401065	2.83016	0.999358	0.607312	0.353832	0.49331	0.507997	0.350365	0.175205			0.11264	0.326585
222	2019-07	2021-11	0.613476	0.601841	1371	0.37215	0.771386	0.751223	0.313919	0.999512	56.542	0.412715	44599.6	0.115686	0.125001	0.00353312	0.76412	0.242252	0.00376049	3.70649		56.8315	3.19812	137256	27611.4	1.22247	0.102154	0.378075	3.74506	0.993825	0.744383	0.357836	0.485309	0.521415	0.350365	0.179182			0.117133	0.282457
223	2019-07	2021-12	0.620906	0.608582	1331	0.364857	0.776865	0.759033	0.314098	0.999512	58.4551	0.42668	24889.9	0.126026	0.133517	0.00367057	0.762447	0.211143	0.00197578	4.27609		9.94612	2.73303	149636	23382.1	0.865982	0.0924869	0.370651	3.91946	1	0.761012	0.352933	0.463588	0.470996	0.379562	0.182461			0.11827	0.300302
224	2019-08	2019-09	0.78206	0.8856	673	0.208682	0.883504	0.847149	0.57596	0.999939	47.8644	0.349375		0.11413	0.0878659	0.00290172	0.765137	0.154116	0.000351008	3.15016		11.494	0.83136	35031.6	4451.64	0.174756	0.124062	0.264015	1.45863	0.900181	0.670712	0.484382	0.605389	0.649129	0.291971	0.191625			0.0375781	0.21025
225	2019-08	2019-10	0.768474	0.85557	730	0.221884	0.875214	0.755733	0.534232	0.999756	55.5158	0.405225	4119.63	0.127825	0.118915	0.00343134	0.772067	0.132947	0.00450208	4.08671		66.4358	3.4271	30564.3	8735.29	0.975368	0.104431	0.339185	1.39182	0.994505	0.730997	0.473437	0.609675	0.650034	0.277372	0.185609			0.0552066	0.307815
226	2019-08	2019-11	0.708628	0.840752	949	0.279611	0.837472	0.727509	0.4628	0.999756	56.8946	0.415289	41272.7	0.110429	0.124468	0.0035673	0.777196	0.152512	0.0024598	4.32137		33.9868	2.33711	19727.9	8439.27	0.78611	0.112325	0.29394	1.71738	0.98751	0.743075	0.432527	0.557474	0.592826	0.306569	0.182854			0.0611503	0.306591
227	2019-08	2019-12	0.679629	0.808878	1071	0.307759	0.818136	0.75953	0.444972	0.999756	56.1872	0.410125		0.107161	0.121943	0.00348213	0.761495	0.154071	0.00723836	4.06801		88.9713	4.60042	48060.4	8475.04	1.44476	0.106488	0.313729	2.25088	0.999357	0.697921	0.412943	0.531978	0.563645	0.29927	0.183317			0.0762909	0.294977
228	2019-08	2020-01	0.672553	0.794489	1094	0.314549	0.813374	0.741268	0.422507	0.999756	56.9034	0.415353		0.120697	0.125241	0.00355894	0.780615	0.151186	0.00582075	4.08137		56.1008	3.89784	46219	10109.4	1.20361	0.0893286	0.314096	2.03492	1	0.735773	0.410326	0.531259	0.568125	0.313869	0.183684			0.0785102	0.286394
229	2019-08	2020-02	0.658205	0.780022	1158	0.328511	0.803462	0.692385	0.400865	0.999817	56.8683	0.415097	37500.8	0.135474	0.125789	0.00366039	0.764844	0.167775	0.00931714	4.50662		100.653	5.51119	53095.5	9054.88	1.81378	0.110357	0.325327	2.42289	1	0.721395	0.405406	0.547911	0.576682	0.291971	0.184698			0.0784756	0.322602
230	2019-08	2020-03	0.655369	0.737437	1149	0.331029	0.801657	0.705908	0.376864	0.999573	55.848	0.40765	40572.9	0.12595	0.120876	0.00342213	0.761468	0.19131	0.00576852	4.00492		55.9301	3.96177	14799.5	33764.1	1.05771	0.124205	0.274086	2.23866	1	0.759358	0.406199	0.541526	0.575504	0.313869	0.180241			0.076331	0.264975
231	2019-08	2020-04	0.549838	0.23227	1391	0.431051	0.725262	0.796173	0.230803	0.999329	53.3198	0.389196	25768.1	0.151753	0.119806	0.00320596	0.773284	0.314086	0.00532777	4.8302		44.2589	5.06661	237204	81564.3	1.81404	0.132086	1.21673	1.72327	1	0.817916	0.301722	0.450504	0.468572	0.386861	0.168903			0.108413	0.298162
232	2019-08	2020-05	0.59872	0.254385	1254	0.384427	0.762049	0.784324	0.253325	0.999207	52.3259	0.381941		0.135878	0.111305	0.00321873	0.772561	0.290448	0.00369226	4.66345		66.3918	4.06414	230564	79009.7	1.40148	0.137308	0.804427	1.81412	1	0.766435	0.333032	0.486561	0.499891	0.379562	0.174004			0.083228	0.277277
233	2019-08	2020-06	0.606246	0.346651	1286	0.377902	0.767029	0.812669	0.275265	0.999451	51.672	0.377168		0.124421	0.106613	0.00310056	0.7889	0.274019	0.000368029	3.97246		22.809	2.54113	183154	74555.7	0.366761	0.122735	0.495624	1.48877	0.999315	0.732773	0.340538	0.477726	0.505751	0.364964	0.169991			0.0999046	0.268205
234	2019-08	2020-07	0.626111	0.508424	1220	0.358824	0.781362	0.814111	0.294785	0.999512	55.6417	0.406144		0.123081	0.119507	0.00344496	0.764192	0.189017	0.00102941	4.16913		22.8093	2.61498	113216	55786.1	0.388331	0.124574	0.405734	1.14983	0.99864	0.679642	0.352002	0.474503	0.490724	0.357664	0.16293			0.104592	0.288708
235	2019-08	2020-08	0.624451	0.556408	1198	0.360084	0.780425	0.796594	0.298392	0.999573	53.0848	0.387481		0.119094	0.1094	0.00322803	0.734221	0.17286	0.00275439	4.01204		23.4748	2.09505	95330.9	45269.2	0.821784	0.112925	0.446677	1.31709	1	0.766202	0.353992	0.474384	0.498878	0.364964	0.161798			0.0977966	0.274974
236	2019-08	2020-09	0.599878	0.535455	1316	0.384121	0.762283	0.795471	0.291483	0.999512	51.7107	0.377451	30549.7	0.144151	0.105645	0.0031266	0.770664	0.125324	0.00234218	3.69518		43.8824	3.67715	107137	50922.9	1.0896	0.12937	0.503088	1.47026	0.999312	0.609375	0.350672	0.470866	0.497746	0.357664	0.165674			0.0999248	0.261207
237	2019-08	2020-10	0.594164	0.548912	1349	0.389772	0.75794	0.732895	0.287596	0.999451	54.8544	0.400397		0.123442	0.117079	0.00340253	0.790455	0.206198	0.00261898	4.3959		66.4204	3.76927	87207	53481.3	0.988254	0.152661	0.468666	1.7277	1	0.735554	0.341959	0.457727	0.47131	0.357664	0.166554			0.112656	0.300234
238	2019-08	2020-11	0.595158	0.498064	1321	0.388529	0.758898	0.796036	0.28782	0.999268	51.9711	0.379351	27992.9	0.142597	0.105627	0.0031446	0.785574	0.243749	0.00102965	3.93485		33.4241	2.48676	89491.1	65363.4	1.25972	0.0830946	0.556315	2.3068	1	0.713239	0.342067	0.474337	0.483442	0.364964	0.328572			0.105425	0.266643
239	2019-08	2020-12	0.585874	0.529694	1372	0.397681	0.751809	0.783166	0.27976	0.999268	53.7587	0.392399		0.141378	0.11398	0.00323328	0.756618	0.203979	0.00116991	4.20914		43.7258	1.84866	71607.8	61843.7	1.43991	0.140815	0.460313	2.95169	1	0.723768	0.328867	0.458986	0.469501	0.386861	0.174405			0.111991	0.27928
240	2019-08	2021-01	0.606991	0.492796	1293	0.377298	0.767488	0.7617	0.272323	0.999451	55.8301	0.407519		0.140384	0.122681	0.00366037	0.774933	0.182938	0.000873571	4.51437		43.8958	2.54041	90759.4	64653.6	1.07423	0.125424	0.559493	1.98813	0.999314	0.766591	0.340321	0.477713	0.496729	0.372263	0.174577			0.100077	0.297972
241	2019-08	2021-02	0.594876	0.453208	1360	0.389239	0.758351	0.743361	0.264113	0.999329	56.7803	0.414455	33138.6	0.143605	0.128299	0.00345613	0.786836	0.207156	0.00236291	4.60245		11.2196	3.47296	106184	69973.7	0.453216	0.106335	0.526576	1.65203	0.998649	0.798004	0.345538	0.498909	0.523685	0.343066	0.172043			0.106398	0.316389
242	2019-08	2021-03	0.58528	0.572847	1420	0.398764	0.750965	0.657394	0.263502	0.999268	57.931	0.422854	19252.7	0.152267	0.133052	0.00363641	0.779051	0.232916	0.00850555	4.58298		88.777	4.99771	22878.6	65678.2	1.11356	0.127485	0.450315	2.23405	0.999336	0.725501	0.34033	0.481993	0.497044	0.357664	0.164139			0.118844	0.315788
243	2019-08	2021-04	0.60226	0.587715	1373	0.382558	0.76348	0.716467	0.272353	0.999268	57.7321	0.421402		0.148323	0.133197	0.00355521	0.753385	0.203464	0.0113113	4.24565		89.0029	5.92045	21941.1	61950.4	1.83454	0.13061	0.436038	1.79939	0.999351	0.678801	0.355939	0.483304	0.51157	0.343066	0.163151			0.112981	0.279716
244	2019-08	2021-05	0.579184	0.583207	1496	0.4052	0.745924	0.694756	0.265957	0.999268	58.1034	0.424112	33524.2	0.164069	0.134372	0.0036163	0.792216	0.285823	0.0119893	3.94875		144.117	7.44925	40890.2	58037.8	2.30372	0.153683	0.395784	1.7395	0.998076	0.808121	0.348986	0.486818	0.504796	0.335766	0.164448			0.107293	0.300645
245	2019-08	2021-06	0.575749	0.595395	1529	0.408714	0.743155	0.65623	0.272211	0.999329	59.3043	0.432878		0.168301	0.137098	0.0037641	0.763851	0.276152	0.00921054	4.46887		110.429	5.23093	75685.4	46443.7	1.45399	0.155111	0.455453	1.67503	1	0.640325	0.343596	0.478188	0.510076	0.335766	0.162405			0.113016	0.321319
246	2019-08	2021-07	0.592562	0.598662	1468	0.392513	0.755822	0.739035	0.288776	0.999451	59.8164	0.436616		0.137436	0.139354	0.00377001	0.771225	0.241032	0.00964566	4.43885		100.73	5.21562	108858	28262.4	2.08058	0.108119	0.531271	1.48589	0.9975	0.736632	0.352569	0.488774	0.517285	0.328467	0.16357			0.108163	0.334603
247	2019-08	2021-08	0.602912	0.619542	1391	0.382143	0.763797	0.652286	0.300661	0.999451	59.9416	0.43753	42464.3	0.117064	0.138381	0.00376136	0.749094	0.205753	0.00524402	4.68756		78.4656	3.96602	95629.2	24282.2	1.58886	0.122226	0.326694	1.49401	1	0.699235	0.356266	0.460451	0.479111	0.350365	0.164833			0.111484	0.323626
248	2019-08	2021-09	0.626064	0.666784	1274	0.359481	0.780874	0.751829	0.310597	0.999512	57.4108	0.419057		0.130557	0.126268	0.00360243	0.773633	0.192045	0.00209367	4.32524		34.6691	1.94544	46834.7	29008.9	0.442172	0.102087	0.338677	1.49798	0.998437	0.787565	0.352792	0.499846	0.529696	0.350365	0.169038			0.0865134	0.286285
249	2019-08	2021-10	0.607254	0.652552	1386	0.378069	0.766902	0.714369	0.304372	0.999512	57.5674	0.4202		0.129978	0.127383	0.00371688	0.756744	0.235712	0.00144405	4.43868		12.3227	1.36915	87004.2	22782.9	0.486467	0.0868301	0.419735	2.15026	1	0.709174	0.342554	0.486369	0.498545	0.357664	0.175696			0.0958098	0.32616
250	2019-08	2021-11	0.608953	0.658463	1389	0.376525	0.768075	0.744675	0.303812	0.999512	56.2228	0.410385	30138.9	0.119516	0.123118	0.00349496	0.779977	0.25925	0.00459102	4.15318		57.0284	3.40597	76645.6	27420.1	1.21848	0.104724	0.387088	3.18027	0.99198	0.73386	0.3503	0.474545	0.510278	0.350365	0.176208			0.104667	0.295663
251	2019-08	2021-12	0.61403	0.663086	1359	0.371514	0.771865	0.767905	0.311191	0.999512	58.0775	0.423924		0.108509	0.131132	0.00361557	0.787044	0.233296	0.00228163	4.20167		9.82078	2.56126	88717.8	23217.1	0.890646	0.0803264	0.376132	3.25481	1	0.660226	0.347015	0.463749	0.471267	0.379562	0.178799			0.105991	0.29593
252	2019-09	2019-10	0.787362	0.853767	673	0.203816	0.886528	0.736487	0.580773	0.999817	58.1979	0.424802	19452.3	0.111626	0.129443	0.00365233	0.770012	0.14112	0.002857	4.40096		54.981	3.13414	65066.6	9766.46	1.00531	0.114318	0.276513	1.26592	0.999361	0.714267	0.490517	0.623631	0.665219	0.277372	0.185657			0.0492489	0.332285
253	2019-09	2019-11	0.735095	0.828578	862	0.254202	0.854392	0.735812	0.492132	0.999817	57.6194	0.42058		0.111859	0.12647	0.00358044	0.768229	0.138027	0.00122536	4.20741		22.5118	1.90044	54500.7	6968.74	0.80662	0.12917	0.245733	1.19301	0.983431	0.561677	0.459256	0.584545	0.619264	0.29927	0.18449			0.0534455	0.319436
254	2019-09	2019-12	0.701823	0.789757	998	0.286452	0.832831	0.746756	0.471325	0.999817	56.2317	0.41045	34719.5	0.125937	0.121683	0.00347934	0.785081	0.134173	0.00525257	3.72573		77.5081	4.31992	82976.1	6987.01	1.46685	0.131049	0.285642	1.76885	0.998097	0.707212	0.427561	0.540938	0.586852	0.284672	0.184622			0.0707124	0.285259
255	2019-09	2020-01	0.698322	0.775032	1007	0.289784	0.830557	0.748707	0.458096	0.999817	56.8243	0.414776		0.129692	0.124533	0.00354139	0.759666	0.201672	0.00408049	3.92637		44.6293	3.60748	81162.7	8395.73	1.23096	0.124341	0.344174	1.61964	1	0.666349	0.429603	0.544463	0.592835	0.29927	0.184047			0.075321	0.292428
256	2019-09	2020-02	0.674207	0.762365	1109	0.313188	0.814331	0.710601	0.422456	0.999878	57.2975	0.41823		0.144593	0.127535	0.00365081	0.76812	0.186431	0.00703239	4.37322		89.183	5.21294	88055.7	7390.07	1.83755	0.109483	0.339688	2.17605	1	0.646762	0.418698	0.562297	0.600524	0.277372	0.185163			0.0764604	0.322478
257	2019-09	2020-03	0.653381	0.715178	1174	0.333144	0.800136	0.732366	0.386668	0.999634	54.9909	0.401393	37690.9	0.135088	0.117029	0.00339466	0.738817	0.185147	0.0040102	3.82632		44.4619	3.73849	46409	31219.1	1.08514	0.115214	0.311623	1.7678	0.999355	0.780327	0.401231	0.520483	0.563466	0.313869	0.181543			0.0929128	0.26759
258	2019-09	2020-04	0.550462	0.245697	1412	0.43075	0.725505	0.761567	0.236423	0.99939	53.7587	0.392399		0.168554	0.125423	0.00322189	0.757855	0.296542	0.00704943	4.8665		55.7274	5.45859	203024	79184.1	1.80894	0.145797	1.3396	2.44757	0.999263	0.75556	0.309579	0.446401	0.473906	0.372263	0.168843			0.111636	0.295098
259	2019-09	2020-05	0.596541	0.268973	1283	0.386795	0.760232	0.773702	0.255677	0.999268	52.259	0.381452	19876.6	0.1577	0.114552	0.00323251	0.761589	0.270153	0.00536953	4.51704		77.858	4.61855	196424	76636.9	1.39591	0.132267	0.921824	1.93784	1	0.68438	0.335331	0.465264	0.489258	0.372263	0.174982			0.093512	0.278165
260	2019-09	2020-06	0.620134	0.367289	1249	0.364672	0.777004	0.815138	0.290195	0.999512	53.2823	0.388922		0.158867	0.115522	0.00326411	0.773834	0.258066	0.000407909	4.19479		11.3354	2.50096	149240	72133.3	0.408986	0.142875	0.592166	2.10239	1	0.641519	0.355817	0.474345	0.50544	0.357664	0.16986			0.105521	0.288889
261	2019-09	2020-07	0.639379	0.540616	1185	0.346188	0.790673	0.776257	0.315358	0.999573	53.5817	0.391107		0.124279	0.112407	0.00328745	0.791818	0.175518	0.000436135	4.04787		11.3417	2.57485	80093.7	53398.5	0.418233	0.13601	0.488965	1.4705	1	0.662269	0.36978	0.475554	0.489796	0.357664	0.305739			0.107244	0.277259
262	2019-09	2020-08	0.644687	0.592163	1137	0.340725	0.794654	0.823373	0.31847	0.999634	48.775	0.356022	36451.2	0.132832	0.0949561	0.00287497	0.735371	0.17431	0.00378092	3.37956		34.9667	2.71418	62616.8	42780.8	0.744937	0.131667	0.534871	2.0905	0.997924	0.702752	0.37004	0.473906	0.497893	0.364964	0.315356			0.104207	0.238716
263	2019-09	2020-09	0.621548	0.569205	1247	0.363345	0.777995	0.805944	0.309042	0.999573	49.8899	0.36416		0.137729	0.0988896	0.00296719	0.778287	0.132283	0.00146722	3.55005		32.4486	3.4948	74032.8	48398	1.11856	0.14014	0.603141	1.25975	1	0.626535	0.371355	0.468993	0.496924	0.357664	0.349237			0.107891	0.254986
264	2019-09	2020-10	0.608371	0.581461	1310	0.376221	0.768306	0.699741	0.297693	0.999512	56.4801	0.412263	31214.6	0.140134	0.12381	0.00355318	0.740808	0.179655	0.00169309	4.79869		54.9645	3.4796	55017.5	51111	1.01719	0.146595	0.570503	1.87352	1	0.634877	0.354375	0.461352	0.481817	0.350365	0.166632			0.1081	0.315566
265	2019-09	2020-11	0.613061	0.528297	1268	0.371412	0.771942	0.779976	0.303027	0.999329	51.7494	0.377733		0.13623	0.106059	0.00317972	0.75953	0.215727	0.00183751	4.0642		44.9002	2.90883	57642.9	62994.9	1.22024	0.141603	0.665131	2.21592	1	0.61747	0.347443	0.478492	0.492562	0.364964	0.170454			0.0992373	0.275749
266	2019-09	2020-12	0.608381	0.559544	1299	0.376086	0.768408	0.784062	0.297348	0.999329	53.5257	0.390699	33105.7	0.138926	0.114519	0.00323748	0.732087	0.177995	0.0021194	4.09729		55.182	2.38326	40217.5	59532.8	1.42819	0.141862	0.561635	2.72656	1	0.685229	0.34497	0.469433	0.484723	0.379562	0.174751			0.110964	0.269375
267	2019-09	2021-01	0.623714	0.520925	1244	0.361313	0.779511	0.761159	0.288364	0.999512	53.9073	0.393484	42745.8	0.145003	0.116833	0.00347573	0.771643	0.142796	0.00158125	4.16384		55.3567	2.88973	58195.5	62326.8	1.03524	0.1489	0.636039	1.95834	1	0.639683	0.350679	0.489394	0.513679	0.357664	0.176173			0.0975698	0.28047
268	2019-09	2021-02	0.61037	0.481597	1315	0.374431	0.769662	0.788655	0.277692	0.99939	54.909	0.400796	45559.2	0.140326	0.121774	0.00334375	0.761374	0.191799	0.00140807	4.20338		0.649073	3.29782	72978.9	67606.6	0.479448	0.124298	0.606061	1.63664	1	0.691088	0.352989	0.502477	0.529184	0.343066	0.172568			0.101046	0.301179
269	2019-09	2021-03	0.608467	0.571444	1341	0.376474	0.768113	0.646258	0.277113	0.999329	57.0526	0.416442	26543.6	0.146503	0.128962	0.0035336	0.742422	0.201169	0.00640656	4.44841		77.3169	4.80298	30005.6	63262	1.13877	0.168586	0.510463	1.54011	1	0.691163	0.359241	0.498063	0.525388	0.335766	0.164605			0.110647	0.299134
270	2019-09	2021-04	0.619625	0.568897	1318	0.365908	0.776079	0.712113	0.286238	0.999329	57.7927	0.421845		0.16094	0.133311	0.00358262	0.778715	0.192416	0.00890109	4.2089		77.5396	5.6398	50694	59476.7	1.86009	0.162702	0.460798	1.51796	0.99936	0.622797	0.369796	0.50299	0.539074	0.335766	0.163434			0.104899	0.297985
271	2019-09	2021-05	0.597027	0.562607	1437	0.388064	0.759256	0.721111	0.283624	0.999329	57.0351	0.416314	42087.2	0.161443	0.129427	0.00350822	0.737224	0.250607	0.00974979	3.80961		132.656	7.17499	74139.2	55571.8	2.32665	0.165101	0.40719	1.43858	0.998734	0.681648	0.360662	0.490777	0.516036	0.335766	0.165334			0.101792	0.291171
272	2019-09	2021-06	0.596895	0.576418	1454	0.388355	0.759032	0.655492	0.290525	0.99939	59.5819	0.434904		0.163095	0.13787	0.00380994	0.789956	0.256135	0.0070193	4.63717		98.9759	4.98017	110218	44187.3	1.48036	0.192066	0.39757	1.68132	0.999373	0.691536	0.359438	0.495839	0.537799	0.335766	0.163425			0.104363	0.3376
273	2019-09	2021-07	0.612805	0.580943	1397	0.373031	0.77072	0.74393	0.306477	0.999512	59.7578	0.436189		0.134755	0.138357	0.00376251	0.759307	0.226352	0.00747621	4.37374		89.2613	4.80043	143543	26217.3	2.10736	0.139357	0.45912	1.44983	0.998767	0.647899	0.373107	0.507014	0.534729	0.335766	0.164418			0.0979169	0.325263
274	2019-09	2021-08	0.619562	0.60524	1338	0.366174	0.775879	0.667762	0.315327	0.999512	58.7537	0.428859		0.118333	0.132726	0.00374754	0.739486	0.196017	0.00372244	4.64018		66.9949	3.67979	130427	22147.7	1.61888	0.158479	0.272013	1.31103	1	0.654576	0.365536	0.478665	0.500204	0.357664	0.165577			0.10833	0.333238
275	2019-09	2021-09	0.650808	0.652955	1189	0.335686	0.798304	0.757789	0.329433	0.999573	57.7321	0.421402		0.103367	0.127299	0.00365194	0.761941	0.202208	0.00100176	4.32181		23.1815	1.60958	80664.4	26692.2	0.485279	0.140513	0.316402	1.29075	1	0.646272	0.374844	0.499601	0.530535	0.343066	0.169996			0.0848389	0.284121
276	2019-09	2021-10	0.620563	0.639773	1347	0.365338	0.776506	0.655467	0.321597	0.999573	60.1249	0.438868		0.119613	0.138977	0.00391353	0.754962	0.232136	0.000693591	4.72435		1.17396	1.13626	121744	20706.4	0.530304	0.123205	0.338194	1.90092	0.999367	0.70654	0.354374	0.465289	0.487015	0.364964	0.176511			0.0981602	0.335356
277	2019-09	2021-11	0.616286	0.639872	1376	0.369594	0.773311	0.740722	0.320535	0.999573	57.4108	0.419057	35683.6	0.125261	0.127835	0.00361344	0.732763	0.229897	0.00312356	4.00977		45.5453	3.18623	111276	25169.1	1.24949	0.16183	0.330732	2.62421	0.999379	0.613667	0.353924	0.474415	0.511476	0.343066	0.176796			0.105346	0.296552
278	2019-09	2021-12	0.625494	0.646755	1328	0.360576	0.78006	0.709651	0.324727	0.999573	59.2453	0.432447	17562.3	0.114625	0.136425	0.00372131	0.759981	0.209851	0.00186664	4.40378		21.1054	2.68543	123600	21063.8	0.82887	0.128244	0.308684	2.99987	1	0.703	0.352156	0.457185	0.476597	0.386861	0.17926			0.10599	0.30614
279	2019-10	2019-11	0.771685	0.891601	737	0.219019	0.877023	0.711672	0.554233	0.999878	55.7584	0.406996	10216.8	0.109124	0.118658	0.00342215	0.803508	0.111864	0.000798011	4.19944		32.4841	2.19778	11617.6	14798.2	0.336011	0.126655	0.236123	1.29996	0.918121	0.725438	0.504183	0.612866	0.645338	0.270073	0.182188			0.0475054	0.300741
280	2019-10	2019-12	0.730354	0.867177	899	0.259003	0.851233	0.772796	0.51577	1	52.9434	0.386448		0.109013	0.108489	0.00325408	0.757301	0.128474	0.000831821	3.80882		22.5419	2.21159	19287	14693.5	0.584897	0.0948552	0.271732	2.06634	0.998748	0.769209	0.456749	0.566236	0.60081	0.277372	0.183108			0.0700869	0.274544
281	2019-10	2020-01	0.720192	0.845996	934	0.268777	0.844747	0.759243	0.493897	1	54.6809	0.399131	38087.8	0.122507	0.115731	0.0033876	0.78674	0.176986	0.00117572	4.15333		10.408	2.79389	18099.6	15829.5	0.327636	0.0965498	0.294229	1.9029	1	0.747129	0.457444	0.563691	0.60099	0.284672	0.332707			0.0798202	0.277767
282	2019-10	2020-02	0.708198	0.834904	986	0.280432	0.836917	0.707033	0.46121	0.999939	57.7581	0.421592		0.133142	0.128875	0.00367053	0.779511	0.152801	0.00133011	4.47766		34.2386	3.10684	24034.4	14818.3	1.06682	0.116993	0.278603	2.49142	0.999373	0.687739	0.460952	0.583525	0.625959	0.248175	0.182207			0.0757199	0.30293
283	2019-10	2020-03	0.671479	0.725285	1115	0.315775	0.812511	0.750317	0.416058	0.999817	54.909	0.400796		0.140061	0.116771	0.00340032	0.796059	0.169388	0.000871435	4.27669		10.5503	2.68215	25844.4	40347.7	0.333941	0.109961	0.310038	2.10248	0.99682	0.606287	0.440824	0.557073	0.589057	0.291971	0.179968			0.082041	0.264113
284	2019-10	2020-04	0.55245	0.217695	1425	0.429088	0.726855	0.711534	0.238777	0.999329	54.5985	0.398529	28555.8	0.200763	0.130718	0.00334148	0.78779	0.293353	0.0150454	4.86361		110.695	7.19526	267566	88570.4	2.46213	0.1504	1.3719	2.42229	1	0.82833	0.316395	0.452879	0.472103	0.364964	0.16709			0.109003	0.313055
285	2019-10	2020-05	0.603862	0.238858	1272	0.379928	0.765487	0.706568	0.26335	0.999451	54.754	0.399664		0.178439	0.126176	0.00347687	0.771704	0.301281	0.012915	4.87603		132.828	6.91813	260927	86023.4	2.09485	0.113158	0.95114	2.25056	0.997906	0.826133	0.343162	0.493856	0.523777	0.350365	0.172671			0.0908739	0.318294
286	2019-10	2020-06	0.617251	0.326357	1278	0.367664	0.774762	0.744085	0.294817	0.999695	53.8888	0.393349		0.152886	0.118624	0.00332376	0.794357	0.262953	0.00375526	4.3109		43.6529	4.16128	213515	81499.9	0.92084	0.143415	0.604527	2.01105	0.999334	0.719658	0.357555	0.486131	0.519227	0.343066	0.168095			0.105162	0.289182
287	2019-10	2020-07	0.641612	0.485044	1192	0.34421	0.792117	0.728436	0.31664	0.999512	58.3781	0.426117	34870.4	0.125953	0.133247	0.00366366	0.775246	0.143887	0.00214373	4.5639		43.6501	3.92432	143515	62834.8	0.916881	0.11451	0.535134	1.45806	0.989292	0.696687	0.371503	0.485462	0.498239	0.343066	0.161423			0.113415	0.321657
288	2019-10	2020-08	0.637312	0.531449	1182	0.348057	0.789305	0.769135	0.326721	0.999695	54.4243	0.397257	42903.1	0.157516	0.117642	0.0034137	0.774636	0.18757	0.0103356	4.3998		89.8523	4.83467	125569	52172.5	1.5467	0.123955	0.564825	1.72358	0.999318	0.782396	0.37653	0.489834	0.512323	0.343066	0.161443			0.10529	0.326906
289	2019-10	2020-09	0.618649	0.510494	1276	0.366351	0.775747	0.724735	0.320493	0.999634	55.263	0.40338		0.142768	0.119623	0.00342571	0.768758	0.112971	0.00183422	4.36705		22.5654	4.1271	137398	57823.5	0.392805	0.127458	0.634423	1.18215	0.999331	0.644711	0.375243	0.481317	0.50547	0.343066	0.163801			0.10408	0.312285
290	2019-10	2020-10	0.613791	0.522883	1305	0.37116	0.772132	0.758398	0.317093	0.999573	55.848	0.40765		0.11196	0.120488	0.00346026	0.773141	0.169939	0.00133482	4.18209		0.143658	3.66459	117346	60500.6	0.301638	0.155089	0.552651	1.2598	0.999336	0.672982	0.35897	0.479654	0.490098	0.335766	0.165528			0.107172	0.314445
291	2019-10	2020-11	0.620012	0.472968	1257	0.364877	0.776851	0.720217	0.319883	0.999512	54.8179	0.400131	39446.1	0.165871	0.11991	0.00342469	0.79359	0.221306	0.00730187	4.37862		99.8586	5.28969	119631	72356.2	1.96959	0.119705	0.648954	2.31904	0.997976	0.769455	0.362227	0.492404	0.49668	0.350365	0.169181			0.0991451	0.310385
292	2019-10	2020-12	0.626466	0.503237	1242	0.358752	0.781415	0.779505	0.315839	0.999512	49.6387	0.362326	40559.5	0.185202	0.103232	0.00299272	0.76261	0.193399	0.00781295	3.76914		110.157	4.81058	101760	68927.1	2.13632	0.144149	0.581952	3.06275	1	0.758483	0.365131	0.48129	0.489037	0.372263	0.174332			0.106965	0.266166
293	2019-10	2021-01	0.635407	0.46977	1213	0.350173	0.787752	0.761451	0.302592	0.999695	52.1824	0.380893	16885.1	0.164784	0.112076	0.00337002	0.75569	0.158608	0.00619028	4.08134		110.33	5.13883	120969	71765.9	1.79786	0.143443	0.608725	2.22843	0.998665	0.739497	0.366987	0.50108	0.511869	0.350365	0.174455			0.0956171	0.264343
294	2019-10	2021-02	0.622864	0.431084	1280	0.362504	0.778623	0.797016	0.294953	0.999573	53.6656	0.39172		0.1513	0.117226	0.00327918	0.738226	0.192436	0.00177407	4.02297		55.22	3.63319	136443	77042.8	0.773521	0.116322	0.594261	1.64361	1	0.776641	0.368801	0.528363	0.553896	0.321168	0.171688			0.0928319	0.277826
295	2019-10	2021-03	0.617502	0.545481	1320	0.367893	0.77459	0.729815	0.290422	0.999512	56.9034	0.415353	9946.65	0.132709	0.127562	0.00352327	0.778272	0.189015	0.00134941	4.2933		22.3429	3.29236	48589.3	72700.2	0.288971	0.137186	0.504856	1.84756	1	0.75665	0.377323	0.526356	0.546146	0.328467	0.163638			0.101862	0.297794
296	2019-10	2021-04	0.629407	0.579768	1293	0.356591	0.783017	0.68997	0.301791	0.999512	58.0086	0.423421	37825.7	0.131048	0.132869	0.00360156	0.777618	0.158322	0.00227168	4.6385		22.5742	3.57017	28804.8	68894.9	1.13341	0.148087	0.413275	1.35279	0.999368	0.763226	0.388179	0.531788	0.568811	0.313869	0.162059			0.0992622	0.308794
297	2019-10	2021-05	0.606685	0.604229	1412	0.378857	0.766303	0.68149	0.296741	0.999512	58.3438	0.425867		0.135408	0.133206	0.0036805	0.759405	0.246866	0.0034322	4.41209		77.6811	5.3603	22496	64999.2	1.64718	0.151253	0.432	1.45332	1	0.669756	0.379239	0.528417	0.561582	0.306569	0.163409			0.0989234	0.287322
298	2019-10	2021-06	0.603794	0.619519	1441	0.381823	0.764041	0.644676	0.299788	0.999573	60.0083	0.438017	42698.9	0.149058	0.138397	0.00387824	0.770229	0.231801	0.00150517	4.84993		43.9951	2.81681	48395.1	53585.9	0.674637	0.156807	0.412053	1.38248	1	0.723749	0.376844	0.513994	0.557216	0.306569	0.16195			0.104267	0.349976
299	2019-10	2021-07	0.606763	0.62831	1442	0.379075	0.766137	0.750831	0.302802	0.999695	58.1034	0.424112	35347.8	0.106408	0.129424	0.00360294	0.755116	0.220981	0.00171428	4.10391		34.3161	3.00122	80264.5	35549	1.39691	0.104905	0.45624	1.19197	0.995131	0.870676	0.373496	0.518863	0.552823	0.313869	0.162131			0.104917	0.307697
300	2019-10	2021-08	0.616419	0.64753	1369	0.369401	0.773457	0.676277	0.31873	0.999695	61.7333	0.450608		0.103128	0.145488	0.0039232	0.741118	0.184375	0.000415155	4.51617		12.0968	1.76056	66956.9	31376.8	0.800059	0.134363	0.295045	1.37065	1	0.721546	0.376064	0.490868	0.513735	0.328467	0.163662			0.105846	0.340465
301	2019-10	2021-09	0.646141	0.695252	1224	0.340378	0.794906	0.747529	0.337571	0.999756	56.0179	0.408889		0.0963525	0.119948	0.00352849	0.737076	0.167736	0.000877838	4.00907		31.8929	2.24247	25015.3	36011	0.730477	0.130584	0.245595	1.49131	1	0.739277	0.375271	0.506357	0.532309	0.335766	0.169184			0.0939687	0.289429
302	2019-10	2021-10	0.633305	0.682617	1308	0.353132	0.785574	0.65811	0.339932	0.999756	59.8164	0.436616	10748.8	0.120371	0.138144	0.00382326	0.793475	0.215562	0.00190017	4.14756		54.2334	2.78874	58814.5	29689.9	0.719408	0.120581	0.269215	2.32661	1	0.718507	0.370992	0.485928	0.495988	0.350365	0.172034			0.0966614	0.318414
303	2019-10	2021-11	0.636642	0.684595	1303	0.349987	0.787889	0.715522	0.332607	0.999634	59.3886	0.433493		0.129027	0.136377	0.00374707	0.779375	0.214438	0.000896728	4.07597		9.74578	1.60649	49154.8	34200.4	0.36399	0.133857	0.274376	3.09426	1	0.740023	0.376507	0.495911	0.525093	0.328467	0.174683			0.107151	0.287822
304	2019-10	2021-12	0.639146	0.694224	1285	0.347485	0.789723	0.745674	0.339934	0.999756	55.3805	0.404237		0.133579	0.121416	0.00337177	0.740272	0.22288	0.00355941	3.80857		76.0656	3.43267	59992.1	29816	1.62245	0.132689	0.321664	3.28174	1	0.733018	0.365479	0.478555	0.490819	0.364964	0.179011			0.106464	0.2694
305	2019-11	2019-12	0.762473	0.906209	776	0.227967	0.871353	0.796988	0.567532	0.999878	53.1225	0.387755		0.107462	0.108987	0.00325552	0.765205	0.108065	0.00198311	3.5669		55.0015	3.5434	28640.3	1775.66	0.819939	0.126184	0.292322	1.55814	1	0.694256	0.477656	0.567789	0.584609	0.284672	0.181848			0.0493092	0.269468
306	2019-11	2020-01	0.746724	0.884793	831	0.243125	0.861615	0.85037	0.533447	0.999878	50.1099	0.365766	37535.5	0.129133	0.0977142	0.00305491	0.774647	0.198646	0.00129611	3.71982		22.1202	3.09981	26954.7	2548.84	0.548853	0.125601	0.315456	1.38464	1	0.523466	0.474526	0.576469	0.601991	0.291971	0.182747			0.0575629	0.27275
307	2019-11	2020-02	0.723302	0.862774	925	0.265805	0.846727	0.810961	0.491357	0.999939	52.9056	0.386172	12876.6	0.122495	0.109236	0.00332817	0.729163	0.147989	0.00320528	3.75528		66.6735	4.47176	33736.5	4619.55	1.26505	0.0935021	0.290957	1.87605	1	0.674515	0.467137	0.578776	0.602883	0.277372	0.344149			0.0583612	0.260393
308	2019-11	2020-03	0.685621	0.78335	1056	0.302059	0.822102	0.737845	0.440154	0.999817	56.7979	0.414583	44637.9	0.119125	0.124345	0.00354646	0.740261	0.124474	0.00117416	3.83242		21.9547	3.22453	15133.6	26654.8	0.358422	0.125967	0.327652	1.46214	0.999362	0.764453	0.439115	0.536293	0.565968	0.313869	0.178947			0.0763698	0.279266
309	2019-11	2020-04	0.553875	0.235631	1416	0.427665	0.728006	0.737714	0.244693	0.999451	52.4595	0.382916		0.198081	0.12366	0.00320858	0.750975	0.285323	0.0118089	4.62321		78.2362	6.4899	256586	74746.6	2.32298	0.117174	1.3428	2.7681	0.999271	0.797206	0.313386	0.45424	0.466503	0.372263	0.166136			0.0998388	0.281532
310	2019-11	2020-05	0.607444	0.258175	1255	0.376425	0.768151	0.747319	0.27071	0.999451	53.8238	0.392874		0.177424	0.123009	0.00337636	0.745079	0.278986	0.010001	4.54091		100.367	6.20214	249937	72182.3	1.93261	0.135821	0.925569	2.16388	1	0.696886	0.339428	0.478236	0.501506	0.364964	0.171322			0.0820158	0.29354
311	2019-11	2020-06	0.620752	0.351318	1261	0.36424	0.777327	0.774628	0.307192	0.999695	57.0877	0.416698	44380.6	0.163679	0.13256	0.00357258	0.76985	0.221518	0.00204592	4.42313		11.1798	3.53178	202478	67682.4	0.728843	0.08478	0.613595	2.31525	0.999332	0.740201	0.355188	0.480685	0.507538	0.343066	0.166398			0.103817	0.292963
312	2019-11	2020-07	0.632415	0.517378	1227	0.353094	0.785602	0.726907	0.315671	0.999634	59.4054	0.433616		0.141565	0.138078	0.00374645	0.802463	0.141439	0.000810049	4.79857		11.18	3.50615	132365	49218.7	0.721733	0.105685	0.53668	1.61728	0.997104	0.739046	0.363096	0.455257	0.461623	0.364964	0.161182			0.119013	0.34759
313	2019-11	2020-08	0.632434	0.555594	1199	0.352751	0.785855	0.731731	0.323773	0.999817	57.4543	0.419375	30455.1	0.152274	0.130471	0.0036045	0.768143	0.166505	0.00742207	4.40305		57.4441	3.99156	114378	38700.8	1.32491	0.13112	0.570953	2.25281	0.999316	0.715968	0.370986	0.475221	0.499494	0.357664	0.160029			0.11233	0.34049
314	2019-11	2020-09	0.61247	0.543492	1299	0.372313	0.771263	0.735364	0.323139	0.999756	56.2939	0.410904		0.149519	0.124394	0.00347702	0.767197	0.134315	0.00118285	4.12405		10.0496	3.98659	126243	44369.9	0.412434	0.124015	0.636155	1.23185	1	0.728037	0.3664	0.453642	0.468936	0.364964	0.163033			0.115598	0.304891
315	2019-11	2020-10	0.600588	0.56056	1358	0.383941	0.762421	0.76766	0.317564	0.999695	51.9038	0.37886		0.138598	0.105809	0.00316597	0.789812	0.15159	0.00115661	4.01333		32.4676	3.92331	106193	46711.8	0.275999	0.109383	0.555838	1.93165	0.998425	0.731833	0.350818	0.449312	0.450062	0.364964	0.373795			0.11573	0.263966
316	2019-11	2020-11	0.619624	0.51216	1256	0.365222	0.776592	0.725703	0.325037	0.999512	56.6569	0.413554		0.166304	0.12714	0.00351927	0.786554	0.214354	0.00484832	4.42274		67.4069	4.47436	108429	58480.8	1.79564	0.128879	0.652577	1.90742	1	0.712862	0.367205	0.475193	0.474843	0.372263	0.167111			0.0986321	0.301842
317	2019-11	2020-12	0.630514	0.544591	1223	0.354801	0.784341	0.743959	0.330197	0.999512	56.2228	0.410385		0.173718	0.127208	0.00343495	0.77885	0.17438	0.00542394	4.44796		77.6892	3.97036	90591.9	55055.3	1.97584	0.127349	0.583016	2.54601	1	0.705386	0.367686	0.489759	0.49908	0.372263	0.171607			0.0985938	0.305297
318	2019-11	2021-01	0.637515	0.507297	1202	0.348103	0.789271	0.781521	0.314664	0.999695	53.6843	0.391856		0.173035	0.117957	0.00339925	0.795233	0.162846	0.00404359	3.99543		77.8646	4.54851	109854	57944.3	1.60319	0.128354	0.623653	2.09008	0.999331	0.581163	0.362046	0.495271	0.505532	0.357664	0.172739			0.0878938	0.275037
319	2019-11	2021-02	0.621056	0.465382	1285	0.364229	0.777335	0.790769	0.297938	0.999573	52.3927	0.382429	18738.1	0.167318	0.113215	0.00320299	0.746993	0.176027	0.000646269	4.05332		22.7686	3.05056	125386	63247.1	0.555721	0.0967966	0.591962	1.83005	0.998439	0.692566	0.364562	0.502402	0.525523	0.335766	0.342713			0.0928114	0.285009
320	2019-11	2021-03	0.624198	0.587941	1289	0.361368	0.77947	0.703682	0.303286	0.999512	54.1202	0.395038		0.148832	0.117101	0.00325596	0.749812	0.17278	0.0025537	4.22918		54.8122	4.32767	37532.1	58938.9	0.461442	0.136815	0.521613	1.39382	1	0.669524	0.37321	0.509137	0.527796	0.350365	0.163074			0.100591	0.282916
321	2019-11	2021-04	0.629991	0.62314	1288	0.355998	0.783457	0.695395	0.311556	0.999512	58.0861	0.423986	38067.2	0.148218	0.134176	0.00359676	0.772013	0.154616	0.00466984	4.16388		55.0326	4.88486	19668.1	55196.8	1.32584	0.131964	0.460617	1.43437	1	0.665096	0.381597	0.519421	0.551746	0.328467	0.161076			0.0975353	0.289514
322	2019-11	2021-05	0.603621	0.630365	1423	0.381808	0.764052	0.677241	0.296842	0.999512	59.7244	0.435944		0.151096	0.140497	0.00378361	0.761646	0.232329	0.00569083	4.4626		110.149	6.56525	24558.5	51311.2	1.8238	0.146269	0.428415	1.5221	0.99475	0.684352	0.370848	0.501682	0.528163	0.328467	0.162751			0.0997003	0.300066
323	2019-11	2021-06	0.598572	0.634522	1462	0.386875	0.760171	0.634934	0.305336	0.999573	58.5833	0.427615	16349.9	0.168609	0.133021	0.00369144	0.754427	0.221652	0.00325471	4.62367		76.4747	4.18046	56920.8	39925.9	0.89538	0.14561	0.401596	1.66488	0.99938	0.624863	0.364042	0.497722	0.528517	0.321168	0.161116			0.105844	0.296565
324	2019-11	2021-07	0.598967	0.618396	1475	0.386632	0.760357	0.73013	0.295702	0.999695	58.8812	0.42979	41246.4	0.125276	0.134149	0.00367206	0.739356	0.224634	0.00383626	4.14229		66.7511	3.97144	89601.2	22960.2	1.58025	0.106719	0.443186	1.59361	0.998169	0.75247	0.360781	0.500402	0.531413	0.328467	0.161409			0.0984106	0.300034
325	2019-11	2021-08	0.607931	0.634862	1404	0.377622	0.767241	0.671897	0.307977	0.999695	56.4447	0.412005		0.113258	0.12291	0.00348688	0.767747	0.174717	0.00148495	4.25116		44.4848	2.4124	76329	19238.6	1.01459	0.115654	0.306471	1.2937	1	0.589146	0.361	0.463492	0.481823	0.350365	0.163651			0.109965	0.295432
326	2019-11	2021-09	0.635396	0.69513	1267	0.350775	0.787309	0.740745	0.32802	0.999756	57.8705	0.422413	26946.9	0.127963	0.128543	0.00366928	0.74944	0.152172	0.000188219	4.36191		1.15886	1.93597	29574.7	23102.9	0.51653	0.113278	0.263391	1.31622	0.999359	0.659722	0.364733	0.481892	0.499111	0.364964	0.167274			0.093722	0.29851
327	2019-11	2021-10	0.618875	0.681301	1369	0.367123	0.775168	0.68759	0.33684	0.999756	59.8916	0.437165		0.139936	0.138766	0.00389111	0.782599	0.202051	0.000666302	4.50385		21.751	2.07385	67860.5	17260.4	0.513409	0.0938185	0.317513	1.79745	1	0.779054	0.356573	0.472232	0.484235	0.357664	0.170899			0.0959218	0.317866
328	2019-11	2021-11	0.632664	0.704639	1318	0.353826	0.785062	0.736307	0.343635	0.999756	56.7098	0.41394	38324.1	0.131022	0.125154	0.00355484	0.754548	0.185095	0.00103476	4.20737		23.0454	2.27391	57705.5	21405.6	0.539957	0.12365	0.277939	2.38124	0.996926	0.599908	0.372067	0.488613	0.504392	0.357664	0.174231			0.0983283	0.274365
329	2019-11	2021-12	0.636977	0.710095	1292	0.349567	0.788197	0.724175	0.348194	0.999756	55.5338	0.405356		0.13648	0.121691	0.0034248	0.768756	0.176967	0.00216777	3.9542		43.5828	2.05893	69528.4	17550.5	1.41159	0.0854783	0.301252	2.72179	0.998766	0.596353	0.361692	0.477307	0.494846	0.372263	0.176664			0.0977178	0.259069
330	2019-12	2020-01	0.804307	0.940218	627	0.187668	0.896449	0.799093	0.615388	1	54.0833	0.394768		0.101307	0.111203	0.00333245	0.767806	0.161062	0.000538098	3.83978		32.8837	2.33931	3717.77	2319.94	0.407709	0.101779	0.29787	0.93427	0.997497	0.776224	0.50669	0.606954	0.621659	0.262774	0.181548			0.0366899	0.285638
331	2019-12	2020-02	0.765725	0.914862	771	0.224912	0.873295	0.849707	0.539233	0.999939	51.8941	0.378789		0.0981883	0.102768	0.00322064	0.795905	0.146784	0.000383709	3.51664		11.7053	1.95337	6523.34	3785.07	0.582974	0.117397	0.292659	1.15909	0.999377	0.707955	0.486452	0.620518	0.652274	0.255474	0.182699			0.0423114	0.277046
332	2019-12	2020-03	0.729861	0.767426	892	0.259378	0.850986	0.756653	0.466444	0.999817	53.9444	0.393755	23279.1	0.101197	0.110986	0.0033446	0.776255	0.173016	0.000413998	3.79813		33.0472	2.46592	39722.1	26629.1	0.634829	0.0948701	0.306429	1.31508	0.998496	0.819123	0.461339	0.581339	0.609328	0.284672	0.177967			0.0613825	0.265635
333	2019-12	2020-04	0.57858	0.228747	1330	0.403887	0.746956	0.734676	0.244231	0.999329	54.3875	0.396989	30698.7	0.187402	0.127342	0.00333603	0.798188	0.308903	0.0204756	4.8528		133.229	7.49265	284676	74762.7	2.8243	0.15662	1.32584	3.16213	1	0.794714	0.328264	0.503407	0.523014	0.357664	0.166418			0.0840566	0.302702
334	2019-12	2020-05	0.612492	0.249937	1247	0.371684	0.771737	0.762715	0.262592	0.999451	53.0943	0.387549		0.167353	0.116856	0.00331628	0.766003	0.299747	0.017674	4.59974		155.362	7.22926	278025	72203.4	2.47816	0.119316	0.900795	2.10704	1	0.753939	0.351992	0.506679	0.521847	0.357664	0.171505			0.0860768	0.272381
335	2019-12	2020-06	0.620679	0.342514	1273	0.364443	0.777175	0.763572	0.295094	0.999695	56.5066	0.412457		0.137238	0.126737	0.00350945	0.779581	0.273775	0.00644019	4.47207		66.1779	4.59632	230515	67698.6	1.36195	0.145526	0.563594	2.50079	0.968369	0.73776	0.355681	0.496022	0.519011	0.328467	0.166146			0.103207	0.298091
336	2019-12	2020-07	0.627405	0.500589	1259	0.358077	0.781916	0.792526	0.299887	0.999512	56.5774	0.412974		0.105747	0.123871	0.00356518	0.776837	0.193448	0.00433621	4.17149		66.1762	4.04524	160297	49220.9	1.3518	0.134232	0.496122	2.02646	0.999343	0.695313	0.3586	0.469377	0.477838	0.343066	0.16101			0.111535	0.284818
337	2019-12	2020-08	0.626324	0.535323	1235	0.358803	0.781377	0.763387	0.308575	0.999695	55.1453	0.40252		0.137599	0.120664	0.00343483	0.783003	0.174126	0.0150596	3.89874		112.394	5.94356	142290	38681.8	1.94129	0.115039	0.530736	3.06574	1	0.729916	0.355705	0.465924	0.479923	0.350365	0.159579			0.121363	0.290423
338	2019-12	2020-09	0.615818	0.521365	1297	0.3692	0.773608	0.818447	0.311695	0.999634	53.1695	0.388099	32168.4	0.127315	0.110556	0.00323232	0.752544	0.123207	0.00430882	3.89549		45.1071	4.48902	154222	44387.8	0.702309	0.126499	0.59283	2.13152	0.999335	0.757196	0.367618	0.484759	0.495318	0.328467	0.163118			0.112562	0.283714
339	2019-12	2020-10	0.59837	0.539126	1380	0.38623	0.760666	0.792662	0.301098	0.999573	54.1479	0.39524		0.0913149	0.11365	0.00331713	0.769412	0.185589	0.00351025	4.08645		22.5562	4.09843	134080	46732.1	0.705109	0.156803	0.553455	2.43374	1	0.771576	0.353621	0.470164	0.474661	0.328467	0.165436			0.114173	0.283549
340	2019-12	2020-11	0.614717	0.494129	1288	0.370115	0.77292	0.715791	0.309963	0.999512	56.3205	0.411099		0.155066	0.123667	0.0035126	0.786424	0.244552	0.0109968	4.28199		122.395	5.47709	136133	58509.7	2.35942	0.124634	0.644223	1.39885	0.99933	0.694345	0.354036	0.488274	0.490233	0.343066	0.166781			0.0996591	0.300581
341	2019-12	2020-12	0.633283	0.525643	1223	0.352247	0.786226	0.75781	0.316331	0.999512	53.7494	0.392332	40971.7	0.159834	0.114114	0.00326703	0.771432	0.202721	0.0114364	4.03022		132.688	5.05096	118419	55099.2	2.52001	0.150397	0.536347	1.56651	0.989253	0.756914	0.369537	0.486391	0.494319	0.357664	0.171373			0.0931315	0.254113
342	2019-12	2021-01	0.639246	0.48928	1206	0.346552	0.790407	0.739868	0.301257	0.999695	53.4416	0.390084		0.148285	0.112471	0.00347914	0.790292	0.189095	0.00894983	4.13615		132.862	5.51069	137789	58001.2	2.18892	0.147078	0.602423	1.53694	0.9951	0.728083	0.371085	0.495178	0.502383	0.350365	0.172068			0.0795475	0.260364
343	2019-12	2021-02	0.620982	0.452172	1297	0.364428	0.777186	0.750021	0.288066	0.999573	55.1634	0.402653	36231.1	0.131881	0.119258	0.00343757	0.763952	0.209191	0.00253607	4.21852		77.7535	4.3697	153400	63304.5	1.21538	0.112272	0.58133	2.00172	0.999347	0.76128	0.369439	0.525125	0.548729	0.313869	0.17001			0.0845008	0.296472
344	2019-12	2021-03	0.622222	0.566164	1309	0.363409	0.777947	0.692411	0.293323	0.999512	56.9473	0.415674	42514.5	0.104521	0.125407	0.00355347	0.770566	0.216496	0.000410099	4.43499		0.364798	2.5996	63754.4	58995.9	0.518746	0.132207	0.456514	1.07886	1	0.789699	0.380005	0.52758	0.536139	0.321168	0.162115			0.0988091	0.282822
345	2019-12	2021-04	0.621989	0.6004	1334	0.363884	0.777593	0.693025	0.298225	0.999512	59.2115	0.432201		0.10897	0.135649	0.00365785	0.779761	0.195593	0.000910498	4.37495		0.0879976	2.4327	40391.9	55255.8	0.714138	0.146498	0.403473	1.7486	0.998745	0.821342	0.386089	0.518381	0.540777	0.306569	0.160733			0.101787	0.278731
346	2019-12	2021-05	0.594454	0.636856	1477	0.390844	0.757112	0.707147	0.281682	0.999512	59.5903	0.434965		0.116551	0.137367	0.00374007	0.762008	0.281306	0.00236765	4.09143		55.148	5.04063	21103.8	51349.6	1.27995	0.151142	0.407712	1.63546	1	0.756907	0.370273	0.489134	0.507501	0.313869	0.161553			0.107557	0.277279
347	2019-12	2021-06	0.577646	0.653326	1572	0.407359	0.744224	0.660859	0.290013	0.999573	60.8605	0.444237	8610.92	0.130117	0.141821	0.00385581	0.780758	0.251517	0.000547663	4.61044		21.4904	2.4027	31583.1	39902.4	0.259023	0.137385	0.41783	2.00333	0.999385	0.723594	0.356784	0.497015	0.529215	0.29927	0.159908			0.112142	0.323224
348	2019-12	2021-07	0.581178	0.63621	1571	0.404064	0.746817	0.7452	0.286466	0.999695	58.7282	0.428673	10564	0.101871	0.133306	0.00371319	0.749824	0.261425	0.000983141	4.14932		11.7844	2.87974	62326.6	22886.2	0.987106	0.122274	0.478547	2.24743	0.999395	0.732582	0.354057	0.497526	0.520273	0.29927	0.160742			0.105543	0.298472
349	2019-12	2021-08	0.582561	0.65623	1532	0.402417	0.748109	0.659637	0.293724	0.999695	60.2993	0.440141	39462.8	0.0986547	0.139335	0.00382323	0.784819	0.210082	0.000808257	4.53174		10.5438	2.69809	48844.1	19190.3	0.330424	0.142587	0.30107	1.47372	0.99666	0.631533	0.348314	0.462521	0.4772	0.321168	0.162799			0.113268	0.324857
350	2019-12	2021-09	0.61584	0.71178	1363	0.369878	0.773098	0.724047	0.31299	0.999756	58.5064	0.427054		0.122482	0.131494	0.00371219	0.779808	0.177501	0.00247495	4.24153		54.3794	3.52902	18171.4	23059.1	1.17519	0.124398	0.296087	1.68942	1	0.731806	0.354933	0.471747	0.493893	0.343066	0.166711			0.0967591	0.288388
351	2019-12	2021-10	0.614368	0.701468	1401	0.371618	0.771787	0.636808	0.324227	0.999756	59.2537	0.432509		0.126858	0.134682	0.00384029	0.781683	0.249583	0.00304401	4.44617		76.7507	3.86763	40856.7	17059.2	1.15536	0.123587	0.333201	1.20401	0.998137	0.683176	0.354316	0.477361	0.485223	0.343066	0.170627			0.095961	0.307118
352	2019-12	2021-11	0.63385	0.727585	1324	0.352784	0.78583	0.726193	0.343354	0.999634	59.397	0.433555	19420.6	0.0969635	0.135312	0.00375225	0.76533	0.241372	0.000943584	4.18015		32.0371	2.31699	31583.2	21152.8	0.516603	0.138703	0.305225	1.46607	0.997563	0.720649	0.381731	0.508925	0.533148	0.335766	0.173049			0.088577	0.277065
353	2019-12	2021-12	0.642717	0.732996	1278	0.344103	0.792195	0.708106	0.348381	0.999756	57.55	0.420073	21841.8	0.11447	0.128656	0.00354858	0.798529	0.229122	0.00436523	4.07051		98.5819	4.49278	41794.8	17202	2.02023	0.122696	0.315894	1.87977	0.999156	0.638712	0.376377	0.510187	0.52418	0.343066	0.176191			0.0824265	0.264338
354	2020-01	2020-02	0.795158	0.92636	660	0.196487	0.891053	0.845152	0.583763	0.999939	49.6185	0.362179		0.114413	0.0939486	0.00317381	0.784901	0.193488	0.00156541	3.2879		44.5539	2.1303	7479.73	4656.05	0.859586	0.120151	0.224588	1.25977	0.993801	0.563034	0.505943	0.625919	0.658426	0.240876	0.182606			0.0340555	0.239905
355	2020-01	2020-03	0.7444	0.778593	833	0.245289	0.860211	0.73483	0.489024	0.999817	56.9473	0.415674		0.113441	0.123483	0.00350476	0.761474	0.232378	5.57335e-05	4.27262		0.294765	0.972593	37771.1	25766	0.4059	0.137892	0.282373	1.18104	1	0.742287	0.474076	0.586448	0.609004	0.277372	0.177863			0.0493317	0.285584
356	2020-01	2020-04	0.578025	0.229015	1325	0.404333	0.746605	0.730816	0.254878	0.999329	53.8609	0.393145	26221.2	0.178141	0.124829	0.00325239	0.747686	0.388013	0.0187665	4.92675		100.355	6.43031	282671	73949.5	2.59864	0.147817	1.23005	2.91572	1	0.71028	0.331087	0.506584	0.512008	0.343066	0.165752			0.0755323	0.295572
357	2020-01	2020-05	0.603604	0.249685	1276	0.380215	0.765269	0.73539	0.264178	0.999451	56.0892	0.40941		0.1727	0.128281	0.0035699	0.781859	0.383638	0.0159231	4.82728		122.486	5.88779	276016	71390.8	2.23799	0.146007	0.835217	2.07275	0.999302	0.628012	0.340249	0.49372	0.509622	0.357664	0.170961			0.085864	0.306774
358	2020-01	2020-06	0.61697	0.342739	1282	0.367968	0.774534	0.789507	0.29469	0.999695	57.1139	0.41689		0.139414	0.129424	0.00354844	0.754372	0.384946	0.0053239	4.35251		33.2987	3.10451	228475	66872	1.12961	0.140711	0.533778	2.35331	0.996559	0.748425	0.360818	0.509661	0.526827	0.335766	0.166766			0.099923	0.311703
359	2020-01	2020-07	0.620853	0.500784	1280	0.364361	0.777236	0.742127	0.304301	0.999512	58.6686	0.428238	37204.8	0.137021	0.133125	0.00369836	0.760452	0.254156	0.00345032	4.69847		33.2982	3.93781	158268	48540.5	1.12858	0.132554	0.46964	1.80631	1	0.755422	0.360432	0.475236	0.479182	0.350365	0.160855			0.108441	0.33243
360	2020-01	2020-08	0.610358	0.533633	1294	0.374205	0.769833	0.761535	0.306205	0.999695	55.6417	0.406144		0.164347	0.12326	0.00345951	0.783601	0.229197	0.013429	4.35364		79.5439	5.25324	140293	38044.3	1.71009	0.121128	0.506759	2.80558	0.998636	0.725237	0.35144	0.462596	0.476676	0.364964	0.159641			0.114587	0.318913
361	2020-01	2020-09	0.601652	0.525728	1350	0.38287	0.763241	0.782151	0.309474	0.999634	56.6745	0.413683	24444.1	0.163777	0.124995	0.00350018	0.787894	0.149225	0.00396268	4.167		12.3321	3.71962	152177	43726.6	0.502075	0.122358	0.550171	1.92136	1	0.691559	0.363932	0.472607	0.486282	0.350365	0.162709			0.110719	0.308754
362	2020-01	2020-10	0.582224	0.546469	1443	0.401838	0.748562	0.75792	0.299161	0.999573	54.5069	0.39786		0.137133	0.115152	0.00339143	0.782763	0.26082	0.00351193	4.23854		10.3874	3.52794	131987	45989.1	0.45402	0.152644	0.441298	2.4062	1	0.679385	0.34517	0.464609	0.466335	0.343066	0.165187			0.113469	0.300503
363	2020-01	2020-11	0.600894	0.502601	1339	0.383448	0.762799	0.73605	0.308042	0.999512	57.0877	0.416698	31069.4	0.167555	0.127073	0.00354523	0.794218	0.323665	0.009331	4.19043		89.5239	4.78013	134025	57696.3	2.12162	0.111983	0.552513	1.56859	1	0.721374	0.351513	0.483706	0.481615	0.357664	0.167399			0.099409	0.327131
364	2020-01	2020-12	0.61791	0.533637	1280	0.367078	0.775202	0.780581	0.312872	0.999512	55.5518	0.405487		0.164839	0.121366	0.00336275	0.748857	0.298761	0.009742	4.11255		99.8092	4.80758	116319	54321.3	2.28644	0.153077	0.478764	1.85055	0.995338	0.691731	0.364659	0.492056	0.495699	0.357664	0.171501			0.0958786	0.297089
365	2020-01	2021-01	0.627275	0.494614	1249	0.358085	0.78191	0.747615	0.302337	0.999695	54.2863	0.39625	38674.9	0.149094	0.115709	0.00348313	0.753466	0.26371	0.00726679	4.03951		99.9843	3.94623	135741	57239.3	1.94678	0.12619	0.511903	1.57138	0.969417	0.72946	0.366925	0.497535	0.506987	0.357664	0.172381			0.0840757	0.27605
366	2020-01	2021-02	0.60886	0.453563	1342	0.376121	0.768381	0.755962	0.286841	0.999573	56.6039	0.413167	30282.2	0.147771	0.125332	0.00349586	0.737217	0.285538	0.00153365	4.32159		44.8815	3.25664	151381	62526.5	0.985131	0.114361	0.494422	1.86924	0.998686	0.789688	0.359333	0.50616	0.517037	0.335766	0.169711			0.0982126	0.296095
367	2020-01	2021-03	0.604705	0.574085	1378	0.380348	0.765167	0.759761	0.285713	0.999512	52.6308	0.384166	35554.4	0.138541	0.107933	0.00321714	0.758927	0.303348	0.00111132	4.07005		32.6973	2.98388	61801.3	58215.5	0.303601	0.122145	0.423657	1.08448	1	0.77052	0.362459	0.497438	0.50729	0.343066	0.163639			0.109943	0.274387
368	2020-01	2021-04	0.606599	0.608174	1395	0.378767	0.766371	0.753304	0.288681	0.999512	58.112	0.424175	44472.8	0.11512	0.130638	0.0035455	0.77998	0.280776	0.00251085	4.14038		32.9148	2.9583	38685	54472.9	0.954638	0.129583	0.373256	1.58209	0.996998	0.702406	0.370938	0.490846	0.514916	0.328467	0.161067			0.110872	0.285103
369	2020-01	2021-05	0.580098	0.643132	1536	0.404743	0.746283	0.704048	0.275988	0.999512	59.6322	0.435272	31338.3	0.123089	0.137506	0.00376832	0.76158	0.380451	0.00423619	4.36352		88.0307	5.18101	20175.8	50586.8	1.48212	0.139261	0.417209	1.46628	1	0.790406	0.357393	0.478089	0.493284	0.328467	0.162934			0.115769	0.296353
370	2020-01	2021-06	0.561999	0.65325	1639	0.422532	0.732146	0.632502	0.284824	0.999573	61.3596	0.44788		0.129609	0.14399	0.00394546	0.751753	0.358059	0.00178121	4.7715		54.3639	3.71956	32431.2	39284	0.490869	0.14783	0.493619	1.93383	1	0.724529	0.340173	0.482094	0.507955	0.321168	0.161068			0.121721	0.341065
371	2020-01	2021-07	0.567295	0.632923	1630	0.41752	0.736161	0.755495	0.277661	0.999695	60	0.437956		0.11802	0.139178	0.00376473	0.769761	0.304967	0.00256377	4.03864		44.6322	4.26017	63859	22873.6	1.21878	0.115604	0.580351	2.10656	0.999392	0.763472	0.34403	0.486661	0.51098	0.321168	0.161427			0.110794	0.311385
372	2020-01	2021-08	0.576923	0.653304	1551	0.407836	0.743848	0.660593	0.287365	0.999695	59.9416	0.43753	28899.5	0.102057	0.138109	0.00378489	0.742124	0.260029	0.00162394	4.54338		22.3658	3.82987	50409.4	19294.7	0.576306	0.107396	0.355032	1.41187	0.998125	0.627375	0.343696	0.460212	0.468453	0.350365	0.162569			0.115028	0.323469
373	2020-01	2021-09	0.606419	0.712137	1398	0.378964	0.766221	0.742929	0.311051	0.999756	57.7062	0.421213	17749.3	0.13573	0.128455	0.00362959	0.766509	0.272615	0.00196347	4.16813		21.5009	3.51675	17272.7	22770.5	0.949456	0.0920897	0.315519	1.6358	1	0.678727	0.351591	0.468523	0.479801	0.357664	0.166881			0.103033	0.288775
374	2020-01	2021-10	0.602525	0.699187	1448	0.383069	0.763089	0.689293	0.320186	0.999756	60.4152	0.440987		0.118636	0.140381	0.00390274	0.754508	0.311069	0.00195666	4.47319		43.8682	3.25763	42399.4	16997.8	0.933591	0.0985425	0.418426	1.44364	0.99914	0.820536	0.350455	0.482258	0.486233	0.350365	0.171004			0.100566	0.339611
375	2020-01	2021-11	0.62324	0.730545	1365	0.363032	0.778229	0.758321	0.339323	0.999634	57.8878	0.422539		0.108261	0.128966	0.00360616	0.740801	0.322412	0.000539668	3.85046		1.52906	2.54981	32661.9	20882.5	0.292683	0.118819	0.387685	1.86178	1	0.765255	0.367229	0.496006	0.529997	0.343066	0.173735			0.0869598	0.28488
376	2020-01	2021-12	0.637	0.732801	1297	0.349596	0.788176	0.719195	0.345815	0.999756	57.6455	0.42077		0.124237	0.129382	0.00360532	0.780114	0.326115	0.00289671	4.08919		65.6987	3.80223	43058.1	17137.5	1.77951	0.113148	0.422353	2.19301	1	0.772757	0.368024	0.52831	0.536734	0.335766	0.17606			0.0805418	0.279801
377	2020-02	2020-03	0.762257	0.776494	771	0.228107	0.871264	0.719335	0.52363	0.999756	56.8946	0.415289	18952	0.123528	0.123438	0.00358063	0.784559	0.17033	0.00134876	4.23615		44.7229	2.19273	44722.1	26816.1	1.09757	0.0993326	0.273619	1.35099	0.952053	0.727375	0.505425	0.623766	0.641693	0.270073	0.178846			0.0465609	0.292139
378	2020-02	2020-04	0.56761	0.226251	1375	0.414531	0.738543	0.693083	0.245932	0.99939	53.9722	0.393958		0.192344	0.125193	0.00338061	0.740969	0.299546	0.0229551	4.84294		144.908	7.9323	289677	74726.6	3.10041	0.144621	1.23613	3.21563	0.999276	0.712969	0.334013	0.51649	0.5361	0.321168	0.166571			0.0818734	0.298489
379	2020-02	2020-05	0.599507	0.245592	1300	0.384274	0.762166	0.730326	0.261188	0.99939	54.037	0.394431	14488.9	0.184856	0.120652	0.00344969	0.729059	0.30216	0.0204161	4.71917		167.04	7.58288	283015	72175	2.77536	0.146498	0.829669	2.13181	0.996526	0.722881	0.347431	0.502363	0.52238	0.335766	0.172184			0.0885985	0.286601
380	2020-02	2020-06	0.609583	0.33817	1320	0.375213	0.769069	0.767072	0.290983	0.999634	56.6922	0.413811		0.161916	0.127198	0.00358073	0.732448	0.234921	0.00824273	4.36303		77.8524	4.65791	235467	67682.2	1.7319	0.110017	0.506618	2.61319	0.999337	0.648947	0.35861	0.501831	0.52595	0.328467	0.167265			0.105998	0.294809
381	2020-02	2020-07	0.605486	0.501285	1352	0.379349	0.765928	0.704926	0.29766	0.999573	59.0593	0.43109		0.123598	0.134978	0.00379226	0.796766	0.162933	0.00577753	4.68116		77.8514	5.0309	165237	49080.7	1.72089	0.128816	0.452795	2.25108	1	0.734226	0.353599	0.468512	0.478924	0.335766	0.161361			0.119942	0.338747
382	2020-02	2020-08	0.604894	0.538667	1324	0.379587	0.765747	0.693083	0.30628	0.999756	57.1314	0.417018	23658	0.165904	0.129555	0.00362005	0.749675	0.189331	0.0175193	4.34703		124.085	6.8317	147262	38574.3	2.27154	0.113753	0.472963	3.26095	1	0.816215	0.355102	0.456738	0.477149	0.350365	0.160012			0.119445	0.33344
383	2020-02	2020-09	0.598711	0.523224	1370	0.385807	0.760991	0.761934	0.306682	0.999695	55.5698	0.405619		0.153415	0.120459	0.00348109	0.735625	0.168047	0.0053309	4.17202		56.8019	4.21075	159137	44276.1	1.14745	0.122967	0.53646	2.45173	1	0.724396	0.371211	0.466314	0.48677	0.335766	0.163456			0.116867	0.302341
384	2020-02	2020-10	0.584487	0.540196	1441	0.399723	0.750217	0.791947	0.301255	0.999634	53.6563	0.391652	6660.98	0.132441	0.111745	0.00338016	0.75531	0.169554	0.00435137	3.84258		34.2521	3.90242	138903	46726.8	1.15828	0.121231	0.44297	2.71387	0.999339	0.735328	0.353374	0.45835	0.466585	0.328467	0.331208			0.123375	0.269219
385	2020-02	2020-11	0.596984	0.494636	1363	0.387326	0.759824	0.700114	0.305707	0.999451	56.9122	0.415418		0.180209	0.127172	0.00360258	0.77019	0.235336	0.0134189	4.18375		134.077	6.35028	140987	58531.2	2.66611	0.120605	0.549474	1.3608	0.997458	0.679974	0.357846	0.477495	0.481449	0.343066	0.167669			0.105973	0.313911
386	2020-02	2020-12	0.606248	0.52627	1336	0.37847	0.766597	0.713053	0.311972	0.999451	57.2887	0.418166		0.189193	0.129785	0.003653	0.745421	0.232064	0.0139472	4.43086		144.363	6.35015	123269	55197.7	2.81898	0.120132	0.492583	1.26605	0.975449	0.74208	0.356269	0.473427	0.479495	0.357664	0.17155			0.112541	0.31193
387	2020-02	2021-01	0.614071	0.488811	1311	0.370968	0.772277	0.701822	0.298681	0.999634	57.1227	0.416954		0.178691	0.12784	0.00374916	0.76775	0.202463	0.0114306	4.45717		144.538	5.74299	142668	58123.7	2.50385	0.128654	0.511755	1.42088	0.988724	0.621743	0.362615	0.48069	0.487571	0.350365	0.172882			0.0977426	0.299021
388	2020-02	2021-02	0.611966	0.449398	1336	0.373184	0.770604	0.771881	0.288659	0.999512	55.3173	0.403776	39678.8	0.145443	0.11966	0.00345292	0.72722	0.200848	0.00390122	4.07661		89.434	4.76622	158322	63399.4	1.61425	0.094968	0.468513	2.24381	0.998835	0.736478	0.371771	0.519049	0.53958	0.313869	0.339491			0.100003	0.268862
389	2020-02	2021-03	0.594556	0.566584	1430	0.390284	0.757545	0.68843	0.282894	0.999451	56.6039	0.413167	14087.2	0.122776	0.123678	0.00353894	0.757138	0.181047	0.000484244	4.29543		11.9238	2.85026	68532	59065.1	1.0061	0.144784	0.413054	1.34809	0.998714	0.738513	0.369932	0.522143	0.527228	0.321168	0.163073			0.110818	0.289679
390	2020-02	2021-04	0.604202	0.602457	1413	0.381171	0.764539	0.716813	0.288425	0.999451	58.8812	0.42979		0.115281	0.133253	0.00371432	0.726775	0.159047	0.00023061	4.33569		11.6718	1.87581	45163	55318.4	0.306682	0.129379	0.331806	1.9979	0.969522	0.690878	0.375071	0.51594	0.541825	0.29927	0.161424			0.113455	0.300879
391	2020-02	2021-05	0.576662	0.639575	1560	0.408163	0.74359	0.698644	0.279172	0.999451	59.9833	0.437835		0.130544	0.138263	0.00386466	0.766666	0.262898	0.00138068	4.49352		43.4906	4.16036	24356.6	51336.8	0.91389	0.137169	0.396463	1.81141	0.999378	0.718166	0.364437	0.502738	0.518151	0.29927	0.162384			0.118542	0.295493
392	2020-02	2021-06	0.56084	0.671141	1653	0.423738	0.731176	0.663048	0.283786	0.999512	61.1474	0.446331	11227.9	0.145864	0.142669	0.00395689	0.771494	0.235773	0.000300212	4.61003		9.99512	2.02006	26539.1	39725.1	0.515081	0.157758	0.49	2.30205	1	0.674614	0.348482	0.503503	0.530773	0.29927	0.160662			0.121685	0.310291
393	2020-02	2021-07	0.568182	0.65577	1634	0.41673	0.736791	0.751211	0.285143	0.999634	59.8498	0.43686	38847.5	0.123211	0.138121	0.00382397	0.741262	0.20864	0.000386563	4.16243		0.235698	2.53204	57142.9	22608.4	0.521711	0.112057	0.570511	2.64828	1	0.736196	0.352452	0.506162	0.527683	0.29927	0.160931			0.116984	0.308482
394	2020-02	2021-08	0.573091	0.672969	1577	0.411642	0.740838	0.683555	0.293079	0.999634	58.4722	0.426804		0.120187	0.131413	0.00371522	0.764723	0.192535	0.00104723	4.40527		22.1888	2.98717	43736.8	18693.6	0.456331	0.128901	0.346567	1.74411	0.999378	0.701048	0.355654	0.469822	0.48461	0.321168	0.164217			0.113701	0.308975
395	2020-02	2021-09	0.60313	0.716267	1420	0.382234	0.763727	0.66519	0.31132	0.999695	59.9166	0.437348		0.141787	0.138656	0.00385993	0.747196	0.166735	0.00364115	4.63126		66.0356	4.48445	19591.4	22552.5	1.57574	0.120031	0.2919	1.9174	0.999364	0.699502	0.356153	0.482521	0.495541	0.335766	0.167276			0.104745	0.310736
396	2020-02	2021-10	0.593266	0.714795	1498	0.392147	0.756106	0.661767	0.321906	0.999695	59.2115	0.432201		0.148908	0.135311	0.00388234	0.769603	0.232507	0.00466595	4.43251		88.4179	4.82856	35965.9	16348.9	1.55677	0.118269	0.40264	1.2778	1	0.752935	0.354681	0.482432	0.486588	0.335766	0.171742			0.102504	0.326715
397	2020-02	2021-11	0.619008	0.746697	1391	0.367212	0.775101	0.754424	0.337274	0.999695	57.3149	0.418357		0.131958	0.127065	0.00360517	0.77155	0.199146	0.00210972	3.65605		43.671	3.41419	26710.4	20467.1	0.983847	0.149458	0.382859	1.41215	1	0.732123	0.380103	0.519094	0.544372	0.313869	0.174808			0.0923114	0.264532
398	2020-02	2021-12	0.62538	0.752217	1355	0.360948	0.779782	0.683357	0.340116	0.999695	58.0259	0.423546	25746.6	0.160305	0.132133	0.0036734	0.760655	0.21156	0.00655098	4.22381		110.246	5.44723	36339	16258.4	2.34356	0.117403	0.420172	1.70081	1	0.720885	0.368829	0.511947	0.525261	0.335766	0.177003			0.091855	0.279755
399	2020-03	2020-04	0.60618	0.287054	1198	0.376848	0.767829	0.669643	0.271393	0.99939	55.3534	0.404039	12890.7	0.189655	0.129176	0.00335792	0.751207	0.268662	0.0183259	4.71998		100.186	6.25653	245539	48796	2.48368	0.141995	1.20781	3.07909	1	0.862217	0.355111	0.554963	0.581075	0.306569	0.164003			0.0692159	0.29138
400	2020-03	2020-05	0.610689	0.310159	1231	0.373143	0.770635	0.713998	0.283355	0.999512	54.4518	0.397458		0.157609	0.120869	0.00338398	0.786278	0.235235	0.0155691	4.35135		122.318	5.92629	238875	46267.4	2.11781	0.106323	0.780679	2.25712	1	0.79951	0.356687	0.532442	0.554827	0.343066	0.169144			0.0768911	0.287588
401	2020-03	2020-06	0.6186	0.425595	1259	0.366201	0.775859	0.734461	0.315111	0.999756	56.2939	0.410904	44206.6	0.147796	0.125523	0.00347453	0.769363	0.184057	0.00518432	4.29923		33.1315	2.96054	191310	41780.3	0.994824	0.136564	0.447674	2.47346	0.998655	0.768254	0.361819	0.508198	0.54052	0.328467	0.164742			0.0899985	0.296983
402	2020-03	2020-07	0.610912	0.599173	1305	0.373818	0.770125	0.742983	0.323029	0.999573	54.6717	0.399064	23925.7	0.127343	0.115789	0.00339223	0.793643	0.140623	0.00328863	4.35177		33.1306	3.55776	120972	23925.2	0.985402	0.143701	0.370846	1.97253	0.999332	0.738743	0.358212	0.477118	0.492409	0.335766	0.159224			0.107588	0.276229
403	2020-03	2020-08	0.607002	0.616384	1291	0.377265	0.767513	0.738673	0.319834	0.999756	53.9351	0.393687	43705.9	0.140821	0.115554	0.00326987	0.769775	0.180836	0.0130649	3.90699		79.3687	5.25886	102945	13738	1.57232	0.134803	0.395585	2.88314	0.999311	0.843595	0.362871	0.478167	0.507326	0.364964	0.158003			0.102574	0.287153
404	2020-03	2020-09	0.591625	0.612142	1375	0.392409	0.755903	0.749844	0.320123	0.999695	53	0.386861		0.129012	0.108809	0.00322679	0.777147	0.189984	0.00356783	4.03996		12.1354	3.1996	114943	19441.8	0.418066	0.138445	0.455311	1.96581	1	0.752981	0.374359	0.482579	0.51706	0.343066	0.161112			0.0995026	0.27192
405	2020-03	2020-10	0.575474	0.644227	1454	0.408198	0.743563	0.674872	0.313095	0.999634	58.6345	0.427989		0.133033	0.132249	0.00367417	0.810089	0.181559	0.00311385	4.76391		10.5308	2.89422	94775.9	21415.7	0.339935	0.149387	0.422799	2.50269	0.99866	0.743486	0.348004	0.469316	0.47969	0.357664	0.162701			0.113336	0.310871
406	2020-03	2020-11	0.590759	0.605349	1364	0.393084	0.75538	0.662182	0.321005	0.999573	56.2672	0.41071	44373.1	0.16165	0.123337	0.00349104	0.788961	0.182104	0.00913346	4.45111		89.3538	4.79175	96761.5	32901.7	1.99479	0.133901	0.520426	1.70778	0.999319	0.775184	0.354964	0.476458	0.4962	0.364964	0.164747			0.105271	0.292832
407	2020-03	2020-12	0.593508	0.645084	1365	0.390558	0.757333	0.695106	0.329975	0.999573	53.1319	0.387824		0.15795	0.112205	0.0032119	0.752686	0.200618	0.00957484	4.20618		99.6422	4.80948	79148.6	29620	2.1631	0.137925	0.41227	2.03993	0.949699	0.713886	0.350225	0.460037	0.471505	0.372263	0.169556			0.110508	0.264847
408	2020-03	2021-01	0.609567	0.598585	1306	0.375072	0.769176	0.721412	0.315757	0.999634	52.192	0.380963		0.154922	0.107714	0.00338114	0.77753	0.174073	0.0071811	4.0793		99.8167	3.97412	98504.7	32603.2	1.82108	0.132012	0.47411	1.81924	0.990374	0.682958	0.363647	0.474312	0.486805	0.379562	0.342202			0.0998844	0.256025
409	2020-03	2021-02	0.605596	0.554446	1339	0.379105	0.766114	0.694429	0.309592	0.999512	55.9196	0.408172		0.14295	0.121649	0.00349933	0.763778	0.170867	0.00157406	4.44355		44.711	3.00765	114178	37686.1	0.817234	0.114982	0.454113	2.04783	1	0.731394	0.369854	0.518973	0.547952	0.335766	0.167899			0.097782	0.291736
410	2020-03	2021-03	0.589014	0.691855	1429	0.395407	0.753578	0.644165	0.296063	0.999573	58.2495	0.425179		0.123417	0.130312	0.00363004	0.772199	0.183841	0.00093573	4.37854		32.8585	2.49627	24537.5	33477.5	0.341374	0.155259	0.356217	1.36184	1	0.750391	0.372133	0.516367	0.526234	0.350365	0.160598			0.108064	0.29105
411	2020-03	2021-04	0.597502	0.727361	1418	0.387432	0.759742	0.66312	0.307394	0.999573	59.3464	0.433186	28947.1	0.112857	0.13548	0.00370945	0.782053	0.163149	0.00225805	4.32083		33.0785	3.00609	9265.08	29718.3	1.17686	0.15556	0.335563	1.68041	0.939348	0.741017	0.37456	0.497425	0.523353	0.328467	0.158933			0.114232	0.297387
412	2020-03	2021-05	0.569819	0.709305	1565	0.41457	0.738513	0.67385	0.294821	0.999573	58.3866	0.42618		0.140743	0.131573	0.00362289	0.744898	0.193623	0.00389772	4.02514		88.1951	5.14312	28712.4	25761.5	1.66766	0.164539	0.388766	1.67229	0.99937	0.66121	0.362553	0.496579	0.515994	0.321168	0.160526			0.115562	0.282401
413	2020-03	2021-06	0.553941	0.67858	1658	0.430202	0.72595	0.681691	0.296829	0.999634	60.349	0.440504	29967	0.159923	0.13994	0.00383482	0.769074	0.200561	0.00152463	4.63343		54.5234	3.92509	64970.3	15713.9	0.7441	0.17481	0.481738	2.15044	1	0.736863	0.34993	0.483506	0.516325	0.328467	0.159164			0.118022	0.3237
414	2020-03	2021-07	0.558077	0.62939	1655	0.426327	0.729088	0.718656	0.279709	0.999756	58.0775	0.423924		0.12645	0.131096	0.00363664	0.764202	0.201837	0.00225978	4.20101		44.8012	4.46346	98388.2	12795.7	1.42667	0.127553	0.567208	2.13328	1	0.713476	0.346656	0.494228	0.529269	0.321168	0.158987			0.113891	0.294513
415	2020-03	2021-08	0.570093	0.645201	1564	0.414305	0.738724	0.623315	0.293342	0.999756	60.597	0.442314	29871.3	0.12218	0.140964	0.00380192	0.770459	0.160574	0.00131283	4.74868		22.5363	3.83898	85245.1	15397.2	0.847977	0.140736	0.332656	1.56285	1	0.710345	0.358054	0.476685	0.49847	0.343066	0.160836			0.10795	0.30956
416	2020-03	2021-09	0.600966	0.718147	1405	0.38409	0.762308	0.677794	0.318139	0.999817	58.7112	0.428549		0.149688	0.133196	0.00370175	0.74887	0.147256	0.00175083	4.38167		21.3466	3.15629	35014.7	10711.6	0.776428	0.135376	0.33676	1.64367	0.999355	0.767612	0.354727	0.494773	0.519088	0.343066	0.165253			0.0995261	0.286399
417	2020-03	2021-10	0.592327	0.684876	1477	0.392819	0.755585	0.677824	0.322902	0.999817	58.7792	0.429046		0.14774	0.133763	0.00374991	0.716517	0.185434	0.00201788	4.5317		43.7048	3.54248	76403.7	14732.6	0.76646	0.129551	0.42837	1.55185	0.999369	0.689134	0.357178	0.505228	0.517078	0.350365	0.16932			0.0976664	0.292195
418	2020-03	2021-11	0.60022	0.71657	1452	0.385248	0.76142	0.655677	0.328881	0.999817	60.2329	0.439656	34535.5	0.104883	0.140328	0.00380299	0.776705	0.177203	0.000458589	4.52396		1.82267	2.71486	65832	11221.2	0.372013	0.166985	0.404042	1.92053	1	0.750383	0.360177	0.513542	0.539276	0.328467	0.17091			0.0946846	0.27704
419	2020-03	2021-12	0.614074	0.716538	1382	0.371705	0.771721	0.668747	0.332442	0.999817	58.6686	0.428238	44278.5	0.133568	0.135182	0.00362359	0.75384	0.152326	0.00303025	4.02062		65.5362	4.26555	78811.4	14743.1	1.64548	0.125683	0.426574	2.29732	1	0.756542	0.361757	0.513064	0.533946	0.343066	0.174175			0.0888393	0.271137
420	2020-04	2020-05	0.642696	0.85794	949	0.339778	0.795342	0.806971	0.415286	0.999878	51.2152	0.373834		0.119314	0.102205	0.00310329	0.724929	0.12861	0.00146262	3.67124		22.1333	2.41663	6940.88	2632.72	0.709202	0.121093	0.470589	1.79929	1	0.652763	0.357408	0.515509	0.526611	0.372263	0.158856			0.0471039	0.235961
421	2020-04	2020-06	0.608999	0.638868	1121	0.373169	0.770616	0.763952	0.334288	0.999634	51.4296	0.375398		0.145633	0.107232	0.00307409	0.734471	0.150272	0.00534433	3.82239		67.0566	4.3641	54381.5	7290.4	1.97071	0.103964	0.854729	1.28238	0.999229	0.673718	0.346648	0.492967	0.511324	0.372263	0.155135			0.0809754	0.255848
422	2020-04	2020-07	0.580853	0.422526	1239	0.400582	0.749545	0.751673	0.271097	0.999573	54.7631	0.399731	41516.5	0.158129	0.121479	0.00331865	0.775989	0.219681	0.00717255	4.55516		67.0581	4.88611	124821	26067.1	2.04232	0.124894	0.983033	1.84475	1	0.797937	0.334321	0.45468	0.478046	0.386861	0.150534			0.0889645	0.315241
423	2020-04	2020-08	0.571873	0.372172	1239	0.408776	0.743106	0.75246	0.254602	0.999634	52.5642	0.383681		0.161894	0.113152	0.00312097	0.73224	0.232115	0.001143	4.30902		20.9493	3.29493	142934	36700.3	1.43799	0.147889	0.886789	1.63869	1	0.739398	0.315582	0.440134	0.470303	0.40146	0.149871			0.0922983	0.293055
424	2020-04	2020-09	0.55649	0.38901	1319	0.423979	0.730981	0.711406	0.257426	0.999695	53.5444	0.390835	21875.7	0.184364	0.119787	0.00317459	0.76891	0.281761	0.00751851	4.46825		88.1389	5.0126	131086	31269.6	2.56493	0.142236	0.851096	2.34395	0.998449	0.755462	0.315585	0.435426	0.460304	0.379562	0.152097			0.101789	0.300082
425	2020-04	2020-10	0.525834	0.375584	1450	0.453834	0.706478	0.752728	0.243382	0.999756	52.192	0.380963		0.193427	0.115228	0.00313781	0.754644	0.233095	0.00853596	4.30599		110.679	5.50815	151324	28296.5	2.49018	0.136304	0.878242	2.43584	0.999231	0.706832	0.295845	0.411005	0.431359	0.379562	0.153653			0.111143	0.285878
426	2020-04	2020-11	0.552989	0.421443	1316	0.427134	0.728436	0.730307	0.275874	0.999695	52.6688	0.384444		0.162313	0.11349	0.00318041	0.763449	0.169541	0.00269291	4.46558		10.843	3.99805	149225	16559.2	0.833617	0.131322	0.76044	3.20635	1	0.68202	0.305106	0.425585	0.458496	0.379562	0.155564			0.104517	0.289058
427	2020-04	2020-12	0.551192	0.387637	1337	0.429076	0.726864	0.765728	0.271381	0.999695	52.3163	0.381871	18087.9	0.140088	0.113267	0.00307038	0.756436	0.182316	0.00315176	4.39178		0.986673	4.1936	166664	20048.1	0.612096	0.150868	0.87339	3.76296	1	0.709282	0.296979	0.417875	0.447024	0.386861	0.159118			0.108274	0.265277
428	2020-04	2021-01	0.562269	0.41528	1304	0.418485	0.73539	0.734242	0.270551	0.999512	53.4603	0.390221	37022.9	0.145741	0.11586	0.00335973	0.722536	0.191821	0.0044768	4.40361		0.679144	3.5737	147316	17517.4	1.06838	0.143865	0.876141	2.41005	1	0.824862	0.29928	0.43325	0.459299	0.394161	0.159752			0.0947316	0.261084
429	2020-04	2021-02	0.55245	0.448553	1361	0.428257	0.727528	0.697202	0.264329	0.999634	54.0463	0.394498	35096.8	0.168343	0.121108	0.00321278	0.747536	0.198511	0.0113738	4.37885		55.4759	4.50565	131571	12345.3	1.98302	0.120309	0.872584	1.86662	1	0.845252	0.305242	0.452805	0.484992	0.364964	0.157493			0.100331	0.291442
430	2020-04	2021-03	0.539326	0.35924	1435	0.441267	0.716907	0.672056	0.258858	0.999695	53.9537	0.393823		0.200624	0.124625	0.00329852	0.745436	0.220425	0.0206664	4.56155		133.036	5.81116	222494	16523.1	2.47662	0.152238	0.974219	3.05989	0.999254	0.853205	0.304866	0.449456	0.473317	0.364964	0.151862			0.108752	0.288284
431	2020-04	2021-04	0.541706	0.329249	1456	0.439348	0.718484	0.651234	0.250954	0.999695	56.9912	0.415994	44841.4	0.195144	0.13715	0.00349252	0.754722	0.268404	0.0254363	4.74891		133.261	7.00181	247376	20192.8	3.02686	0.158678	1.09428	2.36352	0.999271	0.738716	0.309349	0.434147	0.458665	0.357664	0.150633			0.114506	0.309132
432	2020-04	2021-05	0.500301	0.304312	1659	0.479896	0.684301	0.580294	0.233679	0.999695	57.0175	0.416186	29901.2	0.222921	0.139398	0.00353037	0.764422	0.263744	0.0247971	4.66297		188.375	9.58518	272292	23829.8	3.40195	0.170765	1.27261	2.33873	0.99928	0.803712	0.286278	0.419814	0.441352	0.364964	0.151469			0.122552	0.308917
433	2020-04	2021-06	0.478465	0.264277	1780	0.501408	0.665414	0.60853	0.209755	0.999756	57.0964	0.416762		0.222772	0.140142	0.00360884	0.785603	0.248221	0.0226317	5.24313		154.687	8.79968	309079	35569.4	2.78946	0.187452	1.47351	2.39476	1	0.829508	0.272227	0.418392	0.451776	0.350365	0.15027			0.128465	0.327611
434	2020-04	2021-07	0.486172	0.229733	1765	0.494121	0.671872	0.689837	0.20365	0.999634	55.5428	0.405422	22382.4	0.22398	0.137558	0.00345445	0.765964	0.272388	0.0235253	4.76542		144.986	9.14483	342839	54624.3	3.25682	0.135843	1.61723	2.17552	1	0.796103	0.283696	0.426447	0.455005	0.350365	0.150679			0.116515	0.302143
435	2020-04	2021-08	0.494749	0.231112	1684	0.485303	0.679604	0.569201	0.212242	0.999634	57.2887	0.418166	23601.9	0.185954	0.140024	0.00360019	0.776532	0.245331	0.0161788	5.42343		122.72	7.97617	330108	59062.9	2.87366	0.138016	1.41137	2.33508	1	0.761262	0.274744	0.409175	0.431588	0.386861	0.152085			0.123064	0.335527
436	2020-04	2021-09	0.52486	0.258414	1529	0.455738	0.704883	0.721417	0.222816	0.999573	54.3783	0.396922	36376.4	0.194593	0.128028	0.00338916	0.766603	0.242592	0.0103017	4.58817		78.8945	6.00076	278925	53677.8	2.07843	0.138572	1.35168	2.26695	1	0.729574	0.285912	0.438	0.46732	0.379562	0.15563			0.106403	0.286551
437	2020-04	2021-10	0.523738	0.238323	1575	0.457317	0.703557	0.649201	0.222142	0.999573	57.4195	0.419121	34287.8	0.184465	0.139683	0.00367706	0.768603	0.235837	0.0112179	5.05312		56.5054	6.08201	321100	60369.3	2.13355	0.131912	1.51487	2.96724	0.999279	0.836097	0.293429	0.438929	0.467627	0.372263	0.159014			0.111298	0.338099
438	2020-04	2021-11	0.524752	0.246243	1584	0.456484	0.704257	0.724679	0.219902	0.999573	53.4228	0.389948		0.192369	0.12841	0.00334126	0.77766	0.221968	0.0172437	4.61062		101.266	7.46438	310384	55590.1	2.57069	0.171241	1.49247	4.01513	1	0.81496	0.295777	0.456741	0.487067	0.364964	0.160845			0.101979	0.276974
439	2020-04	2021-12	0.531695	0.233295	1544	0.449621	0.709992	0.757901	0.220807	0.999573	54.2402	0.395914	41965.6	0.177896	0.131013	0.00331768	0.785371	0.17695	0.0130551	4.80498		34.7199	6.99764	323745	60382.9	1.26093	0.126669	1.51665	4.10962	1	0.827067	0.291176	0.469925	0.503986	0.364964	0.16335			0.0932127	0.279234
440	2020-05	2020-06	0.680614	0.69587	916	0.304825	0.820181	0.781468	0.414643	0.999756	51.5752	0.376461	20355.3	0.103751	0.103776	0.00314532	0.719581	0.149902	0.00416884	3.73802		89.1878	3.63419	47679.3	4799.27	1.56721	0.141273	0.464912	1.48136	0.99852	0.685186	0.390503	0.535938	0.560172	0.350365	0.159645			0.0602653	0.236342
441	2020-05	2020-07	0.645314	0.458804	1052	0.339027	0.795887	0.747533	0.321423	0.999573	56.1427	0.409801		0.121338	0.122848	0.00352254	0.770817	0.206559	0.0062623	4.53858		89.1894	4.27975	118116	23526.2	1.62701	0.131508	0.570771	1.71156	0.998246	0.642148	0.363701	0.482244	0.501124	0.364964	0.153983			0.0798322	0.304849
442	2020-05	2020-08	0.638305	0.403504	1050	0.345395	0.791252	0.741403	0.299416	0.999634	52.5357	0.383472	32588.6	0.108807	0.109047	0.00324349	0.710604	0.230508	0.00151123	4.34247		43.0395	2.74761	136242	34154.5	0.97115	0.146991	0.499259	2.41014	0.999241	0.602449	0.355464	0.48201	0.513154	0.379562	0.153131			0.0770949	0.283273
443	2020-05	2020-09	0.60398	0.421671	1194	0.378807	0.766341	0.710594	0.29476	0.999695	52.4404	0.382777		0.151998	0.111062	0.00321263	0.742656	0.288232	0.00729514	4.19029		110.272	4.4251	124387	28726.3	2.20907	0.146211	0.465581	2.22044	0.998982	0.612859	0.345829	0.457387	0.484963	0.372263	0.156348			0.0885203	0.291458
444	2020-05	2020-10	0.583685	0.410432	1281	0.398569	0.751117	0.726042	0.282529	0.999756	53.8795	0.393281	40873.3	0.157614	0.117339	0.00337743	0.743167	0.233305	0.00807888	4.55669		132.812	5.00687	144613	25715.9	2.11871	0.155484	0.482433	2.40115	1	0.590586	0.321403	0.433444	0.454631	0.394161	0.157472			0.0993562	0.301841
445	2020-05	2020-11	0.602616	0.460183	1185	0.379929	0.765486	0.744957	0.311863	0.999817	51.8941	0.378789		0.111017	0.105218	0.00324491	0.779835	0.165629	0.00160521	4.29938		32.9719	2.97389	142528	13979.8	0.397955	0.137666	0.401394	2.2512	0.998501	0.646338	0.327007	0.449307	0.479334	0.394161	0.159903			0.0933763	0.268224
446	2020-05	2020-12	0.605587	0.423781	1186	0.377226	0.767542	0.814933	0.306261	0.999817	52.6688	0.384444		0.123029	0.109249	0.00327783	0.753746	0.153081	0.00144681	4.14391		22.6861	3.07497	159976	17479.1	0.271063	0.15497	0.479427	2.53028	1	0.718974	0.329005	0.437939	0.462011	0.394161	0.16406			0.0992589	0.259573
447	2020-05	2021-01	0.618715	0.450777	1145	0.36465	0.77702	0.742446	0.31692	0.999634	53.2635	0.388785		0.107366	0.110346	0.00347773	0.783756	0.178272	0.00255705	4.34257		22.505	2.24364	140607	14991.2	0.537963	0.159263	0.50602	1.44108	1	0.750683	0.339633	0.452722	0.474781	0.394161	0.16427			0.0840452	0.262336
448	2020-05	2021-02	0.609406	0.485448	1196	0.373867	0.770088	0.710367	0.305518	0.999756	53.1413	0.387893		0.119418	0.112485	0.00328206	0.722762	0.173509	0.00985283	4.24569		77.6086	4.03574	124866	9889.01	1.59578	0.134895	0.495208	1.62027	1	0.711229	0.344078	0.477844	0.506459	0.372263	0.162107			0.086569	0.281977
449	2020-05	2021-03	0.595534	0.391051	1268	0.387531	0.759666	0.678011	0.297201	0.999817	55.1906	0.402851	21098.3	0.17239	0.12413	0.00345523	0.724649	0.21532	0.0188711	4.33007		155.169	5.76615	215795	14007.4	2.13365	0.157112	0.582662	2.10109	1	0.702469	0.344879	0.460914	0.487342	0.372263	0.156042			0.0959402	0.287942
450	2020-05	2021-04	0.592327	0.358022	1307	0.390966	0.757018	0.655158	0.285599	0.999817	55.6327	0.406078		0.172396	0.127335	0.00350998	0.752754	0.232589	0.0227522	4.48116		155.394	6.89131	240691	17647.6	2.72603	0.172635	0.679608	2.04024	1	0.725666	0.342575	0.45353	0.488376	0.357664	0.154708			0.0964945	0.295089
451	2020-05	2021-05	0.56171	0.331708	1456	0.420931	0.733431	0.660222	0.265982	0.999817	56.7803	0.414455		0.206981	0.133872	0.00362307	0.756053	0.201876	0.0227994	4.27626		210.508	9.34985	265595	21266.8	3.12259	0.185234	0.887178	1.84666	0.999309	0.784258	0.326459	0.452054	0.484978	0.350365	0.156152			0.103402	0.305073
452	2020-05	2021-06	0.539115	0.288534	1573	0.443099	0.715397	0.640457	0.241061	0.999878	56.8419	0.414904	14950.9	0.215525	0.134407	0.00361941	0.786346	0.213539	0.0198705	4.92871		176.82	8.5147	302366	33007.4	2.45547	0.17749	1.08041	2.10786	0.999074	0.829343	0.31277	0.440877	0.471703	0.364964	0.154234			0.110835	0.324141
453	2020-05	2021-07	0.539264	0.250657	1590	0.443144	0.71536	0.642088	0.230319	0.999756	58.2065	0.424865		0.199284	0.142103	0.00373916	0.764937	0.250819	0.0205952	4.83482		167.118	8.88475	336126	52074.4	2.95981	0.148996	1.21838	2.11388	1	0.793776	0.311316	0.448474	0.478602	0.364964	0.154407			0.104541	0.322425
454	2020-05	2021-08	0.547108	0.251382	1519	0.435119	0.721948	0.647701	0.236923	0.999756	58.6089	0.427802		0.162463	0.14001	0.00374677	0.767809	0.237109	0.014009	4.92485		144.852	7.73287	323407	56505.6	2.54294	0.160658	0.984224	1.6537	1	0.758822	0.310013	0.424617	0.442078	0.379562	0.156334			0.110407	0.342546
455	2020-05	2021-09	0.578395	0.280654	1366	0.404501	0.746474	0.706888	0.252893	0.999695	56.3383	0.411228		0.172104	0.129747	0.00362127	0.766032	0.223467	0.00876216	4.75081		101.021	5.45572	272223	51121	1.69038	0.147262	0.929766	1.63618	0.999291	0.761375	0.31414	0.452513	0.48383	0.386861	0.159694			0.0912419	0.293461
456	2020-05	2021-10	0.56317	0.259039	1466	0.419697	0.73442	0.679093	0.24348	0.999695	56.356	0.411358		0.152574	0.129368	0.00370351	0.740414	0.185139	0.00873224	4.85353		78.6314	5.28209	314391	57814.8	1.73693	0.133256	1.08981	1.86217	0.999308	0.779213	0.308368	0.446439	0.472261	0.386861	0.163479			0.0979577	0.321124
457	2020-05	2021-11	0.564793	0.26651	1471	0.418254	0.735574	0.680356	0.246857	0.999573	57.0877	0.416698	45524.3	0.163458	0.134669	0.00364818	0.784666	0.196787	0.0136746	4.74989		123.394	7.23766	303677	53046.8	2.22069	0.16424	1.06501	2.67152	1	0.714845	0.315355	0.459717	0.482092	0.386861	0.165193			0.100894	0.278625
458	2020-05	2021-12	0.580102	0.253137	1397	0.403291	0.747424	0.760664	0.250476	0.999695	55	0.40146	39143.3	0.148284	0.126259	0.00348846	0.781886	0.153679	0.00902726	4.54011		56.8267	6.1527	317065	57839.3	0.808112	0.131951	1.09113	2.87328	0.999319	0.772627	0.31967	0.460169	0.486179	0.379562	0.167949			0.0930737	0.273916
459	2020-06	2020-07	0.71057	0.642541	868	0.276786	0.839378	0.780695	0.433567	0.999695	57.3411	0.418548		0.122242	0.126102	0.00361406	0.793329	0.177069	0.0004466	4.58087		0.181361	1.61189	70525.3	19219.8	0.173892	0.11505	0.277284	1.36965	1	0.607793	0.427312	0.558941	0.576707	0.328467	0.150788			0.0585932	0.326989
460	2020-06	2020-08	0.690645	0.562634	916	0.295675	0.826515	0.814716	0.375378	0.999756	51.9808	0.379422	24457	0.136065	0.105557	0.00313041	0.75501	0.197892	0.00313642	3.70667		46.2727	3.2401	88702	29679.4	0.954497	0.133442	0.264269	1.61925	0.997119	0.697083	0.39514	0.521796	0.544313	0.343066	0.149986			0.0679295	0.280761
461	2020-06	2020-09	0.659922	0.584122	1042	0.325523	0.805597	0.776868	0.362844	0.999817	54.1664	0.395375		0.142181	0.115277	0.00324969	0.760714	0.259621	0.00142309	3.93924		21.1382	2.04653	76820.3	24261.8	0.94955	0.129182	0.247868	1.90664	1	0.787916	0.386846	0.517374	0.546763	0.335766	0.152753			0.0743828	0.299201
462	2020-06	2020-10	0.628417	0.567979	1169	0.356077	0.783398	0.7303	0.346742	0.999878	54.0833	0.394768	38453.7	0.136837	0.115609	0.00331358	0.765523	0.196342	0.00167689	4.33842		43.6367	2.24408	96990.8	21212.1	0.88609	0.0900999	0.29101	2.04922	0.995957	0.636918	0.361118	0.486845	0.50902	0.343066	0.153921			0.089961	0.285961
463	2020-06	2020-11	0.638645	0.629486	1109	0.345914	0.790873	0.833806	0.368486	0.999817	50.2494	0.366784		0.137988	0.099581	0.00300257	0.765886	0.147443	0.00160041	3.84135		56.2275	2.46926	94875.4	9423.67	1.44352	0.117692	0.301066	2.5776	1	0.562905	0.359897	0.474565	0.502422	0.364964	0.156607			0.089335	0.253745
464	2020-06	2020-12	0.634374	0.582198	1136	0.350185	0.787743	0.811682	0.356605	0.999817	50.892	0.371475	42355.6	0.15013	0.103535	0.00304887	0.743078	0.159332	0.0019058	3.61662		66.511	2.6502	112347	13083	1.62927	0.118514	0.248679	3.13647	0.998589	0.735405	0.352901	0.462673	0.479822	0.379562	0.160169			0.106373	0.249002
465	2020-06	2021-01	0.662114	0.613688	1039	0.323474	0.807057	0.744876	0.374014	0.999756	54.3967	0.397056		0.124339	0.11448	0.00352938	0.759359	0.184631	0.00148747	4.27572		66.6858	1.78105	93009.2	10734.4	1.22454	0.126849	0.293061	1.83459	0.999293	0.711502	0.380828	0.488951	0.508586	0.364964	0.160322			0.0860714	0.278252
466	2020-06	2021-02	0.63447	0.648083	1158	0.350378	0.787601	0.807402	0.350185	0.999756	53.963	0.39389		0.128633	0.11354	0.00333046	0.735512	0.148036	0.00182283	3.90694		11.5932	2.3507	77330.2	5984.52	0.343189	0.0947576	0.288668	1.3314	1	0.67731	0.368811	0.503947	0.539206	0.350365	0.158214			0.0887089	0.284837
467	2020-06	2021-03	0.627014	0.533608	1204	0.357801	0.782121	0.644392	0.342167	0.999817	55.2087	0.402983	45015.8	0.156156	0.120938	0.00340764	0.76779	0.159511	0.00738085	4.30479		65.9871	3.85436	168230	9606.04	1.01525	0.12821	0.25047	2.52602	1	0.681249	0.375392	0.490022	0.533374	0.335766	0.152248			0.101875	0.289143
468	2020-06	2021-04	0.63312	0.492674	1203	0.352166	0.786285	0.745072	0.337453	0.999817	57.0701	0.41657		0.132611	0.128979	0.00351083	0.75659	0.1895	0.0100167	3.85619		66.2092	5.08942	193135	13167.4	1.75267	0.112813	0.367948	1.88998	0.99681	0.661503	0.377876	0.486056	0.526769	0.335766	0.15142			0.0974193	0.29842
469	2020-06	2021-05	0.597532	0.460629	1370	0.386896	0.760154	0.751694	0.313971	0.999817	56.1427	0.409801		0.158178	0.125565	0.00345824	0.740253	0.183464	0.010729	3.71348		121.326	7.02979	218034	16804.4	2.23729	0.119911	0.582964	1.76523	1	0.706408	0.35913	0.488829	0.539043	0.335766	0.152521			0.0948807	0.285488
470	2020-06	2021-06	0.588167	0.402412	1427	0.396169	0.752986	0.708389	0.296056	0.999878	58.0775	0.423924	20649.9	0.168486	0.134244	0.00367279	0.757203	0.180843	0.00832464	4.52787		87.647	5.99065	254748	28679.1	1.37169	0.141936	0.763831	1.73978	1	0.700428	0.353941	0.494264	0.546758	0.313869	0.151012			0.108382	0.306365
471	2020-06	2021-07	0.588235	0.349033	1442	0.396263	0.752913	0.739417	0.278723	0.999878	59.0931	0.431337	37218.3	0.160126	0.139549	0.00368262	0.745126	0.210269	0.0087124	4.25332		77.9301	6.33082	288506	47736.2	2.00468	0.123833	0.891576	1.66527	1	0.74771	0.360956	0.508641	0.555371	0.313869	0.150988			0.0938156	0.328155
472	2020-06	2021-08	0.600647	0.349923	1357	0.383876	0.762472	0.694966	0.285987	0.999878	58.5918	0.427677		0.123379	0.135102	0.00369348	0.775017	0.20505	0.00436049	4.62932		55.6639	5.05032	275793	52136.8	1.50724	0.115231	0.613317	1.66363	0.998018	0.766259	0.358425	0.486471	0.515885	0.328467	0.152977			0.103817	0.337863
473	2020-06	2021-09	0.625947	0.390754	1234	0.359139	0.781128	0.762405	0.299079	0.999817	55.4797	0.404962		0.161817	0.122445	0.00348646	0.752098	0.174297	0.00146954	4.38073		11.8746	2.60256	224631	46734.6	0.343273	0.114958	0.566356	1.62686	1	0.658923	0.36664	0.495726	0.53918	0.343066	0.15603			0.0893207	0.276944
474	2020-06	2021-10	0.613623	0.360212	1316	0.371437	0.771924	0.690124	0.294825	0.999817	58.4637	0.426742		0.143003	0.134279	0.00373966	0.764051	0.174754	0.00144582	4.60206		10.5902	2.87355	266792	53426.8	0.376307	0.117684	0.741143	2.32969	1	0.812167	0.350653	0.489059	0.527575	0.350365	0.159654			0.0905365	0.327183
475	2020-06	2021-11	0.613458	0.367897	1327	0.371709	0.771719	0.760202	0.294721	0.999695	56.1694	0.409996		0.12897	0.127012	0.00350197	0.765392	0.162206	0.00431276	4.16339		34.2198	4.54224	256053	48626.9	1.12572	0.138065	0.727872	3.32936	1	0.746508	0.350691	0.493356	0.518349	0.357664	0.161662			0.0945386	0.272801
476	2020-06	2021-12	0.605539	0.34936	1353	0.37931	0.765957	0.754049	0.288368	0.999817	55.9196	0.408172	30847.5	0.15032	0.127134	0.00343076	0.74547	0.124166	0.00301438	4.36926		32.4158	4.71098	269427	53438	1.02569	0.109884	0.754195	3.40964	1	0.771082	0.342048	0.489847	0.519248	0.357664	0.163492			0.0960514	0.257946
477	2020-07	2020-08	0.734932	0.840093	774	0.253189	0.855056	0.792384	0.498372	0.999817	53.3667	0.389538	35420.4	0.103213	0.10935	0.00325582	0.761138	0.160322	0.00426764	4.24125		46.2711	3.37015	18292.4	11082.2	0.972693	0.144469	0.252018	1.46305	1	0.680717	0.438269	0.551485	0.578746	0.328467	0.364268			0.062556	0.2941
478	2020-07	2020-09	0.694435	0.839333	928	0.292376	0.828782	0.76101	0.450313	0.999878	52.2303	0.381243	27742.8	0.107143	0.104995	0.00314155	0.738975	0.174816	0.000547859	3.85512		21.1332	2.0924	7170.8	5967.12	0.934352	0.129953	0.242421	1.27486	1	0.680501	0.414739	0.549619	0.58153	0.321168	0.37321			0.0710956	0.262234
479	2020-07	2020-10	0.671935	0.788369	1017	0.31418	0.813634	0.686155	0.405119	0.999817	59.3212	0.433001	20270.5	0.108868	0.135242	0.00373457	0.765876	0.148059	0.000734421	4.57352		43.6346	2.27085	26768.7	4219.5	0.87727	0.131769	0.283581	1.77426	0.992144	0.588504	0.3965	0.525445	0.536328	0.321168	0.14913			0.0912295	0.345567
480	2020-07	2020-11	0.659817	0.749242	1043	0.325632	0.805519	0.757122	0.383774	0.999634	55.3805	0.404237		0.126499	0.117662	0.00343881	0.772225	0.17242	0.00263245	4.43416		56.2281	1.94553	24906.2	10695.1	1.49491	0.123029	0.371523	2.10373	1	0.581806	0.383874	0.486526	0.502644	0.357664	0.151306			0.0962583	0.306767
481	2020-07	2020-12	0.66117	0.704888	1048	0.324458	0.806356	0.775732	0.385215	0.999634	55.0999	0.402189	27738.8	0.133352	0.118145	0.00338893	0.786768	0.171607	0.00317408	4.27975		66.5126	2.75895	42147.4	7865.62	1.68594	0.124253	0.255882	2.78615	1	0.764354	0.378144	0.474912	0.495007	0.364964	0.154422			0.0986104	0.284748
482	2020-07	2021-01	0.672921	0.71692	1011	0.313197	0.814325	0.778049	0.373922	0.999573	55.2901	0.403578	41629.8	0.129101	0.117645	0.00353468	0.726333	0.145772	0.00242515	4.33052		66.6872	2.74934	22833.2	10266.1	1.27527	0.14396	0.309678	1.75419	0.998597	0.70633	0.388529	0.485298	0.501781	0.364964	0.155391			0.0920473	0.287311
483	2020-07	2021-02	0.645617	0.715438	1128	0.339759	0.795356	0.717571	0.339858	0.999573	57.1139	0.41689	44399.4	0.109472	0.125454	0.00350588	0.76184	0.149002	0.00092883	4.68641		11.5945	2.72063	8562.78	15042.4	0.388544	0.119669	0.33826	1.4086	0.999309	0.741502	0.379589	0.498654	0.507108	0.343066	0.153016			0.0971885	0.320855
484	2020-07	2021-03	0.630949	0.63155	1202	0.354154	0.784819	0.63754	0.32937	0.999634	59.3296	0.433063	26705.1	0.112259	0.136113	0.00372775	0.775299	0.160115	0.00486487	4.76211		65.985	4.08619	97871.7	10947.2	1.02578	0.140187	0.260166	1.91402	0.999322	0.685997	0.377979	0.478456	0.497576	0.343066	0.147688			0.104967	0.328431
485	2020-07	2021-04	0.643898	0.619125	1173	0.341883	0.793813	0.726623	0.345577	0.999634	57.4717	0.419502	35778	0.130648	0.128978	0.00359603	0.750005	0.137142	0.00742071	4.2907		66.2073	5.31282	122689	7569.6	1.75554	0.147219	0.31696	1.56378	1	0.731572	0.385771	0.485239	0.501545	0.335766	0.147157			0.102294	0.313714
486	2020-07	2021-05	0.63097	0.610506	1244	0.354618	0.784477	0.686995	0.332766	0.999634	58.0172	0.423483	40923.4	0.146597	0.131651	0.00360556	0.792623	0.226774	0.00815801	4.37199		121.324	7.08199	147598	3724.67	2.23578	0.152651	0.505714	1.43664	1	0.699916	0.378831	0.501793	0.524377	0.321168	0.147748			0.0903418	0.318329
487	2020-07	2021-06	0.617151	0.590255	1317	0.368186	0.77437	0.677087	0.338328	0.999695	58.0603	0.423798	43782	0.152804	0.132058	0.0036822	0.779935	0.20231	0.00591611	4.62899		87.6439	5.73971	184441	9797.58	1.36804	0.143364	0.663056	1.62133	1	0.674747	0.376275	0.490409	0.51657	0.321168	0.146739			0.104075	0.330335
488	2020-07	2021-07	0.619706	0.530807	1320	0.365854	0.776119	0.72523	0.335452	0.999817	59.7495	0.436128	34467.9	0.144888	0.140115	0.00377942	0.786465	0.162177	0.00645516	4.67133		77.9285	6.11794	218094	28682.3	1.99876	0.11802	0.784313	1.4502	0.999132	0.746179	0.374319	0.507028	0.529638	0.321168	0.146645			0.0967945	0.338112
489	2020-07	2021-08	0.642473	0.534065	1197	0.343472	0.792655	0.679733	0.356523	0.999817	58.4038	0.426305	43528.7	0.121915	0.132025	0.00367558	0.756931	0.145399	0.00283641	4.75884		55.6628	4.82736	205411	33060.9	1.50291	0.136942	0.505885	1.33282	1	0.691165	0.386918	0.517141	0.543119	0.321168	0.148235			0.0930187	0.34271
490	2020-07	2021-09	0.658716	0.585955	1116	0.327561	0.804142	0.750625	0.364139	0.999756	57.6541	0.420833	42827.3	0.115442	0.128641	0.00362039	0.763302	0.16159	0.000459395	4.43696		11.8794	2.21971	154250	27704.5	0.355764	0.145411	0.472638	1.33887	1	0.724606	0.376961	0.498996	0.51886	0.357664	0.151301			0.0848642	0.300858
491	2020-07	2021-10	0.649154	0.544025	1182	0.337136	0.797256	0.723083	0.35017	0.999756	58.6686	0.428238	26439.8	0.12284	0.13322	0.00377504	0.768815	0.173126	0.000993192	4.43101		10.5932	2.89535	196410	34514.6	0.3699	0.133667	0.645633	1.97305	0.998448	0.687919	0.366908	0.491425	0.511793	0.350365	0.154556			0.092071	0.322095
492	2020-07	2021-11	0.632362	0.548428	1261	0.353518	0.785289	0.704501	0.332361	0.999756	59.4559	0.433984	27661.8	0.122016	0.138435	0.00378424	0.785894	0.143547	0.00296408	4.53069		34.2206	4.44789	185687	29825.1	1.12666	0.112129	0.62741	2.952	0.994155	0.634871	0.361504	0.474589	0.48796	0.372263	0.155693			0.0866629	0.312228
493	2020-07	2021-12	0.627778	0.519247	1273	0.357886	0.782058	0.724166	0.32565	0.999756	59.0847	0.431275	14969.2	0.121784	0.137899	0.00371818	0.772309	0.173986	0.0029483	4.4741		32.419	4.72116	199143	34629.4	1.07046	0.126071	0.660615	2.99107	0.998456	0.777415	0.34964	0.456151	0.472851	0.364964	0.157597			0.0866976	0.308276
494	2020-08	2020-09	0.732321	0.868779	776	0.255599	0.853474	0.83512	0.513961	0.999939	48.2286	0.352034	30683.6	0.119227	0.0913209	0.00280549	0.749026	0.165209	0.00459733	3.34877		67.2874	3.76184	12459.5	6206.58	1.63098	0.106373	0.236634	1.58295	0.99782	0.66363	0.454901	0.58583	0.612303	0.321168	0.40351			0.0416447	0.233397
495	2020-08	2020-10	0.705089	0.822989	875	0.281894	0.835927	0.695258	0.448189	0.999878	54.7996	0.399997	44068.7	0.118889	0.117201	0.00341503	0.739653	0.182494	0.00542294	4.45563		89.838	4.4112	10153.6	8955.6	1.53659	0.124153	0.257353	1.95493	1	0.684635	0.418893	0.551701	0.574222	0.321168	0.148258			0.0755532	0.329218
496	2020-08	2020-11	0.688776	0.737494	915	0.297368	0.825348	0.812994	0.401672	0.999695	48.9796	0.357515	14697.5	0.102478	0.0943092	0.00297485	0.779194	0.201434	0.000909369	3.73229		10.1491	2.04318	9716.94	20774.4	0.776137	0.128619	0.273856	3.0192	0.998535	0.666751	0.401193	0.529584	0.564456	0.350365	0.150929			0.0774677	0.273062
497	2020-08	2020-12	0.668552	0.694882	996	0.316996	0.811649	0.812403	0.37554	0.999695	48.5386	0.354297		0.120705	0.0961274	0.00292891	0.723806	0.175089	0.00144942	3.94653		20.4995	1.86926	24698	17560.6	1.01944	0.144651	0.21685	3.86084	1	0.646694	0.380289	0.508489	0.555651	0.364964	0.153926			0.0854002	0.272402
498	2020-08	2021-01	0.672854	0.698131	987	0.312936	0.814509	0.790092	0.373216	0.999634	50.1697	0.366202		0.115027	0.100877	0.00321165	0.756269	0.171526	0.00233656	3.86249		20.6397	2.55397	7131.22	20355.5	0.508767	0.153629	0.322731	2.69233	1	0.731542	0.389431	0.470869	0.495541	0.372263	0.154732			0.0958003	0.27015
499	2020-08	2021-02	0.650742	0.662208	1082	0.334467	0.799183	0.753304	0.333913	0.999634	53.3667	0.389538		0.11116	0.113286	0.00324948	0.752176	0.190997	0.00779214	4.12038		34.6809	4.12704	13055.2	25429.2	1.00348	0.122593	0.327678	1.94684	0.999287	0.825796	0.378684	0.485823	0.503745	0.357664	0.152552			0.105385	0.315958
500	2020-08	2021-03	0.630934	0.623233	1174	0.353828	0.78506	0.682398	0.324462	0.999695	55.6597	0.406275		0.136811	0.123576	0.00340753	0.710407	0.215757	0.0156194	4.07952		112.195	5.87214	79909.9	21093.7	1.60403	0.1588	0.312725	2.9208	0.997371	0.778297	0.376245	0.48509	0.517484	0.357664	0.146688			0.113808	0.308194
501	2020-08	2021-04	0.645723	0.615739	1139	0.339797	0.795328	0.662752	0.340214	0.999695	57.7495	0.421529	4928.16	0.163395	0.133644	0.0035999	0.7485	0.219654	0.0200072	4.33862		112.426	7.10924	104590	17333.3	2.27399	0.153243	0.367011	2.16468	1	0.717436	0.38138	0.484638	0.513776	0.350365	0.145618			0.109239	0.316124
502	2020-08	2021-05	0.624547	0.611995	1242	0.360522	0.780099	0.69978	0.328644	0.999695	56.6216	0.413296		0.188768	0.128966	0.00348343	0.758289	0.286152	0.0196961	3.88207		167.527	8.61463	129536	13312.4	2.70558	0.143228	0.554037	2.19224	0.999324	0.782418	0.377402	0.486357	0.516214	0.343066	0.14699			0.10518	0.2992
503	2020-08	2021-06	0.609172	0.625033	1321	0.375604	0.768773	0.618821	0.340034	0.999756	58.2323	0.425053		0.192951	0.135185	0.00368445	0.771431	0.245173	0.0169062	4.66806		133.831	6.51839	166541	4510.15	1.94224	0.163858	0.711966	2.08005	0.99933	0.8096	0.367546	0.484074	0.518859	0.335766	0.146058			0.110867	0.34798
504	2020-08	2021-07	0.6109	0.587113	1328	0.374085	0.769924	0.744082	0.337892	0.999878	59.95	0.437591	29161.5	0.167719	0.142358	0.00375766	0.778129	0.248864	0.0180307	4.14229		124.162	6.73443	200093	18564.5	2.50716	0.139953	0.844178	1.64987	1	0.779991	0.367391	0.497421	0.531461	0.343066	0.145731			0.0990331	0.348274
505	2020-08	2021-08	0.637721	0.600509	1189	0.347763	0.78952	0.618503	0.360139	0.999878	59.7244	0.435944		0.147953	0.138953	0.00377109	0.753286	0.213319	0.0116938	4.9447		101.903	5.4534	187416	22803.7	2.04356	0.165669	0.576708	2.10688	1	0.757133	0.383498	0.496847	0.525348	0.350365	0.146992			0.101253	0.370148
506	2020-08	2021-09	0.665619	0.660831	1064	0.320578	0.809114	0.742344	0.377066	0.999939	57.3062	0.418293		0.134366	0.127631	0.00365169	0.732778	0.163921	0.00641066	4.38223		58.1401	3.32845	136275	17409.6	1.07123	0.14315	0.521995	2.0217	0.995573	0.681245	0.37991	0.483036	0.504421	0.379562	0.150296			0.0997734	0.316799
507	2020-08	2021-10	0.637624	0.607492	1202	0.348002	0.789345	0.660141	0.355075	0.999939	59.1439	0.431707	17510.7	0.143797	0.136605	0.00383037	0.727841	0.224283	0.00716036	4.80887		35.7876	3.18864	178424	24105.8	1.11779	0.133297	0.709283	2.95306	1	0.734619	0.366768	0.481517	0.516187	0.364964	0.153385			0.100454	0.34705
508	2020-08	2021-11	0.632379	0.597652	1233	0.353194	0.785528	0.659443	0.339372	0.999939	57.5934	0.42039		0.149408	0.132792	0.00361953	0.755751	0.186711	0.0119846	4.31323		80.4894	5.01908	167733	19396.7	1.70402	0.148503	0.693068	4.04608	0.999336	0.732718	0.356121	0.468061	0.489936	0.372263	0.154837			0.102103	0.3068
509	2020-08	2021-12	0.625261	0.567173	1255	0.360011	0.780479	0.732811	0.322305	0.999939	58.6771	0.4283	36756	0.1244	0.13814	0.00368359	0.777204	0.180934	0.00839947	4.41459		14.3542	4.27066	181226	24206.5	0.273679	0.140099	0.719312	4.0969	0.998668	0.795054	0.351034	0.448595	0.484434	0.379562	0.156438			0.103885	0.315845
510	2020-09	2020-10	0.737323	0.861818	777	0.25105	0.856457	0.688143	0.525519	0.999939	57.0175	0.416186		0.118053	0.124478	0.00352012	0.767578	0.17556	0.000168935	4.61777		22.5513	0.910816	20610.5	4561.72	0.222137	0.104585	0.258652	1.71293	1	0.595659	0.462864	0.596741	0.632398	0.284672	0.150515			0.0535775	0.330604
511	2020-09	2020-11	0.688986	0.752646	929	0.297375	0.825343	0.735033	0.425808	0.999756	52.7541	0.385067		0.134219	0.108483	0.00321412	0.727313	0.253316	0.00359458	4.0019		77.301	3.45612	19483.3	15473.3	2.08828	0.136654	0.273633	2.3592	1	0.607562	0.425285	0.536587	0.568811	0.335766	0.153027			0.0657419	0.281576
512	2020-09	2020-12	0.664706	0.708102	1026	0.320926	0.808867	0.758725	0.398826	0.999756	49.8197	0.363647		0.149916	0.101014	0.00294154	0.74398	0.199405	0.00438949	4.04195		87.6079	3.79174	36253.2	12479.9	2.254	0.14838	0.242885	3.10557	0.999291	0.648778	0.395998	0.50232	0.536253	0.343066	0.156592			0.0825536	0.27812
513	2020-09	2021-01	0.674943	0.715223	995	0.311132	0.815775	0.764407	0.392336	0.999695	49.6286	0.362253	23620.2	0.152065	0.0985105	0.00314769	0.714355	0.174392	0.00373771	3.87601		87.7781	3.31544	17295.9	14936	1.89857	0.136696	0.308045	2.21758	0.99929	0.693818	0.411152	0.49494	0.522273	0.350365	0.157518			0.081609	0.255837
514	2020-09	2021-02	0.652036	0.704765	1094	0.333435	0.799927	0.712736	0.350542	0.999695	54.2033	0.395645	29315	0.115098	0.113732	0.00331738	0.757201	0.197932	0.00185782	4.31173		32.673	3.09266	7202.94	19885.9	0.802849	0.12525	0.3079	1.52018	1	0.653073	0.395499	0.505496	0.53056	0.335766	0.154758			0.0974909	0.299311
515	2020-09	2021-03	0.63197	0.63396	1188	0.353046	0.785637	0.670452	0.337936	0.999756	57.6194	0.42058		0.11227	0.127308	0.00355223	0.75731	0.225196	0.00437075	4.39969		44.9073	3.90401	91943.2	15498	0.403243	0.146334	0.301539	1.87674	1	0.703997	0.392997	0.494035	0.527499	0.335766	0.149002			0.102614	0.323343
516	2020-09	2021-04	0.655672	0.625278	1117	0.330376	0.802126	0.690626	0.360192	0.999756	58.4551	0.42668	42872.5	0.134095	0.132179	0.00359768	0.749001	0.203887	0.00683014	4.26238		45.1395	4.98379	116654	11682.9	1.20961	0.129487	0.390783	1.40309	0.998658	0.787268	0.404207	0.502591	0.544321	0.321168	0.147964			0.0998269	0.312696
517	2020-09	2021-05	0.645745	0.61825	1174	0.340191	0.795042	0.700735	0.358524	0.999756	58.1034	0.424112		0.136991	0.130722	0.00361329	0.742576	0.27607	0.00730451	4.07807		100.242	6.32883	141549	7777.27	1.71447	0.137152	0.594309	1.43551	1	0.678362	0.405314	0.500352	0.536603	0.313869	0.149131			0.0938326	0.317173
518	2020-09	2021-06	0.616579	0.612188	1309	0.368629	0.774038	0.624088	0.350982	0.999817	59.1185	0.431522		0.169298	0.13652	0.00374435	0.737026	0.25322	0.0054068	4.55839		66.5494	5.76059	178392	6513.22	0.803517	0.153192	0.769829	1.59926	0.998029	0.792734	0.383114	0.495873	0.539186	0.321168	0.148096			0.101075	0.341599
519	2020-09	2021-07	0.624818	0.563515	1288	0.360784	0.779904	0.737191	0.344651	0.999939	59.6154	0.435149	42428.1	0.140103	0.139076	0.00376393	0.760437	0.24481	0.00601524	4.26859		56.8794	6.08504	211970	23877.9	1.45533	0.12506	0.903892	1.18593	1	0.764995	0.380783	0.511584	0.546279	0.313869	0.148333			0.0967154	0.326819
520	2020-09	2021-08	0.630792	0.569857	1235	0.354681	0.78443	0.642956	0.351986	0.999939	58.9661	0.430409	41587.7	0.127448	0.134313	0.0036902	0.741561	0.21412	0.00256373	4.63564		34.6317	4.78099	199349	28156.6	0.893076	0.134068	0.631898	1.3796	1	0.652931	0.391402	0.497375	0.524372	0.328467	0.149638			0.0931688	0.338424
521	2020-09	2021-09	0.646771	0.624966	1154	0.339013	0.795897	0.729661	0.361962	0.999878	58.0345	0.423609	41887.2	0.137212	0.130768	0.00366514	0.752968	0.183856	0.000636351	4.47419		9.63918	2.50117	148252	22918.7	0.762016	0.138403	0.575185	1.38285	1	0.704929	0.387089	0.478718	0.494375	0.372263	0.153093			0.0940465	0.319775
522	2020-09	2021-10	0.631252	0.584277	1246	0.35438	0.784653	0.684323	0.354153	0.999878	58.0345	0.423609	39936.1	0.148001	0.13249	0.00372615	0.756259	0.246644	0.00230846	4.41251		31.7263	3.83095	190391	29848	0.736954	0.141018	0.760362	2.2177	1	0.637809	0.378024	0.48045	0.506135	0.357664	0.156793			0.0952956	0.340982
523	2020-09	2021-11	0.628555	0.588575	1267	0.357103	0.782639	0.680606	0.341431	0.999878	58.5918	0.427677	25429.2	0.141165	0.135981	0.0036649	0.780443	0.227301	0.00358132	4.4763		13.4305	4.78669	179623	25170	0.391926	0.157343	0.747255	3.04358	1	0.715591	0.368738	0.476691	0.490235	0.350365	0.157442			0.0974388	0.309833
524	2020-09	2021-12	0.60786	0.553085	1347	0.3771	0.767638	0.686213	0.318925	0.999878	59.0169	0.430781		0.159715	0.14022	0.00368888	0.75157	0.234133	0.00477422	4.55139		53.5462	5.52646	193068	29978.9	1.72119	0.145857	0.777801	3.26411	1	0.682891	0.353415	0.450714	0.475018	0.364964	0.159588			0.101268	0.322945
525	2020-10	2020-11	0.73803	0.844963	766	0.250245	0.856983	0.705472	0.507364	0.999817	54.2033	0.395645	26257.3	0.137448	0.114057	0.00336592	0.777029	0.207494	0.00420312	4.25721		99.8435	3.73286	5523.31	12039.5	1.99093	0.149016	0.287822	2.6336	1	0.668171	0.451834	0.570078	0.5747	0.321168	0.154442			0.0492956	0.315553
526	2020-10	2020-12	0.709194	0.798644	873	0.278114	0.838483	0.710911	0.461565	0.999817	55.0364	0.401725		0.163545	0.119733	0.00343664	0.737732	0.160906	0.00492479	4.29607		110.142	3.94008	16143.3	8842.06	2.16306	0.121025	0.262307	3.26772	1	0.718927	0.420916	0.537126	0.538403	0.343066	0.157583			0.0672819	0.30994
527	2020-10	2021-01	0.69367	0.784407	934	0.293158	0.828246	0.709065	0.432273	0.999634	55.0636	0.401924		0.142236	0.119082	0.00358625	0.764112	0.156386	0.00416365	4.48421		110.314	3.44927	5650.32	11728.3	1.80514	0.135503	0.27639	2.37809	1	0.801064	0.410222	0.517106	0.521269	0.343066	0.158423			0.0738903	0.306589
528	2020-10	2021-02	0.669113	0.726318	1037	0.317028	0.811626	0.784165	0.38179	0.999756	53.4322	0.390016	31847.5	0.118341	0.11214	0.00333289	0.753725	0.170296	0.00185387	3.86685		55.2043	3.06695	20506.8	16859	0.735036	0.119288	0.271233	1.82694	0.999307	0.718964	0.406229	0.541215	0.547555	0.321168	0.378351			0.0778918	0.301319
529	2020-10	2021-03	0.652133	0.69599	1117	0.333632	0.799785	0.741074	0.367612	0.999817	51.6817	0.377239		0.0977588	0.10378	0.0031108	0.738998	0.168647	0.0035869	3.72792		22.3581	3.30896	71659.4	12568.2	0.376436	0.155062	0.292737	2.27589	1	0.653373	0.400582	0.513091	0.526865	0.335766	0.151213			0.0958404	0.254586
530	2020-10	2021-04	0.668106	0.676843	1076	0.318437	0.81063	0.641603	0.383932	0.999817	58.3609	0.425992	27691.8	0.127236	0.132391	0.00365932	0.753438	0.174952	0.00567573	4.66563		22.5888	4.38408	96526.2	8988.41	1.22408	0.134091	0.336405	1.6271	1	0.687107	0.410808	0.521333	0.540199	0.321168	0.14952			0.0862979	0.324114
531	2020-10	2021-05	0.662932	0.658839	1113	0.323641	0.806938	0.64831	0.379912	0.999817	58.3695	0.426055	45543.4	0.139786	0.13236	0.00365618	0.746887	0.238278	0.006149	4.33795		77.6965	5.70396	121321	5243.58	1.72797	0.121908	0.572352	1.74915	0.997369	0.652052	0.414461	0.531112	0.549139	0.313869	0.150565			0.0840268	0.298448
532	2020-10	2021-06	0.650624	0.636022	1176	0.335712	0.798285	0.685539	0.370593	0.999878	58.9237	0.4301		0.149274	0.13437	0.00373693	0.791426	0.217994	0.00440103	4.50497		44.0119	5.32207	157969	8266.16	0.798144	0.149865	0.73942	1.40685	1	0.730952	0.399626	0.534478	0.556435	0.29927	0.149305			0.0829556	0.305966
533	2020-10	2021-07	0.635596	0.573223	1251	0.35042	0.78757	0.729701	0.339528	0.999878	59.203	0.432139		0.108447	0.136392	0.00370302	0.785502	0.219185	0.00489989	4.2751		34.3305	5.61286	191653	26771	1.47394	0.14169	0.86816	1.43631	1	0.819925	0.389968	0.529194	0.546488	0.306569	0.149417			0.0864906	0.317856
534	2020-10	2021-08	0.638914	0.578391	1210	0.346904	0.790149	0.662511	0.349536	0.999878	58.1378	0.424363		0.11965	0.130554	0.00363224	0.760649	0.180532	0.00180209	4.48986		12.1081	4.32093	179008	31169.7	0.892593	0.142115	0.598468	1.71619	1	0.737266	0.393629	0.522172	0.533627	0.321168	0.151399			0.0916695	0.313963
535	2020-10	2021-09	0.651021	0.636326	1145	0.334991	0.798805	0.758424	0.349493	0.999817	56.2406	0.410515	24429.2	0.109748	0.122219	0.00354797	0.766164	0.174118	0.000632416	4.14002		31.875	2.50751	127913	25843	0.677611	0.148205	0.502933	1.79136	1	0.734384	0.386558	0.499454	0.515434	0.343066	0.154307			0.0853334	0.273432
536	2020-10	2021-10	0.639775	0.59052	1219	0.346208	0.790658	0.711845	0.351002	0.999817	58.4209	0.42643		0.128949	0.133476	0.00372862	0.781458	0.179027	0.00229742	4.2669		54.2175	3.80004	170059	32534	0.654239	0.147309	0.699021	2.71334	0.999101	0.718881	0.375387	0.490789	0.49889	0.357664	0.157177			0.0943271	0.316189
537	2020-10	2021-11	0.627474	0.596799	1280	0.358242	0.781793	0.781727	0.332866	0.999817	55.9821	0.408629	41928.7	0.126562	0.123341	0.00348799	0.789406	0.165438	0.00315182	3.88924		9.72203	4.44906	159259	27804.3	0.386072	0.154519	0.681889	3.40416	0.994759	0.760532	0.367187	0.48768	0.508181	0.343066	0.159835			0.103906	0.277666
538	2020-10	2021-12	0.608331	0.567297	1354	0.376739	0.767912	0.745261	0.309701	0.999817	57.2189	0.417656	42119.3	0.12923	0.13074	0.00353863	0.78535	0.166008	0.00476713	4.03011		76.0495	5.5574	172690	32628.8	1.62417	0.142789	0.737279	3.46591	1	0.791849	0.350594	0.470236	0.48033	0.364964	0.161425			0.10383	0.295945
539	2020-11	2020-12	0.741701	0.877768	747	0.246616	0.859349	0.822094	0.538566	1	49.5076	0.361369	20901.8	0.108092	0.0941805	0.00303785	0.7629	0.151735	0.000239995	3.49732		10.3565	1.34931	18002	4117.08	0.371791	0.108879	0.283655	1.39051	0.99857	0.566486	0.442906	0.582284	0.60188	0.335766	0.160989			0.0409606	0.273037
540	2020-11	2021-01	0.709373	0.868245	862	0.277796	0.838698	0.770768	0.487164	0.999817	51.3225	0.374617		0.104147	0.101337	0.00339229	0.758344	0.167944	0.000483433	3.89715		10.5052	1.82074	5514.02	3415.6	0.398326	0.107448	0.30208	1.58211	0.999284	0.70529	0.421082	0.544018	0.558341	0.350365	0.160746			0.0491222	0.269597
541	2020-11	2021-02	0.690359	0.815121	941	0.296285	0.826095	0.796906	0.434121	0.999939	51.9134	0.37893		0.116491	0.105761	0.00316659	0.740608	0.158512	0.00499767	3.85738		44.643	3.74132	18807.1	5693.98	1.46647	0.0915533	0.302962	2.3653	1	0.686539	0.411486	0.546196	0.560367	0.343066	0.159098			0.0718396	0.282462
542	2020-11	2021-03	0.656389	0.753961	1081	0.329272	0.802917	0.644471	0.409339	1	55.2721	0.403446	40709.8	0.148346	0.120097	0.00340132	0.769743	0.196143	0.012076	4.32871		122.2	5.45997	73621.6	3137.12	2.01432	0.114527	0.390643	1.58089	0.935439	0.751915	0.403121	0.514604	0.5387	0.343066	0.152524			0.084585	0.299271
543	2020-11	2021-04	0.659588	0.709453	1090	0.326445	0.804939	0.676303	0.404411	1	57.8619	0.42235		0.181864	0.132784	0.00360608	0.776893	0.208628	0.0156324	4.25046		122.427	6.67652	98542.7	4911.27	2.62447	0.116614	0.432088	2.2016	0.999324	0.811584	0.398671	0.512377	0.534793	0.335766	0.151185			0.0816481	0.302465
544	2020-11	2021-05	0.640426	0.658811	1183	0.3452	0.791395	0.671197	0.379951	1	57.1927	0.417465		0.200112	0.131093	0.00357818	0.770243	0.213539	0.0160528	3.98107		177.54	8.20081	123355	8131.8	3.02701	0.13972	0.652447	1.99382	0.999332	0.69764	0.397971	0.501158	0.516404	0.335766	0.152513			0.0903414	0.299529
545	2020-11	2021-06	0.61885	0.591507	1286	0.366277	0.775802	0.66765	0.355072	0.999939	55.9106	0.408107	14137.1	0.197174	0.125132	0.00352911	0.804974	0.194287	0.0130109	4.31805		143.85	6.88185	159929	19731.5	2.33714	0.149414	0.837802	2.40161	0.999076	0.803165	0.38351	0.510087	0.528031	0.335766	0.151525			0.0858577	0.31099
546	2020-11	2021-07	0.612442	0.516935	1327	0.372648	0.771009	0.732874	0.328805	0.999817	59.5399	0.434598	40437.2	0.183693	0.141816	0.00381069	0.765808	0.207445	0.0138825	4.26035		134.154	7.22483	193697	38687.2	2.86215	0.116767	0.971381	2.61101	0.998466	0.689657	0.375146	0.502055	0.519926	0.335766	0.151191			0.0859383	0.330223
547	2020-11	2021-08	0.618106	0.516151	1274	0.36683	0.775388	0.652823	0.331371	0.999817	58	0.423358		0.160819	0.132571	0.00364107	0.753504	0.224121	0.00859035	4.46265		111.889	6.00338	180968	43104	2.43678	0.111199	0.715172	1.69238	0.997729	0.738093	0.381356	0.49808	0.508454	0.343066	0.153056			0.0901318	0.33233
548	2020-11	2021-09	0.643408	0.571067	1155	0.342121	0.793639	0.682524	0.342767	0.999756	59.0169	0.430781		0.155149	0.135723	0.00377035	0.744404	0.178246	0.00425629	4.65583		68.0728	3.54822	129859	37744.8	1.55581	0.096783	0.632799	2.04908	0.998365	0.643926	0.374661	0.485633	0.493352	0.379562	0.156128			0.0867568	0.316431
549	2020-11	2021-10	0.621581	0.528439	1273	0.36361	0.777797	0.633237	0.338341	0.999756	60.3241	0.440322	41092.6	0.150065	0.141795	0.00393465	0.773245	0.193442	0.00405455	4.83477		45.6856	3.35451	171994	44430.9	1.60685	0.112908	0.797756	1.2512	1	0.820803	0.363094	0.473282	0.489313	0.364964	0.159809			0.0909662	0.348853
550	2020-11	2021-11	0.633878	0.54034	1232	0.351799	0.786556	0.704132	0.332071	0.999634	57.2189	0.417656	39728.8	0.16695	0.129038	0.00358914	0.770564	0.192794	0.00787577	4.24432		90.4422	5.518	161210	39656	2.11268	0.121951	0.785163	1.77424	1	0.723665	0.373672	0.469699	0.482224	0.364964	0.161673			0.0975501	0.285259
551	2020-11	2021-12	0.619556	0.516761	1284	0.365604	0.776307	0.689713	0.315652	0.999756	58.9576	0.430348	29573.8	0.128782	0.13658	0.00371728	0.777957	0.166329	0.00444774	4.52295		23.9406	4.66673	174606	44482	0.604355	0.103612	0.845053	1.76343	1	0.76803	0.353433	0.472205	0.493693	0.372263	0.163576			0.097283	0.282219
552	2020-12	2021-01	0.739973	0.867405	765	0.248457	0.858149	0.844127	0.525052	0.999817	46.465	0.339161		0.103376	0.0834583	0.00300398	0.73589	0.129175	0.000374841	3.31014		0.313451	1.67361	19598.5	3423.2	0.611727	0.0956589	0.299564	1.7927	0.986555	0.697872	0.435617	0.541717	0.550197	0.357664	0.165748			0.0561424	0.232184
553	2020-12	2021-02	0.702002	0.792939	908	0.285176	0.8337	0.767506	0.445756	0.999939	52.8015	0.385413	14414.1	0.131412	0.111093	0.00321452	0.733361	0.164406	0.00563	3.83905		54.9382	3.89517	35335.1	8392.59	1.64589	0.112698	0.324631	2.92371	1	0.774401	0.418191	0.523621	0.524252	0.364964	0.162577			0.0795032	0.288245
554	2020-12	2021-03	0.671433	0.792701	1034	0.31486	0.813155	0.656794	0.421463	1	55.4797	0.404962		0.169401	0.123006	0.00337688	0.748433	0.192833	0.0129043	4.20861		132.496	5.49558	56238.8	4790.66	2.17621	0.149415	0.284534	1.96591	0.999316	0.745629	0.41514	0.49707	0.5095	0.357664	0.155852			0.0913804	0.288157
555	2020-12	2021-04	0.670196	0.747242	1059	0.316308	0.812134	0.649539	0.418134	1	58.2838	0.425429	37566.4	0.186031	0.136428	0.00359067	0.76415	0.191408	0.0161797	4.35371		132.72	6.70658	81215.7	3536.34	2.76361	0.135258	0.369279	2.76553	0.944376	0.723959	0.409268	0.496433	0.50698	0.350365	0.154334			0.0873405	0.296492
556	2020-12	2021-05	0.638387	0.699701	1202	0.347298	0.78986	0.671419	0.387113	1	56.6392	0.413425	10446.5	0.206062	0.131125	0.00344958	0.760873	0.224873	0.0167936	4.02742		187.836	8.21465	106026	5444.64	3.15507	0.135586	0.560234	2.53378	0.99934	0.722813	0.399078	0.482044	0.484126	0.357664	0.155873			0.0973981	0.276861
557	2020-12	2021-06	0.621359	0.625844	1287	0.363971	0.777528	0.62472	0.356189	0.999939	59.4895	0.43423	45910.4	0.190099	0.14139	0.00378486	0.758172	0.231658	0.0135609	4.77383		154.151	6.29282	142608	16460.9	2.49436	0.155854	0.733052	2.86649	0.999346	0.755211	0.385166	0.499215	0.506229	0.350365	0.154323			0.0963328	0.336592
558	2020-12	2021-07	0.604725	0.537974	1372	0.380266	0.765229	0.708076	0.324335	0.999817	58.258	0.425241		0.188821	0.138554	0.00364013	0.772756	0.231166	0.0143835	3.86694		144.44	6.72363	176408	35204.9	2.99668	0.13986	0.870582	3.28759	0.999101	0.705276	0.37466	0.491828	0.492941	0.350365	0.154498			0.0981962	0.295009
559	2020-12	2021-08	0.609158	0.533994	1323	0.375639	0.768747	0.645241	0.328391	0.999817	59.1185	0.431522	18642.7	0.162791	0.139428	0.0036933	0.752515	0.206473	0.00912758	4.66206		122.174	5.45219	163593	39727.9	2.5846	0.138131	0.590643	2.32175	1	0.742974	0.363593	0.478125	0.474329	0.372263	0.156071			0.102049	0.314813
560	2020-12	2021-09	0.636308	0.590772	1194	0.349123	0.788523	0.760088	0.339322	0.999756	55.6776	0.406406	37459.4	0.151784	0.12338	0.00342347	0.750102	0.17954	0.00479682	4.00171		78.338	3.22008	112516	34450.3	1.73503	0.141975	0.543997	2.61975	1	0.58896	0.362495	0.469137	0.466267	0.40146	0.159977			0.09575	0.259419
561	2020-12	2021-10	0.616446	0.55296	1306	0.368718	0.77397	0.656234	0.336061	0.999756	59.4138	0.433677		0.148681	0.138426	0.00380171	0.742862	0.185011	0.00434978	4.70033		55.9487	2.84994	154638	41100.4	1.78492	0.150878	0.724034	1.56047	0.996695	0.833327	0.347604	0.466536	0.470763	0.386861	0.163772			0.0977222	0.332408
562	2020-12	2021-11	0.620035	0.569361	1301	0.365347	0.776499	0.680379	0.324959	0.999634	58.112	0.424175		0.152711	0.132942	0.00365339	0.772695	0.201798	0.00813243	4.25972		100.711	4.9364	143879	36409.1	2.26976	0.144917	0.705988	1.31298	1	0.787504	0.354537	0.461681	0.467178	0.394161	0.165178			0.0916705	0.275653
563	2020-12	2021-12	0.627804	0.552436	1261	0.35773	0.782173	0.765448	0.32059	0.999756	56.1516	0.409866	29226.4	0.122419	0.123867	0.00340505	0.776553	0.167026	0.00440743	4.15501		34.1411	4.07665	157166	41227.2	0.853698	0.129828	0.733254	1.2638	0.998699	0.741032	0.359977	0.484429	0.494336	0.386861	0.168204			0.0894659	0.265752
564	2021-01	2021-02	0.750168	0.868634	745	0.238859	0.864373	0.792473	0.509076	0.999878	50.2494	0.366784		0.100226	0.0982774	0.00328333	0.763651	0.171006	0.00387779	3.84721		55.1102	2.76284	15905.4	5465.93	1.2607	0.120204	0.250657	1.62736	1	0.687714	0.476159	0.586458	0.59345	0.328467	0.163845			0.0500896	0.267206
565	2021-01	2021-03	0.702477	0.778275	925	0.284966	0.833842	0.693797	0.463492	0.999817	53.4883	0.390426		0.144314	0.11297	0.00337979	0.762449	0.19177	0.0102746	4.0086		132.669	4.40419	75353.4	2332.65	1.83744	0.135692	0.308363	1.53656	0.999315	0.66951	0.441481	0.543959	0.563756	0.335766	0.156936			0.0689127	0.266086
566	2021-01	2021-04	0.698458	0.720537	958	0.289077	0.831041	0.619775	0.449785	0.999817	58.532	0.427241	45596.7	0.15785	0.134571	0.00378541	0.737744	0.17118	0.013404	4.58888		132.893	5.57813	100369	4104.72	2.47528	0.126894	0.362988	1.7487	0.995741	0.757036	0.432605	0.53279	0.542338	0.328467	0.154901			0.0719705	0.292569
567	2021-01	2021-05	0.682223	0.666558	1035	0.30495	0.820094	0.632694	0.413268	0.999817	57.9396	0.422917	36854.6	0.191196	0.133586	0.00378423	0.764324	0.208401	0.0142938	4.42394		188.009	7.70117	125198	7645.74	2.89365	0.149601	0.611824	1.41598	0.998677	0.766806	0.425229	0.523269	0.528136	0.328467	0.156463			0.0823708	0.305622
568	2021-01	2021-06	0.640722	0.583719	1214	0.345279	0.791337	0.638093	0.366197	0.999756	58.7367	0.428735		0.182855	0.136692	0.00391943	0.769927	0.212988	0.011107	4.8518		154.323	6.85737	161893	19242.6	2.17619	0.165368	0.800218	2.04358	0.999087	0.712103	0.407052	0.529264	0.546102	0.328467	0.15512			0.0807718	0.329449
569	2021-01	2021-07	0.634958	0.50637	1251	0.35101	0.787136	0.696336	0.343746	0.999756	58.8812	0.42979		0.173379	0.139684	0.00384454	0.761806	0.185254	0.0120388	4.14458		144.615	7.22988	195671	37885.4	2.71502	0.131169	0.937394	2.27598	1	0.732827	0.397889	0.521947	0.531683	0.328467	0.155109			0.0832035	0.291958
570	2021-01	2021-08	0.631438	0.504137	1238	0.354119	0.784845	0.665321	0.343989	0.999756	58.6515	0.428113	39992.4	0.145751	0.13613	0.00382057	0.749385	0.196415	0.00734358	4.42226		122.349	6.01686	182910	42416.1	2.2724	0.0950468	0.664079	1.4598	0.999338	0.657246	0.391495	0.498384	0.504003	0.350365	0.156866			0.0908158	0.318141
571	2021-01	2021-09	0.658484	0.558203	1113	0.327739	0.804015	0.745725	0.357973	0.999695	56.205	0.410255	34690.5	0.143233	0.125274	0.00368745	0.740133	0.160138	0.00367369	4.32755		78.5165	3.74096	131762	37231.5	1.3542	0.12217	0.575846	1.66301	0.998645	0.652213	0.386447	0.497885	0.509321	0.364964	0.160953			0.0796956	0.290887
572	2021-01	2021-10	0.639621	0.518964	1217	0.346329	0.79057	0.696369	0.346491	0.999695	58.8982	0.429914		0.131383	0.135661	0.0039621	0.735137	0.173993	0.00293555	4.5684		56.1268	3.39909	173914	43986.1	1.40371	0.132293	0.752357	1.36661	1	0.65814	0.382048	0.497604	0.510745	0.357664	0.164797			0.076964	0.329481
573	2021-01	2021-11	0.645047	0.531797	1204	0.341173	0.794329	0.673129	0.337861	0.999573	58.155	0.424489		0.145131	0.133299	0.00382175	0.774745	0.199481	0.00605496	4.39113		100.889	5.54764	163191	39323.3	1.93591	0.143438	0.74807	2.09324	0.999351	0.686629	0.373616	0.496556	0.509693	0.343066	0.166381			0.0834729	0.27613
574	2021-01	2021-12	0.649718	0.511081	1178	0.336571	0.797664	0.761385	0.333998	0.999695	56.1249	0.409671		0.11841	0.12507	0.00359269	0.767936	0.155117	0.00285118	3.91362		34.3256	4.75165	176600	44159.7	0.355079	0.120831	0.803732	2.27053	1	0.74962	0.376903	0.501177	0.507099	0.357664	0.169358			0.0771324	0.249016
575	2021-02	2021-03	0.732385	0.75868	828	0.256267	0.853035	0.667482	0.514909	0.999939	56.3383	0.411228		0.112729	0.121804	0.00346008	0.752623	0.153662	0.00290341	4.1828		77.5601	2.89121	91047.8	4634.01	0.853382	0.118378	0.277187	1.87479	0.998115	0.619325	0.467145	0.596627	0.615499	0.29927	0.154741			0.0481384	0.302986
576	2021-02	2021-04	0.724976	0.68975	871	0.26362	0.848178	0.666014	0.477382	0.999939	59.607	0.435088		0.120587	0.136372	0.00367678	0.734939	0.170225	0.00522955	4.32931		77.7852	4.03824	116089	8463.14	1.63212	0.106502	0.304412	1.17941	0.999341	0.819626	0.464174	0.589926	0.616301	0.284672	0.153042			0.0481923	0.294859
577	2021-02	2021-05	0.68828	0.631617	1024	0.29924	0.824055	0.677593	0.421021	0.999939	58.3095	0.425617	31283.5	0.152412	0.131978	0.00357037	0.741259	0.195682	0.00637772	4.32084		132.9	6.58151	140927	12419.9	2.12402	0.12159	0.570527	1.08942	1	0.639612	0.443708	0.581276	0.599616	0.284672	0.154433			0.0658079	0.301685
578	2021-02	2021-06	0.651265	0.546618	1185	0.335219	0.798641	0.658285	0.366017	0.999878	58.2666	0.425304		0.166702	0.133979	0.00365564	0.758345	0.171763	0.00421853	4.51612		99.2143	5.75503	177660	24391.7	1.24887	0.139513	0.756483	1.43605	1	0.801383	0.418605	0.578435	0.6086	0.291971	0.153169			0.0730132	0.309587
579	2021-02	2021-07	0.64015	0.469834	1244	0.346132	0.790713	0.758083	0.335137	0.999756	57.7754	0.421718		0.140568	0.133611	0.00356692	0.755954	0.198423	0.00479772	4.12172		89.5118	6.02417	211475	43121.6	1.8947	0.0950666	0.887587	1.38826	0.995963	0.781771	0.409807	0.573781	0.604235	0.291971	0.153664			0.0745709	0.292039
580	2021-02	2021-08	0.640154	0.465627	1217	0.345837	0.790929	0.717254	0.335522	0.999756	57.5934	0.42039		0.119342	0.130346	0.00348857	0.750001	0.153089	0.00218137	4.34493		67.2466	4.02939	198675	47627.3	1.37774	0.104891	0.623148	1.23087	1	0.77976	0.399665	0.54533	0.56181	0.306569	0.155598			0.0813886	0.303307
581	2021-02	2021-09	0.659691	0.516325	1122	0.326733	0.804734	0.733798	0.343933	0.999695	58.2409	0.425116	45930.4	0.130815	0.134223	0.00366211	0.738532	0.167407	0.000829792	4.49084		23.4612	3.21468	147506	42401.5	0.203846	0.0897108	0.530613	1.31662	0.997332	0.705003	0.40043	0.536013	0.56979	0.343066	0.158578			0.0718641	0.310215
582	2021-02	2021-10	0.645332	0.477626	1208	0.340954	0.794488	0.655413	0.337237	0.999695	60.8769	0.444357	28949.1	0.118885	0.145359	0.00397166	0.760517	0.175176	0.00052015	4.90113		1.6647	3.71697	189670	49171.3	0.261989	0.1092	0.716569	2.05661	0.999348	0.699341	0.381938	0.518602	0.535983	0.343066	0.161922			0.0718597	0.349308
583	2021-02	2021-11	0.631609	0.489337	1275	0.354364	0.784665	0.755127	0.319262	0.999573	56.2583	0.410645		0.136143	0.126858	0.0033929	0.767363	0.154372	0.0016642	4.20903		45.8118	4.31733	178970	44488.8	0.967737	0.142028	0.697507	2.89088	1	0.750078	0.37682	0.51366	0.541892	0.335766	0.164567			0.0954111	0.259813
584	2021-02	2021-12	0.636549	0.472629	1247	0.349496	0.788249	0.741935	0.313603	0.999695	57.1752	0.417337		0.138747	0.132866	0.00350966	0.778904	0.132548	0.00217115	4.06076		20.8982	3.96526	192358	49322.4	1.06928	0.108811	0.75386	3.22906	1	0.709023	0.380358	0.51309	0.532821	0.350365	0.166662			0.090054	0.278345
585	2021-03	2021-04	0.754436	0.874771	775	0.235348	0.866632	0.656521	0.516839	1	57.7321	0.421402	8448.5	0.111724	0.127144	0.00354864	0.767713	0.15324	0.000864872	4.31188		0.405793	1.65785	25550.5	4129.55	1.0515	0.0988166	0.281286	1.44916	1	0.664381	0.500067	0.644543	0.668962	0.248175	0.14818			0.0371887	0.288135
586	2021-03	2021-05	0.70665	0.79618	966	0.281633	0.836105	0.636182	0.454336	1	59.6825	0.435639	15989.1	0.124428	0.13635	0.00370779	0.750423	0.194619	0.00194975	4.23545		55.3398	5.47605	50000.6	8144.46	1.57632	0.123362	0.478469	1.33208	0.99936	0.71483	0.479973	0.621583	0.64427	0.255474	0.148989			0.0605676	0.28695
587	2021-03	2021-06	0.665202	0.688238	1143	0.321881	0.808189	0.551349	0.382458	0.999939	60.4235	0.441047	25949.6	0.156036	0.14143	0.00385026	0.797548	0.140489	0.000681132	4.85278		21.6682	3.88268	86897.2	20171.2	0.602941	0.106494	0.650192	2.08621	0.999366	0.651837	0.442679	0.618807	0.654923	0.255474	0.147765			0.0681505	0.322943
588	2021-03	2021-07	0.655809	0.587127	1194	0.331115	0.801595	0.702909	0.350723	0.999817	59.4979	0.434291		0.124148	0.138727	0.00375652	0.768555	0.173208	0.00124786	4.33671		12.0015	4.23021	120633	38860.9	1.33081	0.126232	0.787556	2.1965	1	0.698447	0.424008	0.609602	0.649914	0.255474	0.147982			0.0735809	0.307834
589	2021-03	2021-08	0.655183	0.582235	1171	0.331446	0.801357	0.619418	0.347387	0.999817	58.7622	0.428921		0.125321	0.134048	0.00367113	0.737717	0.140445	0.00115712	4.62471		10.3781	3.75866	107729	43292.9	0.702134	0.106222	0.515912	1.48166	0.998481	0.731859	0.435103	0.56242	0.582708	0.291971	0.14947			0.085102	0.307852
590	2021-03	2021-09	0.673002	0.639798	1084	0.314021	0.813746	0.695225	0.349569	0.999756	56.0357	0.40902	34865.5	0.126296	0.123861	0.00350544	0.772711	0.159325	0.00303333	3.92106		54.1956	4.03781	56528.1	38060.6	0.837539	0.0951877	0.464473	1.64728	0.995322	0.758001	0.420788	0.554896	0.572401	0.313869	0.15246			0.0777786	0.252844
591	2021-03	2021-10	0.648664	0.597967	1210	0.337894	0.796707	0.582443	0.342279	0.999756	61.041	0.445555	22963.8	0.144758	0.146166	0.00395626	0.756511	0.182016	0.00418257	4.5569		76.5621	4.91442	98696.9	44878.5	0.83088	0.124588	0.637371	1.53911	0.999122	0.74697	0.403014	0.533277	0.550057	0.335766	0.155766			0.0800542	0.306686
592	2021-03	2021-11	0.642078	0.609623	1247	0.34438	0.791993	0.702613	0.326788	0.999634	57.3672	0.418739		0.127951	0.130184	0.00358438	0.775962	0.150371	0.0020298	3.93357		31.8626	3.83037	88123.7	40176.9	0.237083	0.135396	0.615491	1.82532	1	0.71037	0.401115	0.538883	0.566456	0.321168	0.157688			0.100947	0.261088
593	2021-03	2021-12	0.638065	0.599201	1257	0.348199	0.7892	0.66533	0.320072	0.999756	57.4021	0.418993	21230.9	0.140237	0.133513	0.00355251	0.772788	0.158054	0.0061828	4.26341		98.394	5.64777	101789	45029.6	1.66885	0.124637	0.636999	2.32779	1	0.726285	0.388328	0.524279	0.556332	0.328467	0.159342			0.0980608	0.27514
594	2021-04	2021-05	0.75337	0.88178	805	0.236695	0.865766	0.705649	0.528059	1	59.4727	0.434107	42688.7	0.105425	0.134844	0.00370183	0.769132	0.148602	0.00120717	3.75778		55.1167	4.5565	25168	4362.41	0.813859	0.0863064	0.416189	0.875471	0.998123	0.691632	0.525467	0.657371	0.689491	0.233577	0.147632			0.0477178	0.28139
595	2021-04	2021-06	0.699853	0.752937	1022	0.288538	0.831409	0.704758	0.439258	0.999939	58.9237	0.4301		0.139897	0.134201	0.00372705	0.771608	0.178285	0.000525208	4.19057		21.4601	2.62162	62907.3	16584	0.621733	0.123026	0.562855	1.34751	0.99938	0.483908	0.47473	0.641509	0.688915	0.248175	0.146437			0.0603141	0.283565
596	2021-04	2021-07	0.693801	0.640127	1057	0.294511	0.827316	0.73328	0.401586	0.999817	57.3672	0.418739	39747.1	0.109897	0.129142	0.00349809	0.737658	0.146027	0.000481581	4.10166		11.7496	2.93837	95937.7	35159.9	0.402516	0.134308	0.682779	1.43488	0.99939	0.757237	0.466977	0.645356	0.690456	0.248175	0.146697			0.060126	0.266639
597	2021-04	2021-08	0.685512	0.629042	1068	0.302293	0.821941	0.724845	0.384998	0.999817	58.4466	0.426617	45757.2	0.0950401	0.132773	0.00365069	0.781055	0.147633	0.00167934	4.07059		10.5725	3.32553	83146.8	39550.8	0.579926	0.104971	0.433659	1.32497	1	0.677446	0.446678	0.583477	0.607354	0.277372	0.148691			0.0764711	0.282821
598	2021-04	2021-09	0.6898	0.687216	1037	0.297989	0.82492	0.726478	0.382989	0.999756	56.4358	0.41194		0.142093	0.126401	0.00351416	0.743793	0.153713	0.00507066	4.22092		54.4099	4.90324	32363.5	34297.2	1.60837	0.101435	0.376053	1.34535	0.999359	0.792611	0.434599	0.571503	0.592463	0.306569	0.152053			0.0710447	0.280316
599	2021-04	2021-10	0.667917	0.644922	1151	0.319456	0.809909	0.621154	0.366964	0.999756	59.9917	0.437895		0.137764	0.141665	0.00384783	0.754899	0.178929	0.00621107	4.60296		76.7815	5.27304	74182.9	41139.2	1.5951	0.144036	0.507551	2.07415	0.998121	0.747371	0.415165	0.540171	0.56313	0.313869	0.154977			0.0692979	0.324741
600	2021-04	2021-11	0.658314	0.657714	1200	0.328857	0.803214	0.723038	0.354841	0.999634	57.2014	0.417528	27253.7	0.114199	0.129881	0.00352537	0.775455	0.157255	0.00315317	4.05347		32.0665	3.7953	63749.3	36465.1	1.04922	0.152034	0.490796	2.74898	1	0.672188	0.416454	0.549559	0.574059	0.306569	0.156592			0.0934924	0.25999
601	2021-04	2021-12	0.647795	0.646447	1238	0.338992	0.795912	0.718985	0.339272	0.999756	57.1139	0.41689	15236.8	0.159745	0.133094	0.00345795	0.777596	0.177979	0.00811845	4.21829		98.6127	5.7668	77607.4	41292.2	2.33013	0.133276	0.553716	3.09105	0.999383	0.741065	0.402868	0.532728	0.564544	0.313869	0.158654			0.093713	0.25801
602	2021-05	2021-06	0.743689	0.827421	863	0.24629	0.859561	0.701724	0.487064	0.999939	57.4021	0.418993		0.128786	0.127029	0.0036936	0.761708	0.188094	0.00106033	4.29533		33.7	4.6723	38234.2	12509.8	1.21913	0.119872	0.321717	1.40121	0.998774	0.692201	0.51658	0.669873	0.703229	0.240876	0.419617			0.0396364	0.307625
603	2021-05	2021-07	0.72484	0.697877	946	0.264615	0.847518	0.743781	0.43553	0.999817	58.6174	0.427864		0.104538	0.13279	0.00367059	0.737836	0.186761	0.00112789	3.81049		43.4131	4.53801	71013.4	31210.3	0.567902	0.141597	0.41076	1.56071	1	0.725582	0.495443	0.664472	0.704854	0.233577	0.148358			0.042752	0.297125
604	2021-05	2021-08	0.716017	0.683476	961	0.272934	0.841967	0.730067	0.418964	0.999817	56.542	0.412715	19262.7	0.0996415	0.123579	0.00356179	0.757413	0.195158	0.00250644	4.18481		65.6715	5.41158	58252.5	35569.9	1.17189	0.135653	0.430103	1.2027	1	0.682329	0.479209	0.619242	0.646186	0.248175	0.150121			0.0599676	0.301781
605	2021-05	2021-09	0.680446	0.734774	1090	0.307215	0.818515	0.701033	0.384645	0.999756	57.6021	0.420453	43482	0.154246	0.130413	0.0036424	0.749055	0.201767	0.00598272	4.00862		109.521	6.6062	8651.48	30227.4	2.09759	0.129414	0.435676	1.28773	1	0.694525	0.440942	0.58564	0.617419	0.291971	0.152727			0.0628157	0.286061
606	2021-05	2021-10	0.669704	0.686057	1160	0.317895	0.811013	0.635459	0.375691	0.999756	57.8619	0.42235		0.151645	0.132197	0.00374186	0.758406	0.18211	0.00745003	4.34849		131.898	6.86182	49302.1	37053	2.08469	0.163941	0.500544	1.85414	1	0.703797	0.417498	0.559858	0.576584	0.306569	0.15638			0.0695287	0.312387
607	2021-05	2021-11	0.656478	0.707711	1225	0.330813	0.801812	0.65532	0.354572	0.999634	58.7452	0.428797		0.130491	0.136191	0.00369286	0.769033	0.190746	0.00475588	4.28072		87.1607	5.68628	39008.8	32382.6	1.56157	0.158718	0.466769	2.55625	1	0.683475	0.418933	0.555708	0.576426	0.284672	0.157356			0.0850683	0.270041
608	2021-05	2021-12	0.63923	0.686733	1293	0.347487	0.789722	0.68689	0.333164	0.999756	57.3672	0.418739		0.181094	0.134252	0.00355075	0.769083	0.19934	0.00976113	3.92236		153.728	7.46183	53251.1	37188.5	2.75771	0.161779	0.477111	2.84036	1	0.755449	0.404036	0.531305	0.549754	0.306569	0.159698			0.0878704	0.264056
609	2021-06	2021-07	0.764792	0.829616	799	0.226089	0.872547	0.700849	0.526356	0.999878	60.3573	0.440564	33397.5	0.123233	0.139146	0.00387676	0.742598	0.162492	0.000398625	4.59203		9.9143	1.71394	34601.7	19332.4	0.914692	0.143075	0.243559	1.19475	0.998804	0.691586	0.518426	0.678372	0.724095	0.226277	0.14692			0.0341258	0.308597
610	2021-06	2021-08	0.736251	0.800932	892	0.253481	0.854865	0.719034	0.481031	0.999878	57.9137	0.422728		0.130789	0.128641	0.00367294	0.740759	0.175421	0.00112607	3.78372		32.0312	2.62476	21826.7	23681.7	0.227272	0.145385	0.357876	1.32537	0.999386	0.562115	0.494382	0.635558	0.663483	0.255474	0.148918			0.0488761	0.292026
611	2021-06	2021-09	0.688611	0.786553	1069	0.29944	0.823917	0.628181	0.44269	0.999817	59.338	0.433124		0.141266	0.135554	0.00388678	0.741902	0.164795	0.00370045	4.71713		75.8625	4.17042	30795.4	18339.7	1.21051	0.142195	0.407142	1.4038	0.989959	0.719783	0.447406	0.581244	0.62194	0.291971	0.151253			0.0600336	0.316184
612	2021-06	2021-10	0.666386	0.784773	1187	0.321245	0.808641	0.655317	0.409835	0.999817	58.66	0.428175	31642.9	0.123707	0.132907	0.00383038	0.761814	0.188717	0.0047831	4.30466		98.2243	4.37923	13672.3	25037.2	1.19716	0.165836	0.400988	2.21939	0.974661	0.698068	0.416933	0.549548	0.57987	0.29927	0.154728			0.0679243	0.319093
613	2021-06	2021-11	0.655211	0.801988	1244	0.332176	0.800833	0.603067	0.387116	0.999695	60.2661	0.439898	39323.7	0.124801	0.139663	0.00389015	0.743545	0.168625	0.00208815	4.7433		53.5256	2.82367	4356.07	20384.7	0.631352	0.127269	0.393348	2.89343	0.988802	0.631445	0.404739	0.554709	0.591158	0.291971	0.155818			0.0880594	0.29198
614	2021-06	2021-12	0.638169	0.77582	1312	0.348658	0.788864	0.683539	0.362635	0.999817	58.3609	0.425992	26562.9	0.153773	0.133768	0.00374452	0.741638	0.181831	0.00627065	4.34883		120.057	4.89874	17329.5	25181.6	2.00959	0.156937	0.387772	3.05686	1	0.610232	0.398139	0.534902	0.563898	0.306569	0.158185			0.0892312	0.286415
615	2021-07	2021-08	0.755773	0.90131	825	0.234708	0.867043	0.706011	0.554686	1	59.5567	0.43472	20060.2	0.0840817	0.135212	0.0037914	0.774171	0.16788	0.0010103	4.35591		22.2666	2.27012	14352.3	5293.57	0.852415	0.104657	0.394217	1.27331	0.996376	0.66442	0.496389	0.651892	0.672285	0.248175	0.148904			0.0534691	0.278507
616	2021-07	2021-09	0.702326	0.800304	1024	0.286273	0.832953	0.751785	0.469143	0.999939	58.3095	0.425617	28823.5	0.11208	0.13064	0.00377155	0.741397	0.177481	0.00419192	4.00863		66.1133	4.34966	64312.8	4658.37	1.86057	0.114348	0.450704	1.31349	0.999383	0.653305	0.449293	0.594324	0.636297	0.277372	0.152466			0.0555206	0.302134
617	2021-07	2021-10	0.689616	0.824624	1100	0.298832	0.824337	0.669176	0.442383	0.999939	58.9406	0.430224		0.114818	0.13431	0.00381117	0.754823	0.208234	0.00512426	4.57382		88.4949	4.22296	23068.8	8213.19	1.84375	0.115954	0.380459	2.37888	1	0.732307	0.433117	0.562819	0.603706	0.291971	0.359056			0.0616665	0.335079
618	2021-07	2021-11	0.663265	0.793472	1221	0.324475	0.806344	0.735903	0.403977	0.999817	57.0175	0.416186		0.102357	0.126228	0.00357175	0.762873	0.184051	0.0024427	3.58023		43.7486	2.51763	33022	6381.11	1.30597	0.133238	0.356218	3.1931	0.996444	0.706285	0.411114	0.558751	0.593495	0.284672	0.156689			0.0786523	0.239446
619	2021-07	2021-12	0.656267	0.78484	1245	0.331205	0.80153	0.720448	0.3838	0.999939	57.7321	0.421402		0.147494	0.132161	0.00353378	0.772382	0.211853	0.0068593	3.79195		110.323	4.38116	23240.8	9071.57	2.56997	0.124062	0.338132	3.41181	0.925265	0.715742	0.403852	0.540296	0.566227	0.306569	0.158486			0.0828939	0.265422
620	2021-08	2021-09	0.733071	0.847412	883	0.256313	0.853005	0.673596	0.530273	0.999939	57.5413	0.420009	22916.6	0.112864	0.126516	0.00368015	0.763753	0.191967	0.0014822	4.62941		43.8499	2.97249	51350.5	6075.93	1.34095	0.0858426	0.257573	0.930139	0.997227	0.687043	0.46755	0.593624	0.621866	0.284672	0.351864			0.0579358	0.310348
621	2021-08	2021-10	0.707921	0.869209	1003	0.280874	0.836618	0.676296	0.479108	0.999939	59.4222	0.433739	29003.7	0.100264	0.135457	0.00388681	0.762786	0.168764	0.00243198	4.30118		66.2295	3.14036	9671.69	5184.83	1.32224	0.112939	0.287827	1.4139	0.99876	0.690683	0.444715	0.562089	0.587073	0.306569	0.156887			0.0568296	0.331669
622	2021-08	2021-11	0.679841	0.814382	1126	0.308155	0.817858	0.668957	0.422072	0.999817	55.4797	0.404962		0.105256	0.119485	0.00349804	0.757125	0.160869	0.00125589	4.23168		21.4961	2.31465	20067	6671.04	0.679151	0.135014	0.27686	2.23016	1	0.607715	0.414776	0.542439	0.569289	0.29927	0.351118			0.0770755	0.26515
623	2021-08	2021-12	0.666478	0.806414	1176	0.321048	0.80878	0.656526	0.393381	0.999939	56.1961	0.41019		0.135456	0.124908	0.00349905	0.730415	0.176898	0.00431497	4.42661		88.0582	3.42743	11337.3	6535.68	2.11442	0.117489	0.286363	2.45969	0.998322	0.66671	0.411169	0.520172	0.536482	0.328467	0.35245			0.0798069	0.277472
624	2021-09	2021-10	0.757208	0.870212	800	0.2331	0.868074	0.732515	0.534052	1	58.8727	0.429728	45858.3	0.0996928	0.13251	0.0038521	0.741541	0.177707	0.000872648	4.40929		22.3913	1.53213	42291.4	7351.22	0.105903	0.08587	0.306853	1.58249	0.980818	0.75136	0.474635	0.601417	0.633461	0.291971	0.160298			0.0404745	0.305666
625	2021-09	2021-11	0.709555	0.825275	991	0.279234	0.837727	0.781769	0.447769	0.999878	54.231	0.395847		0.118433	0.113556	0.00340068	0.742717	0.151112	0.00151986	3.76473		22.3732	2.65832	31845.8	4429.44	0.936936	0.136253	0.288984	2.39945	0.89456	0.693943	0.427065	0.577973	0.613767	0.291971	0.388958			0.0583293	0.244295
626	2021-09	2021-12	0.695703	0.789431	1041	0.29258	0.828642	0.845528	0.416846	1	47.3392	0.345542		0.114011	0.0895377	0.00294239	0.781406	0.147441	0.00266063	3.60111		44.2111	3.36831	46003.8	8029.19	1.15314	0.0918198	0.321709	2.74087	1	0.725631	0.418696	0.549459	0.579202	0.313869	0.408093			0.0607896	0.236114
627	2021-10	2021-11	0.740082	0.886388	891	0.24993	0.857189	0.697899	0.510319	0.999878	57.9569	0.423043	9430.32	0.105056	0.128562	0.00371487	0.771191	0.16796	0.00133411	4.10786		44.7632	2.49583	11681.6	5354.59	0.916505	0.110703	0.210825	1.45075	0.996118	0.646449	0.454022	0.599163	0.615774	0.306569	0.165579			0.0513883	0.296
628	2021-10	2021-12	0.715236	0.861786	985	0.273915	0.841308	0.727659	0.465683	1	56.3826	0.411552		0.113049	0.122362	0.00354741	0.767445	0.166115	0.000934852	3.74695		21.8327	2.26456	11245.3	2475.61	1.20812	0.0684627	0.260858	1.74302	1	0.627282	0.431252	0.575201	0.598519	0.321168	0.168363			0.0630669	0.27685
629	2021-11	2021-12	0.754551	0.906581	836	0.235958	0.86624	0.74324	0.554949	0.999878	53.963	0.39389		0.110223	0.111482	0.00328609	0.75285	0.154213	0.00177467	3.73396		66.5825	2.59789	15668.4	4979.86	1.77666	0.10666	0.240694	1.32347	1	0.542542	0.459526	0.590618	0.612048	0.306569	0.366006			0.0287455	0.210841
