# Supplementary material for: Models of similarity in complex networks
Source: PeerJ Comput Sci. 2023 May 2;9:e1371. doi: 10.7717/peerj-cs.1371 (PMC10280390; doi:10.7717/peerj-cs.1371)
Supplement: Supplemental Information 2 [file peerj-cs-09-1371-s002.xlsx]

## Sheet: complexity_runtime
Graph size	Measure	avg
100	CommunicabilityJSD	0.0489907
150	CommunicabilityJSD	0.11047
200	CommunicabilityJSD	0.224812
250	CommunicabilityJSD	0.343852
300	CommunicabilityJSD	0.519946
350	CommunicabilityJSD	0.662409
400	CommunicabilityJSD	0.896662
450	CommunicabilityJSD	1.02793
500	CommunicabilityJSD	1.28487
550	CommunicabilityJSD	1.55591
600	CommunicabilityJSD	1.90766
650	CommunicabilityJSD	2.26681
700	CommunicabilityJSD	2.68235
750	CommunicabilityJSD	3.06056
800	CommunicabilityJSD	3.59437
850	CommunicabilityJSD	4.08749
900	CommunicabilityJSD	4.85009
950	CommunicabilityJSD	5.19545
1000	CommunicabilityJSD	5.83415
1500	CommunicabilityJSD	20.6044
2000	CommunicabilityJSD	27.2401
2500	CommunicabilityJSD	49.1252
3000	CommunicabilityJSD	80.4168
100	degreeJSD	0.00153347
150	degreeJSD	0.00224298
200	degreeJSD	0.00279784
250	degreeJSD	0.00310394
300	degreeJSD	0.00346411
350	degreeJSD	0.00400355
400	degreeJSD	0.00441654
450	degreeJSD	0.00472329
500	degreeJSD	0.00517167
550	degreeJSD	0.00560803
600	degreeJSD	0.00617737
650	degreeJSD	0.00687668
700	degreeJSD	0.00730761
750	degreeJSD	0.00765507
800	degreeJSD	0.00790975
850	degreeJSD	0.00841718
900	degreeJSD	0.00869424
950	degreeJSD	0.00901286
1000	degreeJSD	0.0102547
1500	degreeJSD	0.0123033
2000	degreeJSD	0.014091
2500	degreeJSD	0.0196658
3000	degreeJSD	0.0272926
100	deltacon	0.00760123
150	deltacon	0.0135512
200	deltacon	0.0175367
250	deltacon	0.0247977
300	deltacon	0.035628
350	deltacon	0.0449025
400	deltacon	0.0716593
450	deltacon	0.0849341
500	deltacon	0.106824
550	deltacon	0.139037
600	deltacon	0.166935
650	deltacon	0.215716
700	deltacon	0.251403
750	deltacon	0.295794
800	deltacon	0.348739
850	deltacon	0.465875
900	deltacon	0.520836
950	deltacon	0.579612
1000	deltacon	0.662106
1500	deltacon	1.39656
2000	deltacon	2.83997
2500	deltacon	5.08241
3000	deltacon	8.13441
100	dk-series	0.0334082
150	dk-series	0.0523314
200	dk-series	0.0987807
250	dk-series	0.143631
300	dk-series	0.235154
350	dk-series	0.266246
400	dk-series	0.33524
450	dk-series	0.433129
500	dk-series	0.547571
550	dk-series	0.617643
600	dk-series	0.756058
650	dk-series	0.880199
700	dk-series	1.07593
750	dk-series	1.19919
800	dk-series	1.37843
850	dk-series	1.58238
900	dk-series	1.83546
950	dk-series	1.98415
1000	dk-series	2.06457
1500	dk-series	4.71466
2000	dk-series	8.74023
2500	dk-series	13.2802
3000	dk-series	18.943
100	d-measure	0.451829
150	d-measure	1.22215
200	d-measure	2.53878
250	d-measure	3.75062
300	d-measure	5.47714
350	d-measure	7.0421
400	d-measure	10.4685
450	d-measure	14.5508
500	d-measure	20.4826
550	d-measure	27.1766
600	d-measure	35.5021
650	d-measure	45.9665
700	d-measure	57.3266
750	d-measure	71.7977
800	d-measure	86.8341
850	d-measure	110.553
900	d-measure	132.791
950	d-measure	150.591
1000	d-measure	178.903
1500	d-measure	563.811
2000	d-measure	1366.42
2500	d-measure	2454.72
3000	d-measure	3233.57
100	d-NBD	0.116178
150	d-NBD	0.249847
200	d-NBD	0.440414
250	d-NBD	0.670542
300	d-NBD	1.40723
350	d-NBD	1.50096
400	d-NBD	1.98096
450	d-NBD	2.55225
500	d-NBD	3.18055
550	d-NBD	4.00849
600	d-NBD	4.73794
650	d-NBD	5.96736
700	d-NBD	6.90149
750	d-NBD	8.07947
800	d-NBD	9.49673
850	d-NBD	11.0933
900	d-NBD	14.0434
950	d-NBD	14.9581
1000	d-NBD	16.198
1500	d-NBD	49.0341
2000	d-NBD	98.381
2500	d-NBD	174.53
3000	d-NBD	352.032
100	Frobenius (Weighted)	0.00226006
150	Frobenius (Weighted)	0.00361086
200	Frobenius (Weighted)	0.00591423
250	Frobenius (Weighted)	0.00863187
300	Frobenius (Weighted)	0.0121355
350	Frobenius (Weighted)	0.0152488
400	Frobenius (Weighted)	0.0183891
450	Frobenius (Weighted)	0.0242418
500	Frobenius (Weighted)	0.0290365
550	Frobenius (Weighted)	0.0333582
600	Frobenius (Weighted)	0.0415547
650	Frobenius (Weighted)	0.0642006
700	Frobenius (Weighted)	0.0957847
750	Frobenius (Weighted)	0.110164
800	Frobenius (Weighted)	0.120997
850	Frobenius (Weighted)	0.13229
900	Frobenius (Weighted)	0.161498
950	Frobenius (Weighted)	0.195012
1000	Frobenius (Weighted)	0.309847
1500	Frobenius (Weighted)	0.458269
2000	Frobenius (Weighted)	0.735266
2500	Frobenius (Weighted)	1.27426
3000	Frobenius (Weighted)	1.87612
100	Graph Edit Distance	0.000410782
150	Graph Edit Distance	0.000702784
200	Graph Edit Distance	0.00101321
250	Graph Edit Distance	0.00209832
300	Graph Edit Distance	0.00466884
350	Graph Edit Distance	0.00549293
400	Graph Edit Distance	0.00602573
450	Graph Edit Distance	0.00661006
500	Graph Edit Distance	0.00780833
550	Graph Edit Distance	0.00846725
600	Graph Edit Distance	0.0114089
650	Graph Edit Distance	0.0136808
700	Graph Edit Distance	0.0154158
750	Graph Edit Distance	0.01763
800	Graph Edit Distance	0.018194
850	Graph Edit Distance	0.0221256
900	Graph Edit Distance	0.023267
950	Graph Edit Distance	0.0255281
1000	Graph Edit Distance	0.0287513
1500	Graph Edit Distance	0.058763
2000	Graph Edit Distance	0.114636
2500	Graph Edit Distance	0.177743
3000	Graph Edit Distance	0.321935
100	Graph Edit Distance (norm)	0.000400914
150	Graph Edit Distance (norm)	0.000770962
200	Graph Edit Distance (norm)	0.00115465
250	Graph Edit Distance (norm)	0.00212376
300	Graph Edit Distance (norm)	0.00418687
350	Graph Edit Distance (norm)	0.00489593
400	Graph Edit Distance (norm)	0.00510799
450	Graph Edit Distance (norm)	0.00764453
500	Graph Edit Distance (norm)	0.00904553
550	Graph Edit Distance (norm)	0.0107514
600	Graph Edit Distance (norm)	0.0117001
650	Graph Edit Distance (norm)	0.0157876
700	Graph Edit Distance (norm)	0.0180369
750	Graph Edit Distance (norm)	0.0234648
800	Graph Edit Distance (norm)	0.0248321
850	Graph Edit Distance (norm)	0.0268662
900	Graph Edit Distance (norm)	0.0328131
950	Graph Edit Distance (norm)	0.0342007
1000	Graph Edit Distance (norm)	0.036816
1500	Graph Edit Distance (norm)	0.0679765
2000	Graph Edit Distance (norm)	0.128687
2500	Graph Edit Distance (norm)	0.208316
3000	Graph Edit Distance (norm)	0.396133
100	GraphDiffusion	0.792392
200	GraphDiffusion	2.68367
300	GraphDiffusion	6.79598
400	GraphDiffusion	18.5379
500	GraphDiffusion	30.8948
600	GraphDiffusion	49.2098
700	GraphDiffusion	68.7788
800	GraphDiffusion	96.9118
1000	GraphDiffusion	166.281
1500	GraphDiffusion	460.387
2000	GraphDiffusion	950.055
2500	GraphDiffusion	1790.87
3000	GraphDiffusion	2925.58
100	HammingIpsenMikhailov	0.0453114
150	HammingIpsenMikhailov	0.0836161
200	HammingIpsenMikhailov	0.145091
250	HammingIpsenMikhailov	0.210764
300	HammingIpsenMikhailov	0.356845
350	HammingIpsenMikhailov	0.363787
400	HammingIpsenMikhailov	0.459843
450	HammingIpsenMikhailov	0.576379
500	HammingIpsenMikhailov	0.720881
550	HammingIpsenMikhailov	0.879235
600	HammingIpsenMikhailov	1.01425
650	HammingIpsenMikhailov	1.17153
700	HammingIpsenMikhailov	1.45416
750	HammingIpsenMikhailov	1.65792
800	HammingIpsenMikhailov	1.86851
850	HammingIpsenMikhailov	2.24845
900	HammingIpsenMikhailov	2.5583
950	HammingIpsenMikhailov	2.68478
1000	HammingIpsenMikhailov	3.04227
1500	HammingIpsenMikhailov	10.9694
2000	HammingIpsenMikhailov	14.9971
2500	HammingIpsenMikhailov	23.8343
3000	HammingIpsenMikhailov	37.7888
100	IpsenMikhailov	0.0717281
150	IpsenMikhailov	0.103691
200	IpsenMikhailov	0.156054
250	IpsenMikhailov	0.209695
300	IpsenMikhailov	0.389924
350	IpsenMikhailov	0.419256
400	IpsenMikhailov	0.455737
450	IpsenMikhailov	0.595363
500	IpsenMikhailov	0.718696
550	IpsenMikhailov	0.832295
600	IpsenMikhailov	1.00795
650	IpsenMikhailov	1.21034
700	IpsenMikhailov	1.48702
750	IpsenMikhailov	1.61732
800	IpsenMikhailov	1.88908
850	IpsenMikhailov	2.22419
900	IpsenMikhailov	2.62923
950	IpsenMikhailov	2.64102
1000	IpsenMikhailov	3.27901
1500	IpsenMikhailov	7.42578
2000	IpsenMikhailov	14.6359
2500	IpsenMikhailov	24.2778
3000	IpsenMikhailov	36.7428
100	Jaccard Index	0.000515608
150	Jaccard Index	0.000858792
200	Jaccard Index	0.00127681
250	Jaccard Index	0.00297632
300	Jaccard Index	0.00479679
350	Jaccard Index	0.00487331
400	Jaccard Index	0.00558103
450	Jaccard Index	0.00870371
500	Jaccard Index	0.0101382
550	Jaccard Index	0.0124435
600	Jaccard Index	0.0127479
650	Jaccard Index	0.017028
700	Jaccard Index	0.0189859
750	Jaccard Index	0.0217427
800	Jaccard Index	0.0221374
850	Jaccard Index	0.0238188
900	Jaccard Index	0.0342674
950	Jaccard Index	0.0348678
1000	Jaccard Index	0.036146
1500	Jaccard Index	0.0735403
2000	Jaccard Index	0.132573
2500	Jaccard Index	0.256509
3000	Jaccard Index	0.390919
100	lambda	0.00768759
150	lambda	0.0135857
200	lambda	0.0238732
250	lambda	0.0375592
300	lambda	0.0716744
350	lambda	0.0773072
400	lambda	0.111359
450	lambda	0.136036
500	lambda	0.190538
550	lambda	0.221537
600	lambda	0.265025
650	lambda	0.313437
700	lambda	0.378808
750	lambda	0.442945
800	lambda	0.541874
850	lambda	0.644774
900	lambda	0.892284
950	lambda	0.926834
1000	lambda	1.03869
1500	lambda	5.0723
2000	lambda	10.7918
2500	lambda	19.6456
3000	lambda	33.7545
100	Lap.JS	0.805857
150	Lap.JS	0.902471
200	Lap.JS	0.93255
250	Lap.JS	0.976112
300	Lap.JS	1.00328
350	Lap.JS	1.01302
400	Lap.JS	1.01895
450	Lap.JS	1.19009
500	Lap.JS	1.31633
550	Lap.JS	1.40986
600	Lap.JS	1.50727
650	Lap.JS	1.62562
700	Lap.JS	1.78351
750	Lap.JS	1.90118
800	Lap.JS	2.17736
850	Lap.JS	2.36214
900	Lap.JS	2.8438
950	Lap.JS	2.99169
1000	Lap.JS	3.20118
1500	Lap.JS	6.95285
2000	Lap.JS	12.2527
2500	Lap.JS	19.9172
3000	Lap.JS	30.5334
100	LD-measure	0.190845
150	LD-measure	0.5925
200	LD-measure	1.08775
250	LD-measure	1.58068
300	LD-measure	2.73133
350	LD-measure	3.20316
400	LD-measure	4.79584
450	LD-measure	6.62565
500	LD-measure	9.18663
550	LD-measure	12.519
600	LD-measure	16.3838
650	LD-measure	21.7734
700	LD-measure	27.2794
750	LD-measure	34.1807
800	LD-measure	41.1595
850	LD-measure	50.1779
900	LD-measure	61.898
950	LD-measure	70.9796
1000	LD-measure	82.5901
1500	LD-measure	275.869
2000	LD-measure	652.54
2500	LD-measure	1223.39
3000	LD-measure	1585.39
100	lric_sim	0.202606
150	lric_sim	0.690908
200	lric_sim	1.94033
250	lric_sim	4.04139
300	lric_sim	8.88482
350	lric_sim	11.609
400	lric_sim	18.58
450	lric_sim	26.7706
500	lric_sim	39.0417
550	lric_sim	53.2595
600	lric_sim	71.8718
650	lric_sim	93.953
700	lric_sim	122.006
750	lric_sim	150.077
800	lric_sim	186.652
850	lric_sim	231.289
900	lric_sim	301.694
950	lric_sim	340.552
1000	lric_sim	386.567
1500	lric_sim	1341.51
2000	lric_sim	3262.91
2500	lric_sim	4421.47
3000	lric_sim	5952.51
100	MCS	0.00051622
150	MCS	0.000720086
200	MCS	0.00116411
250	MCS	0.00169679
300	MCS	0.00277961
350	MCS	0.00281709
400	MCS	0.00405356
450	MCS	0.00502465
500	MCS	0.00547664
550	MCS	0.00629747
600	MCS	0.00796215
650	MCS	0.00936226
700	MCS	0.0100436
750	MCS	0.0126344
800	MCS	0.0138017
850	MCS	0.0167059
900	MCS	0.0206074
950	MCS	0.0211974
1000	MCS	0.0262216
1500	MCS	0.0397228
2000	MCS	0.0801573
2500	MCS	0.113205
3000	MCS	0.175945
100	NBD	0.281664
150	NBD	0.91487
200	NBD	1.54943
250	NBD	2.28967
300	NBD	3.95807
350	NBD	4.65121
400	NBD	5.96618
450	NBD	8.65404
500	NBD	10.3649
550	NBD	13.2546
600	NBD	15.5584
650	NBD	22.1078
700	NBD	23.7228
750	NBD	33.6042
800	NBD	38.0522
850	NBD	43.3684
900	NBD	48.862
950	NBD	53.3312
1000	NBD	67.5584
1500	NBD	348.813
2000	NBD	609.692
2500	NBD	865.116
3000	NBD	1186.88
100	NetLSD	0.0443956
150	NetLSD	0.0816514
200	NetLSD	0.145726
250	NetLSD	0.218754
300	NetLSD	0.303675
350	NetLSD	0.353799
400	NetLSD	0.449186
450	NetLSD	0.519879
500	NetLSD	0.623903
550	NetLSD	0.827335
600	NetLSD	0.863757
650	NetLSD	1.10914
700	NetLSD	1.30525
750	NetLSD	1.39614
800	NetLSD	1.5947
850	NetLSD	2.0251
900	NetLSD	2.05704
950	NetLSD	2.48574
1000	NetLSD	2.77815
1500	NetLSD	8.97015
2000	NetLSD	12.945
2500	NetLSD	20.2796
3000	NetLSD	30.5626
100	NetSimile	0.144202
150	NetSimile	0.251765
200	NetSimile	0.396138
250	NetSimile	0.630705
300	NetSimile	1.09745
350	NetSimile	1.20511
400	NetSimile	1.6294
450	NetSimile	2.0703
500	NetSimile	2.73062
550	NetSimile	3.55396
600	NetSimile	4.17138
650	NetSimile	5.02438
700	NetSimile	6.21874
750	NetSimile	7.27601
800	NetSimile	8.37347
850	NetSimile	10.2475
900	NetSimile	12.7187
950	NetSimile	14.1084
1000	NetSimile	15.7031
1500	NetSimile	60.0834
2000	NetSimile	108.098
2500	NetSimile	214.022
3000	NetSimile	360.982
100	nodes_neighborhood1	0.000933596
150	nodes_neighborhood1	0.0012161
200	nodes_neighborhood1	0.00170049
250	nodes_neighborhood1	0.00225451
300	nodes_neighborhood1	0.00407008
350	nodes_neighborhood1	0.00454231
400	nodes_neighborhood1	0.00563025
450	nodes_neighborhood1	0.00620478
500	nodes_neighborhood1	0.00796236
550	nodes_neighborhood1	0.00886333
600	nodes_neighborhood1	0.0109611
650	nodes_neighborhood1	0.0111881
700	nodes_neighborhood1	0.0130351
750	nodes_neighborhood1	0.0139531
800	nodes_neighborhood1	0.0171711
850	nodes_neighborhood1	0.0178223
900	nodes_neighborhood1	0.0196503
950	nodes_neighborhood1	0.0215115
1000	nodes_neighborhood1	0.0253088
1500	nodes_neighborhood1	0.0507981
2000	nodes_neighborhood1	0.11486
2500	nodes_neighborhood1	0.135476
3000	nodes_neighborhood1	0.232731
100	nodes_neighborhood2	0.00449255
150	nodes_neighborhood2	0.00874774
200	nodes_neighborhood2	0.0156395
250	nodes_neighborhood2	0.0264463
300	nodes_neighborhood2	0.0484618
350	nodes_neighborhood2	0.0624361
400	nodes_neighborhood2	0.0868265
450	nodes_neighborhood2	0.117295
500	nodes_neighborhood2	0.162427
550	nodes_neighborhood2	0.184128
600	nodes_neighborhood2	0.246182
650	nodes_neighborhood2	0.26851
700	nodes_neighborhood2	0.34122
750	nodes_neighborhood2	0.403252
800	nodes_neighborhood2	0.498022
850	nodes_neighborhood2	0.568957
900	nodes_neighborhood2	0.737235
950	nodes_neighborhood2	0.744938
1000	nodes_neighborhood2	0.871969
1500	nodes_neighborhood2	2.93643
2000	nodes_neighborhood2	6.04744
2500	nodes_neighborhood2	13.0124
3000	nodes_neighborhood2	20.7661
100	nodes_neighborhood3	0.0140448
150	nodes_neighborhood3	0.0315568
200	nodes_neighborhood3	0.0676854
250	nodes_neighborhood3	0.127085
300	nodes_neighborhood3	0.261397
350	nodes_neighborhood3	0.379247
400	nodes_neighborhood3	0.577561
450	nodes_neighborhood3	0.841578
500	nodes_neighborhood3	1.25654
550	nodes_neighborhood3	1.51329
600	nodes_neighborhood3	2.0816
650	nodes_neighborhood3	2.57644
700	nodes_neighborhood3	3.37411
750	nodes_neighborhood3	3.97401
800	nodes_neighborhood3	5.0205
850	nodes_neighborhood3	5.97793
900	nodes_neighborhood3	7.90151
950	nodes_neighborhood3	8.5007
1000	nodes_neighborhood3	9.80348
1500	nodes_neighborhood3	35.5802
2000	nodes_neighborhood3	91.4621
2500	nodes_neighborhood3	174.471
3000	nodes_neighborhood3	289.544
100	Onion Spectrum (Extended)	0.102297
150	Onion Spectrum (Extended)	0.243411
200	Onion Spectrum (Extended)	0.416104
250	Onion Spectrum (Extended)	0.719636
300	Onion Spectrum (Extended)	1.32437
350	Onion Spectrum (Extended)	1.42782
400	Onion Spectrum (Extended)	1.92866
450	Onion Spectrum (Extended)	2.20002
500	Onion Spectrum (Extended)	2.85637
550	Onion Spectrum (Extended)	3.45826
600	Onion Spectrum (Extended)	4.27815
650	Onion Spectrum (Extended)	5.1596
700	Onion Spectrum (Extended)	6.00656
750	Onion Spectrum (Extended)	7.14633
800	Onion Spectrum (Extended)	8.02366
850	Onion Spectrum (Extended)	9.30314
900	Onion Spectrum (Extended)	10.8226
950	Onion Spectrum (Extended)	11.441
1000	Onion Spectrum (Extended)	12.6197
1500	Onion Spectrum (Extended)	28.4614
2000	Onion Spectrum (Extended)	52.5832
2500	Onion Spectrum (Extended)	79.2155
3000	Onion Spectrum (Extended)	131.962
100	PolynomialDissimilarity	0.0426797
150	PolynomialDissimilarity	0.106144
200	PolynomialDissimilarity	0.193395
250	PolynomialDissimilarity	0.308944
300	PolynomialDissimilarity	0.530034
350	PolynomialDissimilarity	0.534621
400	PolynomialDissimilarity	0.682023
450	PolynomialDissimilarity	0.881171
500	PolynomialDissimilarity	1.10878
550	PolynomialDissimilarity	1.5062
600	PolynomialDissimilarity	1.68342
650	PolynomialDissimilarity	2.0427
700	PolynomialDissimilarity	2.43614
750	PolynomialDissimilarity	2.6763
800	PolynomialDissimilarity	3.24132
850	PolynomialDissimilarity	3.55684
900	PolynomialDissimilarity	4.45472
950	PolynomialDissimilarity	4.9958
1000	PolynomialDissimilarity	5.37945
1500	PolynomialDissimilarity	16.3306
2000	PolynomialDissimilarity	30.7103
2500	PolynomialDissimilarity	54.2183
3000	PolynomialDissimilarity	87.1135
100	PortraitDivergence	0.154569
150	PortraitDivergence	0.357454
200	PortraitDivergence	0.706208
250	PortraitDivergence	1.49068
300	PortraitDivergence	2.77382
350	PortraitDivergence	3.4713
400	PortraitDivergence	4.96386
450	PortraitDivergence	6.81635
500	PortraitDivergence	9.47629
550	PortraitDivergence	12.6219
600	PortraitDivergence	16.9244
650	PortraitDivergence	21.8273
700	PortraitDivergence	28.1883
750	PortraitDivergence	33.4436
800	PortraitDivergence	41.7536
850	PortraitDivergence	50.6675
900	PortraitDivergence	66.6255
950	PortraitDivergence	72.9228
1000	PortraitDivergence	83.3655
1500	PortraitDivergence	373.924
2000	PortraitDivergence	634.134
2500	PortraitDivergence	1259.96
3000	PortraitDivergence	2094.65
100	QuantumJSD	0.0270255
150	QuantumJSD	0.0572476
200	QuantumJSD	0.109096
250	QuantumJSD	0.176888
300	QuantumJSD	0.327552
350	QuantumJSD	0.344936
400	QuantumJSD	0.487024
450	QuantumJSD	0.639501
500	QuantumJSD	0.821474
550	QuantumJSD	0.947586
600	QuantumJSD	1.21742
650	QuantumJSD	1.44004
700	QuantumJSD	1.69164
750	QuantumJSD	2.02719
800	QuantumJSD	2.27863
850	QuantumJSD	2.71336
900	QuantumJSD	3.49113
950	QuantumJSD	3.61268
1000	QuantumJSD	4.0658
1500	QuantumJSD	10.3559
2000	QuantumJSD	22.0919
2500	QuantumJSD	42.9797
3000	QuantumJSD	59.7959
100	ResistancePerturbation	0.0158121
150	ResistancePerturbation	0.0261729
200	ResistancePerturbation	0.0464654
250	ResistancePerturbation	0.0634795
300	ResistancePerturbation	0.089522
350	ResistancePerturbation	0.108185
400	ResistancePerturbation	0.156202
450	ResistancePerturbation	0.176665
500	ResistancePerturbation	0.223702
550	ResistancePerturbation	0.29009
600	ResistancePerturbation	0.342753
650	ResistancePerturbation	0.422876
700	ResistancePerturbation	0.459642
750	ResistancePerturbation	0.537768
800	ResistancePerturbation	0.60388
850	ResistancePerturbation	0.713684
900	ResistancePerturbation	0.827779
950	ResistancePerturbation	0.865626
1000	ResistancePerturbation	0.950878
1500	ResistancePerturbation	3.03301
2000	ResistancePerturbation	4.79413
2500	ResistancePerturbation	6.75729
3000	ResistancePerturbation	10.4684
100	Signature similarity	0.172597
150	Signature similarity	0.299072
200	Signature similarity	0.47494
250	Signature similarity	0.716178
300	Signature similarity	1.34505
350	Signature similarity	1.38612
400	Signature similarity	1.75526
450	Signature similarity	2.18737
500	Signature similarity	2.59637
550	Signature similarity	3.11971
600	Signature similarity	3.93406
650	Signature similarity	4.54087
700	Signature similarity	5.36454
750	Signature similarity	5.77843
800	Signature similarity	6.51464
850	Signature similarity	7.9047
900	Signature similarity	9.39268
950	Signature similarity	9.72298
1000	Signature similarity	10.5013
1500	Signature similarity	26.7439
2000	Signature similarity	39.2709
2500	Signature similarity	60.7283
3000	Signature similarity	90.6514
100	Vector Similarity Algorithm	0.0217312
150	Vector Similarity Algorithm	0.0240846
200	Vector Similarity Algorithm	0.0376798
250	Vector Similarity Algorithm	0.080311
300	Vector Similarity Algorithm	0.12501
350	Vector Similarity Algorithm	0.138208
400	Vector Similarity Algorithm	0.152062
450	Vector Similarity Algorithm	0.214322
500	Vector Similarity Algorithm	0.280949
550	Vector Similarity Algorithm	0.319217
600	Vector Similarity Algorithm	0.353352
650	Vector Similarity Algorithm	0.511733
700	Vector Similarity Algorithm	0.555002
750	Vector Similarity Algorithm	0.733611
800	Vector Similarity Algorithm	0.854846
850	Vector Similarity Algorithm	1.14516
900	Vector Similarity Algorithm	1.39375
950	Vector Similarity Algorithm	1.62292
1000	Vector Similarity Algorithm	1.71862
1500	Vector Similarity Algorithm	2.41288
2000	Vector Similarity Algorithm	4.19672
2500	Vector Similarity Algorithm	5.93977
3000	Vector Similarity Algorithm	9.02671
100	veo	0.00038965
150	veo	0.000717734
200	veo	0.00100721
250	veo	0.00179745
300	veo	0.00286985
350	veo	0.00357031
400	veo	0.00504165
450	veo	0.00666942
500	veo	0.00968179
550	veo	0.010132
600	veo	0.0102532
650	veo	0.0136782
700	veo	0.014733
750	veo	0.0160288
800	veo	0.0165654
850	veo	0.0174664
900	veo	0.0250643
950	veo	0.0256632
1000	veo	0.0285826
1500	veo	0.0567831
2000	veo	0.167007
2500	veo	0.178933
3000	veo	0.269029
100	vertex_ranking	0.01046
150	vertex_ranking	0.01261
200	vertex_ranking	0.0201307
250	vertex_ranking	0.0212062
300	vertex_ranking	0.0233681
350	vertex_ranking	0.0250865
400	vertex_ranking	0.0321324
450	vertex_ranking	0.0416009
500	vertex_ranking	0.0662158
550	vertex_ranking	0.0876926
600	vertex_ranking	0.108404
650	vertex_ranking	0.125734
700	vertex_ranking	0.221127
750	vertex_ranking	0.24467
800	vertex_ranking	0.320368
850	vertex_ranking	0.367075
900	vertex_ranking	0.391791
950	vertex_ranking	0.419878
1000	vertex_ranking	0.483816
1500	vertex_ranking	0.775819
2000	vertex_ranking	1.78323
2500	vertex_ranking	2.30382
3000	vertex_ranking	3.32897
100	Weighted Jaccard Index	0.000404138
150	Weighted Jaccard Index	0.000700916
200	Weighted Jaccard Index	0.000957872
250	Weighted Jaccard Index	0.00206469
300	Weighted Jaccard Index	0.00339496
350	Weighted Jaccard Index	0.00344605
400	Weighted Jaccard Index	0.00449693
450	Weighted Jaccard Index	0.00606165
500	Weighted Jaccard Index	0.00683332
550	Weighted Jaccard Index	0.00819669
600	Weighted Jaccard Index	0.00954934
650	Weighted Jaccard Index	0.0147129
700	Weighted Jaccard Index	0.0147376
750	Weighted Jaccard Index	0.0155969
800	Weighted Jaccard Index	0.0169896
850	Weighted Jaccard Index	0.0171136
900	Weighted Jaccard Index	0.0222091
950	Weighted Jaccard Index	0.0227869
1000	Weighted Jaccard Index	0.029409
1500	Weighted Jaccard Index	0.0602733
2000	Weighted Jaccard Index	0.100902
2500	Weighted Jaccard Index	0.184438
3000	Weighted Jaccard Index	0.311745
