# Supplementary material for: Models of similarity in complex networks
Source: PeerJ Comput Sci. 2023 May 2;9:e1371. doi: 10.7717/peerj-cs.1371 (PMC10280390; doi:10.7717/peerj-cs.1371)
Supplement: Supplemental Information 4 [file peerj-cs-09-1371-s004.xlsx]

## Sheet: Sheet1
	Jaccard Index	Graph Edit Distance	Graph Edit Distance (norm)	veo	vertex_ranking	Vector Similarity Algorithm	Signature similarity	Frobenius	Frobenius_norm	IpsenMikhailov	HammingIpsenMikhailov	PolynomialDissimilarity	degreeJSD	PortraitDivergence	CommunicabilityJSD	GraphDiffusion	ResistancePerturbation	NetLSD	NetSimile	λ-d Adj.	λ-d Lap.	λ-d N.L.	Lap.JS	NBD	d-NBD	Onion Spectrum (Extended)	dk-series	nodes_neighborhood 1	nodes_neighborhood 2	nodes_neighborhood 3	MCS	deltacon	d-measure	LD-measure	lric_sim	QuantumJSD
Jaccard Index	251	-127.903	-197.524	197.524	176.355	187.454	98.4052	-127.901	-127.901	-46.9502	-38.8139	-128.221	-44.6422	-27.8106	-19.6063	-67.1505	-48.0689	-14.9467	-61.2851	-32.6449	-21.5036	-25.4748	-28.3551		-30.8685	-29.3461	-55.5581	187.165	145.419	81.3881	-18.0576	184.355	-29.3527	-76.8966	-177.373	-126.58
Graph Edit Distance	-127.903	251	181.695	-181.694	-105.168	-110.161	-13.6829	250.999	250.999	51.3921	86.8366	244.301	123.26	40.2367	-51.45	-49.8487	-36.6592	-66.6782	82.7209	76.2493	89.544	-45.7893	-74.7736		-53.2548	120.182	114.543	-70.0057	-25.0677	39.8939	-97.1204	-108.095	9.30633	7.88196	118.755	236.159
Graph Edit Distance (norm)	-197.524	181.695	251	-250.999	-154.568	-163.524	-63.7896	181.693	181.693	49.9525	63.733	179.734	81.7914	37.109	-12.2687	16.3146	20.9727	-21.9258	75.9884	53.1866	53.2751	-8.19094	-18.1766		-7.1344	70.8659	85.0434	-138.367	-93.9347	-28.7347	-36.4336	-164.56	22.52	52.3459	165.649	178.916
veo	197.524	-181.694	-250.999	251	154.568	163.523	63.7903	-181.692	-181.692	-49.9519	-63.7323	-179.733	-81.7921	-37.1097	12.2681	-16.3152	-20.9727	21.9251	-75.9878	-53.1872	-53.2745	8.19031	18.1772		7.13341	-70.8666	-85.044	138.366	93.934	28.7341	36.4329	164.559	-22.52	-52.3459	-165.649	-178.917
vertex_ranking	176.355	-105.168	-154.568	154.568	251	153.869	95.7187	-105.168	-105.168	-50.4265	-39.02	-106.265	-38.0306	-20.9817	-21.885	-70.9117	-40.3694	-20.1741	-55.926	-34.9236	-18.5297	-31.1129	-33.9674		-34.1853	-20.3029	-43.9484	155.854	123.826	73.6705	-26.5265	149.866	-26.4272	-70.9811	-185.531	-108.972
Vector Similarity Algorithm	187.454	-110.161	-163.524	163.523	153.869	251	94.1212	-110.16	-110.16	-99.1434	-85.9876	-110.879	-65.0691	-71.0742	-54.9596	-77.3027	-57.4709	-46.8494	-75.5471	-82.0496	-64.6862	-67.4267	-51.1811		-53.3053	-42.2038	-72.7413	156.198	135.354	83.688	-22.5308	163.711	-78.4419	-108.925	-155.247	-109.785
Signature similarity	98.4052	-13.6829	-63.7896	63.7903	95.7187	94.1212	251	-13.6818	-13.6818	-30.987	5.00985	-14.7182	19.3107	-19.6472	-66.7064	-108.388	-89.4402	-70.1152	-16.8063	1.53716	22.2444	-71.0272	-86.7875		-76.2024	34.0253	4.63552	109.713	130.08	118.043	-82.3178	101.611	-44.9592	-95.3266	-85.3347	-15.3434
Frobenius	-127.901	250.999	181.693	-181.692	-105.168	-110.16	-13.6818	251	251	51.3926	86.8368	244.302	123.261	40.2367	-51.4496	-49.8483	-36.6591	-66.6778	82.7213	76.2496	89.5442	-45.7889	-74.7725		-53.2539	120.183	114.544	-70.0042	-25.0679	39.8955	-97.1172	-108.095	9.30605	7.88178	118.755	236.159
Frobenius_norm	-127.901	250.999	181.693	-181.692	-105.168	-110.16	-13.6818	251	251	51.3926	86.8368	244.302	123.261	40.2367	-51.4496	-49.8483	-36.6591	-66.6778	82.7213	76.2496	89.5442	-45.7889	-74.7725		-53.2539	120.183	114.544	-70.0042	-25.0679	39.8955	-97.1172	-108.095	9.30605	7.88178	118.755	236.159
IpsenMikhailov	-46.9502	51.3921	49.9525	-49.9519	-50.4265	-99.1434	-30.987	51.3926	51.3926	251	164.835	53.2556	97.2452	111.1	79.6346	38.3318	30.5025	75.3687	73.8723	167.106	144.054	106.475	53.2989		57.3931	67.6014	90.2705	-44.6387	-34.952	-23.8987	5.24746	-40.4962	134.049	96.3404	46.3449	51.6651
HammingIpsenMikhailov	-38.8139	86.8366	63.733	-63.7323	-39.02	-85.9876	5.00985	86.8368	86.8368	164.835	251	86.8495	130.328	117.823	55.2281	-17.0914	-4.17863	35.4216	86.6572	202.967	197.936	63.5166	-0.741942		10.4602	108.112	107.376	-17.49	11.0297	34.0732	-54.6813	-29.7151	115.557	62.8588	41.955	86.0514
PolynomialDissimilarity	-128.221	244.301	179.734	-179.733	-106.265	-110.879	-14.7182	244.302	244.302	53.2556	86.8495	251	122.219	39.1588	-50.4499	-45.593	-36.5138	-65.5095	82.09	77.2279	88.9534	-43.6854	-71.7843		-50.5663	118.789	114.031	-71.7806	-26.7323	38.0905	-92.9214	-106.509	10.6419	8.85884	117.545	231.333
degreeJSD	-44.6422	123.26	81.7914	-81.7921	-38.0306	-65.0691	19.3107	123.261	123.261	97.2452	130.328	122.219	251	81.175	-8.3996	-54.6557	-26.5895	-23.0896	84.7642	125.524	143.575	2.00798	-47.3822		-29.3424	129.037	184.968	-5.84405	22.9764	59.6145	-92.8226	-33.1247	66.0396	29.1748	47.5253	122.166
PortraitDivergence	-27.8106	40.2367	37.109	-37.1097	-20.9817	-71.0742	-19.6472	40.2367	40.2367	111.1	117.823	39.1588	81.175	251	84.9199	12.5283	46.6346	52.5944	61.5349	116.567	119.028	75.9919	37.5512		41.5338	66.4716	74.6028	-6.8009	-27.243	-16.1671	-22.6175	-44.1462	135.404	91.7756	33.9138	40.0253
CommunicabilityJSD	-19.6063	-51.45	-12.2687	12.2681	-21.885	-54.9596	-66.7064	-51.4496	-51.4496	79.6346	55.2281	-50.4499	-8.3996	84.9199	251	108.973	111.781	141.526	20.7303	56.175	40.5938	149.432	127.355		121.193	-34.0338	-6.34897	-43.4744	-80.3476	-106.775	95.3076	-38.6164	139.657	131.688	18.9359	-49.705
GraphDiffusion	-67.1505	-49.8487	16.3146	-16.3152	-70.9117	-77.3027	-108.388	-49.8483	-49.8483	38.3318	-17.0914	-45.593	-54.6557	12.5283	108.973	251	151.564	125.922	-2.85591	-8.23181	-43.108	122.69	153.572		127.035	-83.323	-34.4821	-115.084	-144.471	-156.619	164.935	-73.933	77.3488	167.079	55.1387	-46.4721
ResistancePerturbation	-48.0689	-36.6592	20.9727	-20.9727	-40.3694	-57.4709	-89.4402	-36.6591	-36.6591	30.5025	-4.17863	-36.5138	-26.5895	46.6346	111.781	151.564	251	115.537	8.93193	-1.61171	-18.5165	104.788	155.798		119.173	-45.2049	-9.61	-59.9953	-127.013	-174.717	100.771	-71.8136	92.4972	161.361	44.865	-32.9585
NetLSD	-14.9467	-66.6782	-21.9258	21.9251	-20.1741	-46.8494	-70.1152	-66.6778	-66.6778	75.3687	35.4216	-65.5095	-23.0896	52.5944	141.526	125.922	115.537	251	4.67074	41.6026	16.6872	194.941	138.239		107.881	-50.815	-20.1086	-45.9858	-83.7649	-115.982	119.446	-30.3226	161.554	150.939	10.4017	-64.4215
NetSimile	-61.2851	82.7209	75.9884	-75.9878	-55.926	-75.5471	-16.8063	82.7213	82.7213	73.8723	86.6572	82.09	84.7642	61.5349	20.7303	-2.85591	8.93193	4.67074	251	83.2522	86.9243	22.9101	-3.26098		8.86335	66.1796	77.8186	-38.9757	-22.1621	7.50814	-37.9619	-60.447	61.8933	50.0714	60.7792	82.6211
λ-d Adj.	-32.6449	76.2493	53.1866	-53.1872	-34.9236	-82.0496	1.53716	76.2496	76.2496	167.106	202.967	77.2279	125.524	116.567	56.175	-8.23181	-1.61171	41.6026	83.2522	251	194.238	76.175	10.1139		15.4808	102.119	107.696	-16.5229	5.50784	24.9504	-42.6339	-22.9492	119.633	67.5738	33.8094	75.864
λ-d Lap.	-21.5036	89.544	53.2751	-53.2745	-18.5297	-64.6862	22.2444	89.5442	89.5442	144.054	197.936	88.9534	143.575	119.028	40.5938	-43.108	-18.5165	16.6872	86.9243	194.238	251	43.676	-20.6446		-9.12167	126.338	121.118	8.2364	30.4535	53.6192	-76.9411	-15.3188	112.191	47.3916	25.8587	88.8325
λ-d N.L.	-25.4748	-45.7893	-8.19094	8.19031	-31.1129	-67.4267	-71.0272	-45.7889	-45.7889	106.475	63.5166	-43.6854	2.00798	75.9919	149.432	122.69	104.788	194.941	22.9101	76.175	43.676	251	138.787		113.555	-28.4493	3.76875	-54.639	-86.0586	-106.356	105.172	-37.3568	173.933	157.751	19.8081	-44.0151
Lap.JS	-28.3551	-74.7736	-18.1766	18.1772	-33.9674	-51.1811	-86.7875	-74.7725	-74.7725	53.2989	-0.741942	-71.7843	-47.3822	37.5512	127.355	153.572	155.798	138.239	-3.26098	10.1139	-20.6446	138.787	251		133.917	-71.0931	-30.4074	-69.4509	-108.454	-147.589	146.619	-39.0784	118.261	160.848	22.0727	-72.8444
NBD																								251
d-NBD	-30.8685	-53.2548	-7.1344	7.13341	-34.1853	-53.3053	-76.2024	-53.2539	-53.2539	57.3931	10.4602	-50.5663	-29.3424	41.5338	121.193	127.035	119.173	107.881	8.86335	15.4808	-9.12167	113.555	133.917		251	-48.0742	-18.4539	-63.2465	-96.0522	-117.606	114.624	-41.5651	105.055	129.913	27.1155	-51.7788
Onion Spectrum (Extended)	-29.3461	120.182	70.8659	-70.8666	-20.3029	-42.2038	34.0253	120.183	120.183	67.6014	108.112	118.789	129.037	66.4716	-34.0338	-83.323	-45.2049	-50.815	66.1796	102.119	126.338	-28.4493	-71.0931		-48.0742	251	113.198	13.4137	42.7256	79.5661	-112.739	-19.2882	55.0585	5.76288	31.1161	118.553
dk-series	-55.5581	114.543	85.0434	-85.044	-43.9484	-72.7413	4.63552	114.544	114.544	90.2705	107.376	114.031	184.968	74.6028	-6.34897	-34.4821	-9.61	-20.1086	77.8186	107.696	121.118	3.76875	-30.4074		-18.4539	113.198	251	-22.0794	0.679403	34.7757	-70.1407	-38.2893	65.3511	43.7223	52.1393	113.399
nodes_neighborhood 1	187.165	-70.0057	-138.367	138.366	155.854	156.198	109.713	-70.0042	-70.0042	-44.6387	-17.49	-71.7806	-5.84405	-6.8009	-43.4744	-115.084	-59.9953	-45.9858	-38.9757	-16.5229	8.2364	-54.639	-69.4509		-63.2465	13.4137	-22.0794	251	173.139	114.283	-77.1562	145.236	-30.4126	-91.0559	-139.508	-69.6835
nodes_neighborhood 2	145.419	-25.0677	-93.9347	93.934	123.826	135.354	130.08	-25.0679	-25.0679	-34.952	11.0297	-26.7323	22.9764	-27.243	-80.3476	-144.471	-127.013	-83.7649	-22.1621	5.50784	30.4535	-86.0586	-108.454		-96.0522	42.7256	0.679403	173.139	251	175.254	-100.073	146.301	-59.3574	-134.641	-114.443	-25.4671
nodes_neighborhood 3	81.3881	39.8939	-28.7347	28.7341	73.6705	83.688	118.043	39.8955	39.8955	-23.8987	34.0732	38.0905	59.6145	-16.1671	-106.775	-156.619	-174.717	-115.982	7.50814	24.9504	53.6192	-106.356	-147.589		-117.606	79.5661	34.7757	114.283	175.254	251	-147.079	89.7443	-62.124	-139.748	-64.8093	38.8415
MCS	-18.0576	-97.1204	-36.4336	36.4329	-26.5265	-22.5308	-82.3178	-97.1172	-97.1172	5.24746	-54.6813	-92.9214	-92.8226	-22.6175	95.3076	164.935	100.771	119.446	-37.9619	-42.6339	-76.9411	105.172	146.619		114.624	-112.739	-70.1407	-77.1562	-100.073	-147.079	251	-20.8327	17.3235	81.5105	7.18301	-95.9
deltacon	184.355	-108.095	-164.56	164.559	149.866	163.711	101.611	-108.095	-108.095	-40.4962	-29.7151	-106.509	-33.1247	-44.1462	-38.6164	-73.933	-71.8136	-30.3226	-60.447	-22.9492	-15.3188	-37.3568	-39.0784		-41.5651	-19.2882	-38.2893	145.236	146.301	89.7443	-20.8327	251	-46.6116	-96.0296	-163.443	-107.931
d-measure	-29.3527	9.30633	22.52	-22.52	-26.4272	-78.4419	-44.9592	9.30605	9.30605	134.049	115.557	10.6419	66.0396	135.404	139.657	77.3488	92.4972	161.554	61.8933	119.633	112.191	173.933	118.261		105.055	55.0585	65.3511	-30.4126	-59.3574	-62.124	17.3235	-46.6116	251	145.334	33.119	9.97033
LD-measure	-76.8966	7.88196	52.3459	-52.3459	-70.9811	-108.925	-95.3266	7.88178	7.88178	96.3404	62.8588	8.85884	29.1748	91.7756	131.688	167.079	161.361	150.939	50.0714	67.5738	47.3916	157.751	160.848		129.913	5.76288	43.7223	-91.0559	-134.641	-139.748	81.5105	-96.0296	145.334	251	73.6832	9.67264
lric_sim	-177.373	118.755	165.649	-165.649	-185.531	-155.247	-85.3347	118.755	118.755	46.3449	41.955	117.545	47.5253	33.9138	18.9359	55.1387	44.865	10.4017	60.7792	33.8094	25.8587	19.8081	22.0727		27.1155	31.1161	52.1393	-139.508	-114.443	-64.8093	7.18301	-163.443	33.119	73.6832	251	121.857
QuantumJSD	-126.58	236.159	178.916	-178.917	-108.972	-109.785	-15.3434	236.159	236.159	51.6651	86.0514	231.333	122.166	40.0253	-49.705	-46.4721	-32.9585	-64.4215	82.6211	75.864	88.8325	-44.0151	-72.8444		-51.7788	118.553	113.399	-69.6835	-25.4671	38.8415	-95.9	-107.931	9.97033	9.67264	121.857	251
